# Supplementary material for: Valid gene expression normalization by RT-qPCR in studies on hPDL fibroblasts with focus on orthodontic tooth movement and periodontitis
Source: PubMed Central journal article supplement (PMC5677027; doi:10.1038/s41598-017-15281-0), 2017-11-07
Supplement: 41598_2017_15281_MOESM1_ESM.pdf [file 41598_2017_15281_MOESM1_ESM.pdf]

# **Valid gene expression normalization by RT-qPCR in studies on hPDL fibroblasts with focus on orthodontic tooth movement and periodontitis**

**Christian Kirschneck<sup>1,\*</sup>, Sarah Batschkus<sup>2</sup>, Peter Proff<sup>1</sup>, Josef Köstler<sup>3</sup>, Gerrit Spanier<sup>4</sup>, and Agnes Schröder<sup>1</sup>**

<sup>1</sup>Department of Orthodontics, University Medical Centre of Regensburg, Regensburg, D-93053, Germany

<sup>2</sup>Department of Orthodontics, University of Goettingen, Goettingen, D-37075, Germany

<sup>3</sup>Institute of Microbiology and Hygiene, University Medical Centre of Regensburg, Regensburg, D-93053, Germany

<sup>4</sup>Department of Cranial and Maxillo-Facial Surgery, University Medical Centre of Regensburg, Regensburg, D-93053, Germany

\*[christian.kirschneck@ukr.de](mailto:christian.kirschneck@ukr.de); Tel.: +49 941 944 6093; Fac.: +49 941 944 6169

## **Supplementary Information**

## Contents

|                                                                                                        | Page |
|--------------------------------------------------------------------------------------------------------|------|
| Supplementary Table 1 – MIQE checklist .....                                                           | 3    |
| Supplementary Table 2 – RNA quantity and quality .....                                                 | 10   |
| Supplementary Table 3 – Raw C <sub>q</sub> values of RT-qPCR .....                                     | 11   |
| Supplementary Table 4 – Gene stability ranking for individual experimental groups .....                | 12   |
| Supplementary Table 5 – Marker genes, primers and amplicons used for hPDL characterization .....       | 13   |
| Supplementary Figure 1 – Characterisation of hPDL fibroblasts .....                                    | 14   |
| Supplementary Figure 2 – Uncropped original gel of RT-qPCR products (amplification specificity) .....  | 15   |
| Supplementary Data 1 – Splice variants and secondary structure analysis of amplicons and primers ..... | 16   |
| Supplementary Data 2 – RNA integrity .....                                                             | 60   |
| Supplementary Data 3 – Amplification plot and Melting curve analysis (RT-qPCR) .....                   | 86   |
| Supplementary Data 4 – qPCR primer efficiency .....                                                    | 92   |
| Supplementary Data 5 – TUBB RT-qPCR, specificity and efficiency .....                                  | 101  |

**Supplementary Table 1.** MIQE checklist for authors, reviewers and editors. E = essential information; D = desirable information.

| Item to check                                               | Importance | Description how item was addressed in study / article                                                                                                                                                                                                                                                                                                                                                                                                                                                                                                                             |
|-------------------------------------------------------------|------------|-----------------------------------------------------------------------------------------------------------------------------------------------------------------------------------------------------------------------------------------------------------------------------------------------------------------------------------------------------------------------------------------------------------------------------------------------------------------------------------------------------------------------------------------------------------------------------------|
| <b>Experimental design</b>                                  |            |                                                                                                                                                                                                                                                                                                                                                                                                                                                                                                                                                                                   |
| Definition of experimental and control groups               | E          | Control group: untreated hPDL fibroblasts (physiological conditions); Experimental groups: hPDL fibroblasts treated with compressive orthodontic force (model for orthodontic tooth movement) or bacterial lysate of <i>Aggregatibacter actinomycetemcomitans</i> (Agac, model for bacterial periodontitis) for 24h. For details see materials and methods and Figure 5.                                                                                                                                                                                                          |
| Number within each group                                    | E          | n = 6                                                                                                                                                                                                                                                                                                                                                                                                                                                                                                                                                                             |
| Assay carried out by the core or investigator's laboratory? | D          | All assays were carried out in investigators' laboratory.                                                                                                                                                                                                                                                                                                                                                                                                                                                                                                                         |
| Acknowledgment of authors' contributions                    | D          | C.K. conceived the idea of the study/study design as well as designed/validated the used primer pairs. S.B., P.P. and A.S. contributed to discussion and study design. A.S. and C.K. conducted the experiments. A.S., C.K. and S.B. analysed the results. J.K. produced and contributed the Agac bacterial lysate. G.S. provided the primary hPDL fibroblasts. C.K. and A.S. wrote the manuscript and created the figures, tables and the supplementary material. All authors reviewed the manuscript.                                                                            |
| <b>Sample</b>                                               |            |                                                                                                                                                                                                                                                                                                                                                                                                                                                                                                                                                                                   |
| Description                                                 | E          | Primary human periodontal ligament fibroblasts (hPDL) were cultivated from periodontal connective tissue isolated from the middle root section of human teeth free of decay, which had been freshly extracted for medical reasons. A pool of hPDL cell lines from four different patients was used (1 male, 3 female, age: 16-23 years). Cells were identified by means of hPDL-specific marker gene expression and their spindle-shaped morphology (Supplementary Table 5 and Supplementary Figure). Ethical consent was obtained from the local ethics committee (12-170-0150). |
| Volume/mass of sample processed                             | D          | Varying size of tissue sample / number of hPDL fibroblasts extracted. 70.000 cells were finally seeded per well / biological replicate for the experiments.                                                                                                                                                                                                                                                                                                                                                                                                                       |
| Microdissection or macrodissection                          | E          | Microdissection                                                                                                                                                                                                                                                                                                                                                                                                                                                                                                                                                                   |
| Processing procedure                                        | E          | Tissue samples were grown in 6-well cell culture plates until proliferation of adherently growing hPDL under normal cell culture conditions (37°C, 5% CO <sub>2</sub> , water-saturated) in full media, then trypsinized and further cultivated and passaged until the 6 <sup>th</sup> passage.                                                                                                                                                                                                                                                                                   |
| If frozen, how and how quickly?                             | E          | Until use hPDL fibroblasts were frozen in liquid nitrogen (90% FCS, 10% DMSO, freezing 1°C/minute in cryo-box with isopropanol).                                                                                                                                                                                                                                                                                                                                                                                                                                                  |
| If fixed, with what and how quickly?                        | E          | Not fixed.                                                                                                                                                                                                                                                                                                                                                                                                                                                                                                                                                                        |

|                                                    |   |                                                                                                                                                                                                                                                                                                                                                                                                                                                                                                                    |
|----------------------------------------------------|---|--------------------------------------------------------------------------------------------------------------------------------------------------------------------------------------------------------------------------------------------------------------------------------------------------------------------------------------------------------------------------------------------------------------------------------------------------------------------------------------------------------------------|
| Sample storage conditions and duration             | E | Samples were directly isolated and cultivated under cell culture conditions in cell culture flasks and plates (37°C, 5% CO <sub>2</sub> , water-saturated) in full media consisting of DMEM high glucose (D5796, Sigma–Aldrich®, S4438, St. Louis, MI, USA), 10% FCS (P30-3306, PAN-Biotech, Aidenbach, Germany), 1% L-glutamine (SH30034.01, GE Healthcare Europe, Munich, Germany), 100 µM ascorbic acid (A8960, Sigma-Aldrich, Munich, Germany) and 1% antibiotics/antimycotics (A5955, Sigma–Aldrich®, S4438). |
| <b>Nucleic acid extraction</b>                     |   |                                                                                                                                                                                                                                                                                                                                                                                                                                                                                                                    |
| Procedure and/or instrumentation                   | E | After washing the cells twice with sterile phosphate-buffered saline, total RNA from hPDL cells was extracted by applying peqGOLD TriFast™ and further processing according to the manufacturer's instructions. We eluted the resulting RNA pellet in nuclease-free water (25µl) with immediate ice-cooling.                                                                                                                                                                                                       |
| Name of kit and details of any modifications       | E | peqGOLD TriFast™ (1 ml / well, PEQLAB Biotechnology GmbH, Erlangen, Germany). We followed the manufacturer's protocol exactly.                                                                                                                                                                                                                                                                                                                                                                                     |
| Source of additional reagents used                 | D | Chloroform (EMSURE®, 1.02445.1000; Merck KGaA, Darmstadt, Germany), 2-Propanol (20842.330, VWR International GmbH, Darmstadt, Germany), Ethanol (32205, Sigma-Aldrich, Munich, Germany); RNase-free water (T143, Bioscience-Grade, Carl Roth GmbH & Co. KG, Karlsruhe, Germany)                                                                                                                                                                                                                                    |
| Details of DNase or RNase treatment                | E | 1 µg of RNA was treated with 40 U of RNase inhibitor (EO0381, Life Technologies) in a 22 µl final volume for cDNA synthesis. No DNase treatment was performed.                                                                                                                                                                                                                                                                                                                                                     |
| Contamination assessment (DNA or RNA)              | E | For each primer pair and qPCR run we also tested a no-template-control (NTC) without cDNA and a -RT control (cDNA synthesis without enzyme reverse transcriptase added) on the same plate to exclude possible bias by primer dimers, contaminating or genomic DNA.                                                                                                                                                                                                                                                 |
| Nucleic acid quantification                        | E | RNA concentration was determined by measuring the absorbance at 260 nm UV light with 1 OD <sub>260nm</sub> equalling 40 ng/µl total RNA. OD = optical density                                                                                                                                                                                                                                                                                                                                                      |
| Instrument and method                              | E | NanoDrop ND-2000 UV spectrophotometer (Thermo Fisher Scientific, Waltham, MA, USA)                                                                                                                                                                                                                                                                                                                                                                                                                                 |
| Purity (A260/A280)                                 | D | RNA purity was determined by measuring the absorbance ratio OD <sub>260nm/280nm</sub> as well as OD <sub>260nm/230nm</sub> . An OD <sub>260nm/280nm</sub> ratio of >1.8 was considered protein-free RNA, and an OD <sub>260nm/230nm</sub> ratio of >2.0 phenol-/ethanol-free RNA (Supplementary Table 2).                                                                                                                                                                                                          |
| Yield                                              | D | RNA yield was calculated as the amount of RNA obtained (µg) per well. <b>Mean yield:</b> 358.2 ng/µl x 2000 µl/well = 716.4 µg/well; <b>Min./Max. yield:</b> 218.6 / 495.4 ng/µl x 2000 µl/well = 437.2 / 990.8 µg/well (Supplementary Table 2).                                                                                                                                                                                                                                                                   |
| RNA integrity: method/instrument                   | E | RNA integrity was determined with an Agilent 2100 Bioanalyzer (Agilent Technologies Inc. Santa Clara, CA, USA) according to the manufacturer's protocol (Supplementary Data 2).                                                                                                                                                                                                                                                                                                                                    |
| RIN/RQI or C <sub>q</sub> of 3' and 5' transcripts | E | RIN values ranged from 9.5 to 10 (mean 9.85, SD 0.15), indicating an absence of RNA degradation (Supplementary Data 2).                                                                                                                                                                                                                                                                                                                                                                                            |
| Electrophoresis traces                             | D | Electrophoresis traces were determined with an Agilent 2100 Bioanalyzer (Agilent Technologies Inc. Santa Clara, CA, USA) according to the manufacturer's protocol (Supplementary Data 2).                                                                                                                                                                                                                                                                                                                          |

|                                                                |   |                                                                                                                                                                                                                                                                                                                                                                                                                                                                                                                                                                                                                                                                                                                                                                                                                                                                                                                                                                                                                                                                                                                       |
|----------------------------------------------------------------|---|-----------------------------------------------------------------------------------------------------------------------------------------------------------------------------------------------------------------------------------------------------------------------------------------------------------------------------------------------------------------------------------------------------------------------------------------------------------------------------------------------------------------------------------------------------------------------------------------------------------------------------------------------------------------------------------------------------------------------------------------------------------------------------------------------------------------------------------------------------------------------------------------------------------------------------------------------------------------------------------------------------------------------------------------------------------------------------------------------------------------------|
| Inhibition testing (C <sub>q</sub> dilutions, spike, or other) | E | For evaluation of qPCR and primer efficiency as well as absence of inhibitors a log <sub>10</sub> serial dilution series of a random cDNA sample from the untreated group was amplified in triplet for each candidate reference gene and the limit of detection (LOD) as the highest dilution, at which 95% (all three) of the technical replicates are detectable (C <sub>q</sub> values), was determined. A standard curve was created by linear regression of the resulting C <sub>q</sub> values with the relative dilution within the linear dynamic range (LDR) and the coefficient of determination r <sup>2</sup> as well as qPCR reaction efficiencies (E) with 95% confidence intervals were determined from the slope of the standard curve: $E = (10^{-1/\text{slope}} - 1) \times 100\%$ . Only primer pairs with a linear relation between C <sub>q</sub> and log-transformed cDNA copy number (r <sup>2</sup> >0.98) were considered as possible valid reference gene candidates. In addition, only efficiencies E within the range of 90-110% were deemed acceptable. (Table 2, Supplementary Data 4) |
| <b>Reverse transcription</b>                                   |   |                                                                                                                                                                                                                                                                                                                                                                                                                                                                                                                                                                                                                                                                                                                                                                                                                                                                                                                                                                                                                                                                                                                       |
| Complete reaction conditions                                   | E | To synthesize cDNA, we transcribed a standardized quantity of 1 µg RNA per sample using a random hexamer primer (0.1 nmol, 1 µl, SO142, Life Technologies), an oligo-dT18 primer (0.1 nmol, 1 µl, SO131, Life Technologies, Thermo Fisher Scientific Inc.), 5x M-MLV-buffer (4 µl, M1705, Promega, Fitchburg, WI, USA) and dNTP mix (40 nmol, 1 µl, 10 nmol/dNTP, Roti <sup>®</sup> -Mix PCR3, L785.2) ad 20 µl nuclease-free H <sub>2</sub> O (Roth BioScience Grade T143, Carl Roth GmbH & Co. KG). After incubation for 3 min at 70°C the mixture was quickly cooled on ice (RNA denaturation). We then added reverse transcriptase (200 U, 1 µl, M1705, Promega) and an RNase inhibitor (40 U, 1 µl, EO0381, Life Technologies), continued incubation at 37°C for 60 min and inactivated the reverse transcriptase by heat (95°C, 2 min). To minimize experimental variations, synthesis of cDNA, which was stored at -20°C until use, was performed concurrently for all samples.                                                                                                                                |
| Amount of RNA and reaction volume                              | E | <b>Amount of RNA:</b> 1 µg; <b>Reaction volume:</b> 22 µl                                                                                                                                                                                                                                                                                                                                                                                                                                                                                                                                                                                                                                                                                                                                                                                                                                                                                                                                                                                                                                                             |
| Priming oligonucleotide (if using GSP) and concentration       | E | 0.1 nmol random hexamer primer; 0.1 nmol oligo-dT18 primer                                                                                                                                                                                                                                                                                                                                                                                                                                                                                                                                                                                                                                                                                                                                                                                                                                                                                                                                                                                                                                                            |
| Reverse transcriptase and concentration                        | E | Reverse transcriptase (200 U, 1 µl, M1705, Promega) in a final concentration of 9.1 U/µl (200 U / 22 µl)                                                                                                                                                                                                                                                                                                                                                                                                                                                                                                                                                                                                                                                                                                                                                                                                                                                                                                                                                                                                              |
| Temperature and time                                           | E | 3 min at 70°C; 60 min at 37°C; 2 min at 95°C                                                                                                                                                                                                                                                                                                                                                                                                                                                                                                                                                                                                                                                                                                                                                                                                                                                                                                                                                                                                                                                                          |
| Manufacturer of reagents and catalogue numbers                 | D | Specified in "Complete reaction conditions".                                                                                                                                                                                                                                                                                                                                                                                                                                                                                                                                                                                                                                                                                                                                                                                                                                                                                                                                                                                                                                                                          |
| C <sub>q</sub> with → without reverse transcription            | D | The signal of the amplification plot without reverse transcriptase was very late and there was a high C <sub>q</sub> value difference between the -RT control and all cDNA samples.<br><b>GAPDH:</b> 15→29; <b>PIIB:</b> 16→34; <b>YWHAZ:</b> 22→32; <b>POLR2A:</b> 21→none; <b>TBP:</b> 23→35; <b>EEF1A1:</b> 14→27; <b>RPLP0:</b> 17→32; <b>RNA18S5:</b> 9→30; RPL22: 18→30                                                                                                                                                                                                                                                                                                                                                                                                                                                                                                                                                                                                                                                                                                                                         |
| Storage conditions of cDNA                                     | D | -20°C                                                                                                                                                                                                                                                                                                                                                                                                                                                                                                                                                                                                                                                                                                                                                                                                                                                                                                                                                                                                                                                                                                                 |
| <b>qPCR protocol</b>                                           |   |                                                                                                                                                                                                                                                                                                                                                                                                                                                                                                                                                                                                                                                                                                                                                                                                                                                                                                                                                                                                                                                                                                                       |
| Complete reaction conditions                                   | E | For qPCR amplification we used a Mastercycler <sup>®</sup> ep realplex-S thermocycler (Eppendorf AG, Hamburg, Germany) in conjunction with 96 well PCR plates (TW-MT, 712282, Biozym Scientific GmbH, Hessisch Oldendorf, Germany) and BZO Seal Filmcover sheeting (712350, Biozym Scientific GmbH). Into each well SYBR <sup>®</sup> Green JumpStart <sup>™</sup> Taq ReadyMix <sup>™</sup> (7.5 µl, Sigma-Aldrich <sup>®</sup> , S4438, St. Louis, MI, USA), consisting of Tris-HCl (20 mM, pH 8.3), KCl (100 mM), MgCl <sub>2</sub> (7 mM), dNTPs (0.4 mM per dATP,                                                                                                                                                                                                                                                                                                                                                                                                                                                                                                                                                |

|                                                            |   |                                                                                                                                                                                                                                                                                                                                                                                                                                                                                                                                                                                                                                                                                                                                                                                                                                                                                                                                                                                                     |
|------------------------------------------------------------|---|-----------------------------------------------------------------------------------------------------------------------------------------------------------------------------------------------------------------------------------------------------------------------------------------------------------------------------------------------------------------------------------------------------------------------------------------------------------------------------------------------------------------------------------------------------------------------------------------------------------------------------------------------------------------------------------------------------------------------------------------------------------------------------------------------------------------------------------------------------------------------------------------------------------------------------------------------------------------------------------------------------|
|                                                            |   | dCTP, dGTP, dTTP), stabilizers, Taq-DNA-polymerase (0.05 U/μl), JumpStart Taq antibody and SYBR Green I, as well as the respective cDNA-solution (1.5 μl, dilution 1:10) and the respective primer pair (7.5 pmol, 0.75 μl - 3.75 pmol/primer) were pipetted ad 15 μl nuclease-free H <sub>2</sub> O (BioScience Grade T143, Carl Roth GmbH & Co. KG). A master-mix of all components except the cDNA solution was created to minimize technical errors during manual pipetting. We then amplified the cDNA in triplets (technical replicates) per candidate reference gene in 45 cycles (initial heat activation 95°C/5 min, per cycle 95°C/10 s denaturation, 60°C/8 s annealing, 72°C/8 s extension). At the end of each extension step SYBR Green I fluorescence was measured at 521 nm. For each biological replicate all genes were amplified in triplet on the same qPCR plate to minimize biasing effects of possible inter-run variations on relative reference gene stability assessment. |
| Reaction volume and amount of cDNA/DNA                     | E | <b>Reaction volume:</b> 15 μl; <b>Amount of cDNA:</b> 1.5 μl of an 1:10 dilution of the cDNA stock solution                                                                                                                                                                                                                                                                                                                                                                                                                                                                                                                                                                                                                                                                                                                                                                                                                                                                                         |
| Primer, (probe), Mg <sub>2</sub> , and dNTP concentrations | E | 3.75 pmol/primer; 3.5 mM MgCl <sub>2</sub> ; 0.2 mM dNTP; 50 mM KCl                                                                                                                                                                                                                                                                                                                                                                                                                                                                                                                                                                                                                                                                                                                                                                                                                                                                                                                                 |
| Polymerase identity and concentration                      | E | Taq-DNA polymerase in a final concentration of 0.025 U/μl (SYBR <sup>®</sup> Green JumpStart <sup>™</sup> Taq ReadyMix <sup>™</sup> , Sigma–Aldrich <sup>®</sup> , S4438, St. Louis, MI, USA)                                                                                                                                                                                                                                                                                                                                                                                                                                                                                                                                                                                                                                                                                                                                                                                                       |
| Buffer/kit identity and manufacturer                       | E | SYBR <sup>®</sup> Green JumpStart <sup>™</sup> Taq ReadyMix <sup>™</sup> (Sigma–Aldrich <sup>®</sup> , S4438, St. Louis, MI, USA)                                                                                                                                                                                                                                                                                                                                                                                                                                                                                                                                                                                                                                                                                                                                                                                                                                                                   |
| Exact chemical composition of the buffer                   | D | 20 mM Tris–HCl, pH 8.3, final concentration 10 mM                                                                                                                                                                                                                                                                                                                                                                                                                                                                                                                                                                                                                                                                                                                                                                                                                                                                                                                                                   |
| Additives (SYBR Green I, DMSO, and so forth)               | E | SYBR Green I, stabilizers, JumpStart Taq antibody, KCl, MgCl <sub>2</sub>                                                                                                                                                                                                                                                                                                                                                                                                                                                                                                                                                                                                                                                                                                                                                                                                                                                                                                                           |
| Manufacturer of plates/tubes and catalogue number          | D | 96 well PCR plates (TW-MT, 712282, Biozym Scientific GmbH, Hessisch Oldendorf, Germany) in combination with BZO Seal Filmcover sheeting (712350, Biozym Scientific GmbH)                                                                                                                                                                                                                                                                                                                                                                                                                                                                                                                                                                                                                                                                                                                                                                                                                            |
| Complete thermocycling parameters                          | E | Initial heat activation 95°C/5min; per cycle 95°C/10s denaturation, 60°C/8s annealing, 72°C/8s extension                                                                                                                                                                                                                                                                                                                                                                                                                                                                                                                                                                                                                                                                                                                                                                                                                                                                                            |
| Reaction setup (manual/robotic)                            | D | manual                                                                                                                                                                                                                                                                                                                                                                                                                                                                                                                                                                                                                                                                                                                                                                                                                                                                                                                                                                                              |
| Manufacturer of qPCR instrument                            | D | Mastercycler <sup>®</sup> ep realplex-S thermocycler (Eppendorf AG, Hamburg, Germany)                                                                                                                                                                                                                                                                                                                                                                                                                                                                                                                                                                                                                                                                                                                                                                                                                                                                                                               |
| <b>qPCR validation</b>                                     |   |                                                                                                                                                                                                                                                                                                                                                                                                                                                                                                                                                                                                                                                                                                                                                                                                                                                                                                                                                                                                     |
| Evidence of optimization                                   | D | Primer optimization is evidenced by melting curve analysis and agarose gel electrophoresis (specificity), qPCR efficiency, technical reliability and in silico secondary structure analysis of primers and amplicons. Melting temperatures T <sub>m</sub> of primers as validated by the manufacturer Eurofins MWG Operon LLC (Huntsville, AL, USA; High Purity Salt Free Purification HPSF <sup>®</sup> ) are provided in Table 1.                                                                                                                                                                                                                                                                                                                                                                                                                                                                                                                                                                 |
| Specificity (gel, sequence, melt or digest)                | E | Specific amplification of target reference genes was assessed by agarose gel electrophoreses (single band, correct size) and a specific peak in melting curve analysis (95°C for 15s, 60°C for 15s, then continuous temperature increase to 95°C and fluorescence measurement for 20 min). For each primer pair and qPCR run we also tested a no-template-control (NTC) without cDNA and a -RT control (cDNA synthesis without enzyme reverse transcriptase added) on the same plate to exclude possible bias by unspecific amplification (primer dimers, contaminating or genomic DNA). (Figure 1, Supplementary Data 3).                                                                                                                                                                                                                                                                                                                                                                          |

|                                                |   |                                                                                                                                                                                                                                                                                                                                                                                                                                                                                                      |
|------------------------------------------------|---|------------------------------------------------------------------------------------------------------------------------------------------------------------------------------------------------------------------------------------------------------------------------------------------------------------------------------------------------------------------------------------------------------------------------------------------------------------------------------------------------------|
| For SYBR Green I, C <sub>q</sub> of the NTC    | E | The signal of the amplification plot during efficiency analysis for standard curve generation was very late and there was a high C <sub>q</sub> value difference between the negative control and all cDNA dilutions.<br><b>GAPDH:</b> 40; <b>PPIB:</b> 36; <b>YWHAZ:</b> none; <b>POLR2A:</b> 37; <b>TBP:</b> none; <b>EEF1A1:</b> none; <b>RPLP0:</b> 40; <b>RNA18S5:</b> 35; <b>RPL22:</b> none. (Supplementary Data 4)                                                                           |
| Calibration curves with slope and y intercept  | E | <b>GAPDH:</b> $y=1E+9e^{-0.659x}$ , slope: -3.480; <b>PPIB:</b> $y=5E+9e^{-0.651x}$ , slope: -3.508; <b>YWHAZ:</b> $y=6E+9e^{-0.651x}$ , slope: -3.488; <b>POLR2A:</b> $y=4E+10e^{-0.651x}$ , slope: -3.520; <b>TBP:</b> $y=3E+12e^{-0.649x}$ , slope: -3.538; <b>EEF1A1:</b> $y=7E+9e^{-0.685x}$ , slope: -3.315; <b>RPLP0:</b> $y=2E+9e^{-0.646x}$ , slope: -3.509; <b>RNA18S5:</b> $y=2E+6e^{0.677x}$ , slope: -3.319; <b>RPL22:</b> $y=1E+10e^{-0.671x}$ , slope: -3.403. (Supplementary Data 4) |
| PCR efficiency calculated from slope           | E | <b>GAPDH:</b> 93.8%; <b>PPIB:</b> 92.8%; <b>YWHAZ:</b> 93.5%; <b>POLR2A:</b> 92.3%; <b>TBP:</b> 91.7%; <b>EEF1A1:</b> 100.3%; <b>RPLP0:</b> 92.7%; <b>RNA18S5:</b> 100.1%; <b>RPL22:</b> 96.7%. (Table 2, Supplementary Data 4)                                                                                                                                                                                                                                                                      |
| CIs for PCR efficiency or SE                   | D | CIs of qPCR efficiencies E were calculated for all genes tested and are given in Supplementary Data 4.                                                                                                                                                                                                                                                                                                                                                                                               |
| R <sup>2</sup> of calibration curve            | E | <b>GAPDH:</b> 0.9998; <b>PPIB:</b> 0.9996; <b>YWHAZ:</b> 0.9993; <b>POLR2A:</b> 0.9984; <b>TBP:</b> 0.9974; <b>EEF1A1:</b> 0.9951; <b>RPLP0:</b> 0.9992; <b>RNA18S5:</b> 0.9974; <b>RPL22:</b> 0.9949. (Table 2, Supplementary Data 4)                                                                                                                                                                                                                                                               |
| Linear dynamic range (LDR)                     | E | The linear dynamic range (LDR) included the used 1:10 cDNA dilution in all cases and ranged from 3x log <sub>10</sub> (cDNA stock dilution 1:10 – 1:10 <sup>3</sup> ) to 6x log <sub>10</sub> (cDNA stock dilution 1:10 – 1:10 <sup>6</sup> ) for the individual genes (primer pairs), see Supplementary Data 4. Standard curves were calculated only considering dilutions within the LDR. (Supplementary Data 4)                                                                                   |
| C <sub>q</sub> variation at LOD                | E | <b>GAPDH:</b> SD=0.952; <b>PPIB:</b> SD=1.77; <b>YWHAZ:</b> SD=1.696; <b>POLR2A:</b> SD=1.004; <b>TBP:</b> SD=0.561; <b>EEF1A1:</b> SD=0.405; <b>RPLP0:</b> SD=0.176; <b>RNA18S5:</b> SD=0.000; <b>RPL22:</b> SD=0.202. (Supplementary Data 4)                                                                                                                                                                                                                                                       |
| CIs throughout range                           | D | CIs of C <sub>q</sub> were calculated throughout the dilution range for all genes tested and are given in Supplementary Data 4.                                                                                                                                                                                                                                                                                                                                                                      |
| Evidence for LOD                               | E | Not detectable C <sub>q</sub> value for ≥ 1 of the technical replicates (triplet) at the corresponding cDNA dilution level indicates LOD at the previous, more concentrated dilution level. LOD for all genes (primer pairs) detected at a cDNA quantity equivalent to ≤1 pg RNA, except for TBP with an LOD of 100 pg RNA equivalent (weak signal at 10 pg and 1 pg). (Supplementary Data 4)                                                                                                        |
| If multiplex, efficiency and LOD of each assay | E | Not applicable.                                                                                                                                                                                                                                                                                                                                                                                                                                                                                      |
| <b>Data analysis</b>                           |   |                                                                                                                                                                                                                                                                                                                                                                                                                                                                                                      |
| qPCR analysis program (source, version)        | E | Mastercycler ep realplex software, version 2.2 (Eppendorf AG, Hamburg, Germany)                                                                                                                                                                                                                                                                                                                                                                                                                      |
| Method of C <sub>q</sub> determination         | E | Second derivative maximum method (CalqPlex algorithm, Automatic Baseline, Drift Correction On)                                                                                                                                                                                                                                                                                                                                                                                                       |
| Outlier identification and disposition         | E | For analysis none of the C <sub>q</sub> values was discarded.                                                                                                                                                                                                                                                                                                                                                                                                                                        |
| Results for NTCs                               | E | The signal of the amplification plot was very late and there was a high C <sub>q</sub> value difference between the negative control and all cDNA samples. <b>GAPDH:</b> 33; <b>PPIB:</b> 35; <b>YWHAZ:</b> 36; <b>POLR2A:</b> 36; <b>TBP:</b> none; <b>EEF1A1:</b> 35; <b>RPLP0:</b> none; <b>RNA18S5:</b> 35; <b>RPL22:</b> none.                                                                                                                                                                  |

|                                                       |   |                                                                                                                                                                                                                                                                                                                                                                                                                                                                                                                                                                                                                                                                                                                                                                                                                                                                                                                                                                                                                                                                                                                                                                                                                                                                                                                                                                                                                                                                                                                                                                                                                                                                                                                                                                                                                                                                                                                                                                                                                                                                                                                                                                                                                                                          |
|-------------------------------------------------------|---|----------------------------------------------------------------------------------------------------------------------------------------------------------------------------------------------------------------------------------------------------------------------------------------------------------------------------------------------------------------------------------------------------------------------------------------------------------------------------------------------------------------------------------------------------------------------------------------------------------------------------------------------------------------------------------------------------------------------------------------------------------------------------------------------------------------------------------------------------------------------------------------------------------------------------------------------------------------------------------------------------------------------------------------------------------------------------------------------------------------------------------------------------------------------------------------------------------------------------------------------------------------------------------------------------------------------------------------------------------------------------------------------------------------------------------------------------------------------------------------------------------------------------------------------------------------------------------------------------------------------------------------------------------------------------------------------------------------------------------------------------------------------------------------------------------------------------------------------------------------------------------------------------------------------------------------------------------------------------------------------------------------------------------------------------------------------------------------------------------------------------------------------------------------------------------------------------------------------------------------------------------|
| Justification of number and choice of reference genes | E | Aim of this study - identification of optimal number and choice of reference genes for hPDL fibroblasts under physiological conditions, in a model for orthodontic tooth movement and a model for bacterial periodontitis.                                                                                                                                                                                                                                                                                                                                                                                                                                                                                                                                                                                                                                                                                                                                                                                                                                                                                                                                                                                                                                                                                                                                                                                                                                                                                                                                                                                                                                                                                                                                                                                                                                                                                                                                                                                                                                                                                                                                                                                                                               |
| Description of normalization method                   | E | Samples were not normalized, since apart from the reference genes no target genes were quantified.                                                                                                                                                                                                                                                                                                                                                                                                                                                                                                                                                                                                                                                                                                                                                                                                                                                                                                                                                                                                                                                                                                                                                                                                                                                                                                                                                                                                                                                                                                                                                                                                                                                                                                                                                                                                                                                                                                                                                                                                                                                                                                                                                       |
| Number and concordance of biological replicates       | D | N = 1 (pool of hPDL fibroblasts from 4 different patients); n = 6 (pool cells seeded in 6 different wells per experimental group as biological replicates).                                                                                                                                                                                                                                                                                                                                                                                                                                                                                                                                                                                                                                                                                                                                                                                                                                                                                                                                                                                                                                                                                                                                                                                                                                                                                                                                                                                                                                                                                                                                                                                                                                                                                                                                                                                                                                                                                                                                                                                                                                                                                              |
| Number and stage (RT or qPCR) of technical replicates | E | qPCR reactions were performed in triplets (technical replicates n = 3).                                                                                                                                                                                                                                                                                                                                                                                                                                                                                                                                                                                                                                                                                                                                                                                                                                                                                                                                                                                                                                                                                                                                                                                                                                                                                                                                                                                                                                                                                                                                                                                                                                                                                                                                                                                                                                                                                                                                                                                                                                                                                                                                                                                  |
| Repeatability (intraassay variation)                  | E | The maximum SD (of the mean) across all biological replicates (n=18) of the means of C <sub>q</sub> from the three technical replicates was ≤0.553 in all instances.<br><b>GAPDH: 0.24; PPIB: 0.29; YWHAZ: 0.32; POLR2A: 0.35; TBP: 0.27; EEF1A1: 0.53; RPLP0: 0.36; RNA18S5: 0.20; RPL22: 0.33.</b> (Table 2)                                                                                                                                                                                                                                                                                                                                                                                                                                                                                                                                                                                                                                                                                                                                                                                                                                                                                                                                                                                                                                                                                                                                                                                                                                                                                                                                                                                                                                                                                                                                                                                                                                                                                                                                                                                                                                                                                                                                           |
| Reproducibility (interassay variation, CV)            | D | High biological reproducibility was achieved as evidenced by the low SD of raw C <sub>q</sub> values for all genes and experimental groups tested (see Figure 2, Supplementary Table 3).                                                                                                                                                                                                                                                                                                                                                                                                                                                                                                                                                                                                                                                                                                                                                                                                                                                                                                                                                                                                                                                                                                                                                                                                                                                                                                                                                                                                                                                                                                                                                                                                                                                                                                                                                                                                                                                                                                                                                                                                                                                                 |
| Power analysis                                        | D | The number of biological replicates (n = 6) was based on previous studies and corresponds to the number of replicates generally used in cell culture RT-qPCR experiments.                                                                                                                                                                                                                                                                                                                                                                                                                                                                                                                                                                                                                                                                                                                                                                                                                                                                                                                                                                                                                                                                                                                                                                                                                                                                                                                                                                                                                                                                                                                                                                                                                                                                                                                                                                                                                                                                                                                                                                                                                                                                                |
| Statistical methods for results significance          | E | All biological samples (n = 6) were measured in triplicate (n = 3) and an arithmetic mean of each C <sub>q</sub> triplet used for further analysis. The stability of each candidate was calculated with four different mathematical algorithms: geNorm, NormFinder, BestKeeper and the comparative ΔC <sub>q</sub> method. Stability calculations were done with the official Microsoft-Excel-based software applets for geNorm, NormFinder and BestKeeper according to developers' instructions. For the comparative ΔC <sub>q</sub> method manual calculations were performed. The geNorm and NormFinder algorithms require the transformation of the raw C <sub>q</sub> data to linear scale expression quantities Q corresponding to the qPCR efficiency (E) of each gene: $Q = E^{-(C_{qmin} - C_{qsample})}$ with the lowest C <sub>q</sub> value corresponding to a quantity of 1 for each candidate reference gene. The genes were ranked according to their stability values (geNorm: M, NormFinder: $\rho_{ig}/\sigma_i$ , deltaCT: mean SD of ΔC <sub>q</sub> ; BestKeeper: Pearson's r) for each algorithm and each experimental condition as well as combined experimental conditions (no treatment + compressive force, no treatment + Agac) and a rank sum of all algorithms calculated per gene for final stability assessment with the smallest rank sum indicating the most stable reference gene. Also a pooled overall ranking for all experimental conditions was calculated. The geNorm algorithm was used to calculate the ideal number of reference genes for reliable RT-qPCR normalization. If pairwise variation ( $V_n/V_{n+1}$ ) between two sets of reference genes with one set including an additional reference gene was ≤0.15, this additional gene was deemed unnecessary for normalization. To assess ranking variations between the algorithms, we used IBM SPSS Statistics® 23 (IBM, Armonk, NY, USA) to create a correlation matrix of bivariate correlations (Pearson's correlation coefficient r, normality confirmed by Shapiro-Wilk tests and histogram evaluation) of the overall pooled stability values as calculated by two respective algorithms. (see Figures 3 and 4, Table 3, Supplementary Table 4). |
| Software (source, version)                            | E | Microsoft Excel 2010 (Microsoft Corporation, Redmond, USA); IBM SPSS Statistics® 23 (IBM, Armonk, NY, USA)                                                                                                                                                                                                                                                                                                                                                                                                                                                                                                                                                                                                                                                                                                                                                                                                                                                                                                                                                                                                                                                                                                                                                                                                                                                                                                                                                                                                                                                                                                                                                                                                                                                                                                                                                                                                                                                                                                                                                                                                                                                                                                                                               |



|                                                 |   |                                                                                                                                                                                                                                                                                                                                                                                                                                                                                                                                                                                                                                                                                                                                                                                                                                                                                                                                                                                                                                                                                                           |
|-------------------------------------------------|---|-----------------------------------------------------------------------------------------------------------------------------------------------------------------------------------------------------------------------------------------------------------------------------------------------------------------------------------------------------------------------------------------------------------------------------------------------------------------------------------------------------------------------------------------------------------------------------------------------------------------------------------------------------------------------------------------------------------------------------------------------------------------------------------------------------------------------------------------------------------------------------------------------------------------------------------------------------------------------------------------------------------------------------------------------------------------------------------------------------------|
| C <sub>q</sub> or raw data submission           | D | Raw C <sub>q</sub> values are provided in Figure 2 and Supplementary Table 3.                                                                                                                                                                                                                                                                                                                                                                                                                                                                                                                                                                                                                                                                                                                                                                                                                                                                                                                                                                                                                             |
| <b>qPCR target information</b>                  |   |                                                                                                                                                                                                                                                                                                                                                                                                                                                                                                                                                                                                                                                                                                                                                                                                                                                                                                                                                                                                                                                                                                           |
| Gene symbol                                     | E | Provided in Table 1. We based our primer design on the officially registered target gene nucleotide sequences from the NCBI Nucleotide database (GeneBank, access: <a href="http://www.ncbi.nlm.nih.gov/nuccore">http://www.ncbi.nlm.nih.gov/nuccore</a> ).                                                                                                                                                                                                                                                                                                                                                                                                                                                                                                                                                                                                                                                                                                                                                                                                                                               |
| Sequence accession number                       | E |                                                                                                                                                                                                                                                                                                                                                                                                                                                                                                                                                                                                                                                                                                                                                                                                                                                                                                                                                                                                                                                                                                           |
| Location of amplicon                            | D | Provided in Table 1.                                                                                                                                                                                                                                                                                                                                                                                                                                                                                                                                                                                                                                                                                                                                                                                                                                                                                                                                                                                                                                                                                      |
| Amplicon length                                 | E | Provided in Table 1. Target amplicon sequences were chosen to range from 60 to 150 bp with a GC content of 35–65%.                                                                                                                                                                                                                                                                                                                                                                                                                                                                                                                                                                                                                                                                                                                                                                                                                                                                                                                                                                                        |
| In silico specificity screen (BLAST, and so on) | E | Provided in Table 1. In-silico specificity of constructed primers was ensured by PrimerBLAST (National Center for Biotechnology Information, Bethesda MD, USA, <a href="https://www.ncbi.nlm.nih.gov/tools/primer-blast">https://www.ncbi.nlm.nih.gov/tools/primer-blast</a> ; RefSeq mRNA, Splice variants allowed, Max. Product Size: 4000) and cross-checked using the UCSC in-silico-PCR Genome Browser (Dec. 2013 GRCh38/hg38; UCSC Genes; Max. Product Size: 4000; Min. Perfect Match: 15; Min. Good Match: 15; Jim Kent, <a href="http://genome-mirror.genomedk.au.dk/cgi-bin/hgPcr">http://genome-mirror.genomedk.au.dk/cgi-bin/hgPcr</a> ). Intron-flanking primer pairs were designed to prevent a co-amplification of genomic DNA and checked in silico for sufficient absence of hairpin structures and dimer formation at annealing temperature ( $\Delta G \geq -3,5$ kcal/mol, BeaconDesigner™ Free Edition, Premier BioSoft International, Palo Alto, CA, USA, <a href="http://www.premierbiosoft.com/qOligo/Oligo.jsp?PID=1">http://www.premierbiosoft.com/qOligo/Oligo.jsp?PID=1</a> ). |
| Pseudogenes, retropseudogenes or other homologs | D | Sequence alignment, possible splicing and targeted transcript variants as well as absence of targeted pseudogenes, retropseudogenes or other homologs were assessed upon primer construction by NCBI PrimerBLAST (National Center for Biotechnology Information, Bethesda MD, USA, <a href="https://www.ncbi.nlm.nih.gov/tools/primer-blast">https://www.ncbi.nlm.nih.gov/tools/primer-blast</a> ) and PrimerCheck (SpliceCenter der Genomics and Bioinformatics Group, LMP, CCR, NCI, <a href="http://projects.insilico.us/SpliceCenter/PrimerCheck.jsp">http://projects.insilico.us/SpliceCenter/PrimerCheck.jsp</a> ).                                                                                                                                                                                                                                                                                                                                                                                                                                                                                 |
| Sequence alignment                              | D |                                                                                                                                                                                                                                                                                                                                                                                                                                                                                                                                                                                                                                                                                                                                                                                                                                                                                                                                                                                                                                                                                                           |
| Secondary structure analysis of amplicon        | D | Provided in Supplementary Data 1. No secondary structures present at annealing temperature (60°C) were detected as determined in silico by UNAFold ( <a href="http://eu.idtdna.com/UNAFold?">http://eu.idtdna.com/UNAFold?</a> , Suboptimality 50%; Integrated DNA Technologies Inc., Coralville, IA, USA).                                                                                                                                                                                                                                                                                                                                                                                                                                                                                                                                                                                                                                                                                                                                                                                               |
| Location of each primer by exon or intron       | E | Provided in Table 1. Also see Supplementary Data 1.                                                                                                                                                                                                                                                                                                                                                                                                                                                                                                                                                                                                                                                                                                                                                                                                                                                                                                                                                                                                                                                       |
| What splice variants are targeted               | E | Provided in Table 1. Also see Supplementary Data 1.                                                                                                                                                                                                                                                                                                                                                                                                                                                                                                                                                                                                                                                                                                                                                                                                                                                                                                                                                                                                                                                       |
| <b>qPCR oligonucleotides</b>                    |   |                                                                                                                                                                                                                                                                                                                                                                                                                                                                                                                                                                                                                                                                                                                                                                                                                                                                                                                                                                                                                                                                                                           |
| Primer sequences                                | E | Provided in Table 1.                                                                                                                                                                                                                                                                                                                                                                                                                                                                                                                                                                                                                                                                                                                                                                                                                                                                                                                                                                                                                                                                                      |
| RTPrimerDB identification number                | D | Not applicable, primers were constructed and validated by the authors.                                                                                                                                                                                                                                                                                                                                                                                                                                                                                                                                                                                                                                                                                                                                                                                                                                                                                                                                                                                                                                    |
| Probe sequences                                 | D | Not applicable.                                                                                                                                                                                                                                                                                                                                                                                                                                                                                                                                                                                                                                                                                                                                                                                                                                                                                                                                                                                                                                                                                           |
| Location and identity of any modifications      | E | Primers received no terminal or other modifications.                                                                                                                                                                                                                                                                                                                                                                                                                                                                                                                                                                                                                                                                                                                                                                                                                                                                                                                                                                                                                                                      |
| Manufacturer of oligonucleotides                | D | Primers were synthesized by Eurofins MWG Operon LLC (Huntsville, AL, USA).                                                                                                                                                                                                                                                                                                                                                                                                                                                                                                                                                                                                                                                                                                                                                                                                                                                                                                                                                                                                                                |
| Purification method                             | D | Primers were purified by High Purity Salt Free Purification HPSF® (Eurofins MWG Operon LLC).                                                                                                                                                                                                                                                                                                                                                                                                                                                                                                                                                                                                                                                                                                                                                                                                                                                                                                                                                                                                              |

**Supplementary Table 2.** Yield (quantity) and quality of extracted total RNA per biological replicate (well).

| Sample ID       | Nucleic Acid Concentration | Unit  | A260   | A280  | A260/A280 | Sample Type | Factor |
|-----------------|----------------------------|-------|--------|-------|-----------|-------------|--------|
| Control K7      | 450.8                      | ng/μl | 11.269 | 5.757 | 1.96      | RNA         | 40     |
| Control K8      | 495.4                      | ng/μl | 12.385 | 6.415 | 1.93      | RNA         | 40     |
| Control K9      | 488.2                      | ng/μl | 12.206 | 6.494 | 1.88      | RNA         | 40     |
| Control K10     | 486.2                      | ng/μl | 12.156 | 6.407 | 1.9       | RNA         | 40     |
| Control K11     | 444.4                      | ng/μl | 11.11  | 5.793 | 1.92      | RNA         | 40     |
| Control K12     | 472.8                      | ng/μl | 11.82  | 6.125 | 1.93      | RNA         | 40     |
| Compression D7  | 295.1                      | ng/μl | 7.377  | 3.922 | 1.88      | RNA         | 40     |
| Compression D8  | 291.6                      | ng/μl | 7.29   | 3.826 | 1.91      | RNA         | 40     |
| Compression D9  | 225.2                      | ng/μl | 5.631  | 3.002 | 1.88      | RNA         | 40     |
| Compression D10 | 225.9                      | ng/μl | 5.647  | 3.098 | 1.82      | RNA         | 40     |
| Compression D11 | 218.6                      | ng/μl | 5.464  | 2.934 | 1.86      | RNA         | 40     |
| Compression D12 | 298.9                      | ng/μl | 7.473  | 3.952 | 1.89      | RNA         | 40     |
| Agac7           | 441                        | ng/μl | 11.026 | 5.873 | 1.88      | RNA         | 40     |
| Agac8           | 245.5                      | ng/μl | 6.138  | 3.262 | 1.88      | RNA         | 40     |
| Agac9           | 303                        | ng/μl | 7.575  | 3.935 | 1.93      | RNA         | 40     |
| Agac10          | 456.7                      | ng/μl | 11.417 | 6.052 | 1.89      | RNA         | 40     |
| Agac11          | 295.2                      | ng/μl | 7.38   | 3.902 | 1.89      | RNA         | 40     |
| Agac12          | 312.6                      | ng/μl | 7.814  | 4.149 | 1.88      | RNA         | 40     |

A = absorbance = optical density (OD) at 260nm and 280nm; A260/A280 = absorbance ratio.

Factor = ng/μl total RNA per 1 unit OD<sub>260nm</sub>.

**Supplementary Table 3.** Raw C<sub>q</sub> values of RT-qPCR (triplet means) for 3 experimental groups and 9 candidate reference genes.

| <b>RAW C<sub>q</sub> values</b>     |              | Gene         | Gene        | Gene         | Gene          | Gene       | Gene         | Gene         | Gene          | Gene           |
|-------------------------------------|--------------|--------------|-------------|--------------|---------------|------------|--------------|--------------|---------------|----------------|
| <b>Sample</b>                       | <b>Group</b> | <b>GAPDH</b> | <b>PPIB</b> | <b>YWHAZ</b> | <b>POLR2A</b> | <b>TBP</b> | <b>RPL22</b> | <b>RPLP0</b> | <b>EEF1A1</b> | <b>RNA18S5</b> |
| Control K7                          | 1            | 15.04        | 16.43       | 21.81        | 20.96         | 23.35      | 18.22        | 16.34        | 14.17         | 8.67           |
| Control K8                          | 1            | 15.14        | 16.40       | 21.73        | 21.03         | 23.29      | 18.13        | 16.18        | 14.14         | 8.42           |
| Control K9                          | 1            | 15.14        | 16.36       | 21.51        | 20.77         | 23.30      | 18.00        | 16.33        | 14.09         | 7.91           |
| Control K10                         | 1            | 15.26        | 16.51       | 21.60        | 20.83         | 23.47      | 18.21        | 16.24        | 14.12         | 8.33           |
| Control K11                         | 1            | 15.04        | 16.30       | 21.21        | 21.00         | 23.46      | 17.95        | 16.06        | 14.02         | 8.41           |
| Control K12                         | 1            | 15.09        | 16.36       | 21.00        | 20.60         | 23.12      | 17.93        | 16.22        | 14.06         | 7.81           |
| Compression D7                      | 2            | 15.13        | 16.98       | 22.57        | 21.78         | 24.08      | 18.39        | 16.37        | 14.26         | 8.97           |
| Compression D8                      | 2            | 14.85        | 16.75       | 22.14        | 21.50         | 23.72      | 18.19        | 16.26        | 13.91         | 8.57           |
| Compression D9                      | 2            | 14.70        | 16.80       | 21.74        | 21.66         | 23.75      | 18.26        | 16.42        | 13.97         | 8.52           |
| Compression D10                     | 2            | 15.05        | 16.74       | 21.11        | 21.45         | 23.50      | 18.20        | 16.46        | 13.97         | 8.08           |
| Compression D11                     | 2            | 15.11        | 16.52       | 21.01        | 21.51         | 23.64      | 17.95        | 16.26        | 13.75         | 8.27           |
| Compression D12                     | 2            | 14.85        | 16.71       | 21.28        | 21.57         | 23.67      | 18.21        | 16.06        | 13.85         | 8.05           |
| Agac7                               | 3            | 15.58        | 16.43       | 21.84        | 21.07         | 23.32      | 17.82        | 16.19        | 14.15         | 8.76           |
| Agac8                               | 3            | 15.41        | 16.63       | 21.46        | 21.45         | 23.67      | 18.36        | 16.55        | 14.44         | 8.46           |
| Agac9                               | 3            | 15.27        | 16.48       | 20.97        | 21.18         | 23.46      | 18.21        | 16.42        | 14.41         | 7.99           |
| Agac10                              | 3            | 15.37        | 16.48       | 21.03        | 21.15         | 23.43      | 18.36        | 16.43        | 14.37         | 8.02           |
| Agac11                              | 3            | 15.58        | 16.71       | 21.04        | 21.36         | 23.69      | 18.41        | 16.83        | 14.57         | 8.32           |
| Agac12                              | 3            | 15.40        | 16.66       | 20.89        | 21.09         | 23.50      | 18.35        | 16.65        | 14.46         | 7.91           |
| <b>C<sub>q</sub> SD Control</b>     | 1            | 0.08         | 0.07        | 0.31         | 0.16          | 0.13       | 0.13         | 0.10         | 0.05          | 0.33           |
| <b>C<sub>q</sub> SD Compression</b> | 2            | 0.17         | 0.15        | 0.62         | 0.12          | 0.19       | 0.14         | 0.15         | 0.17          | 0.35           |
| <b>C<sub>q</sub> SD Agac</b>        | 3            | 0.12         | 0.12        | 0.37         | 0.15          | 0.14       | 0.22         | 0.22         | 0.14          | 0.33           |

C<sub>q</sub> = quantification cycle; SD = standard deviation of group mean. Gene symbols see Table 1. Agac = *Aggregatibacter actinomycetemcomitans* (periodontitis)

**Supplementary Table 4.** Gene stability ranking for individual experimental groups of the nine analysed candidate reference genes according to their expression stability as calculated by the algorithms geNorm, NormFinder, comparative  $\Delta C_q$  and BestKeeper.

| Rank                                                                                                       | Total<br>(of 4 methods) |           | geNorm        |                     | NormFinder    |                                          |                | comparative $\Delta C_q$ |                                                 | BestKeeper     |                     |                 |               |
|------------------------------------------------------------------------------------------------------------|-------------------------|-----------|---------------|---------------------|---------------|------------------------------------------|----------------|--------------------------|-------------------------------------------------|----------------|---------------------|-----------------|---------------|
|                                                                                                            | Ranking order           | Rank sum  | Ranking order | Stability value (M) | Ranking order | Stability value ( $\rho_{ij}/\sigma_i$ ) | Standard error | Ranking order            | Stability value (mean SD of mean $\Delta C_q$ ) | Ranking order  | Stability value (r) | SD (+/- $C_q$ ) | CV (% $C_q$ ) |
| Untreated control (physiological conditions)                                                               |                         |           |               |                     |               |                                          |                |                          |                                                 |                |                     |                 |               |
| 1.)                                                                                                        | <b>RPL22</b>            | <b>7</b>  | <b>EEF1A1</b> | <b>0.138</b>        | <b>RPL22</b>  | <b>0.005</b>                             | <b>0.082</b>   | <b>EEF1A1</b>            | <b>0.146</b>                                    | <b>RNA18S5</b> | <b>0.915</b>        | <b>0.266</b>    | <b>3.216</b>  |
| 2.)                                                                                                        | <b>EEF1A1</b>           | <b>9</b>  | <b>PPIB</b>   | <b>0.142</b>        | <b>EEF1A1</b> | <b>0.045</b>                             | <b>0.024</b>   | <b>RPL22</b>             | <b>0.147</b>                                    | <b>RPL22</b>   | <b>0.903</b>        | <b>0.113</b>    | <b>0.627</b>  |
| 3.)                                                                                                        | PPIB                    | 14        | <b>RPL22</b>  | <b>0.142</b>        | PPIB          | 0.055                                    | 0.025          | PPIB                     | 0.147                                           | YWHAZ          | 0.890               | 0.248           | 1.154         |
| 4.)                                                                                                        | TBP                     | 20        | GAPDH         | 0.164               | TBP           | 0.070                                    | 0.028          | GAPDH                    | 0.173                                           | POLR2A         | 0.771               | 0.132           | 0.631         |
| 5.)                                                                                                        | GAPDH                   | 23        | TBP           | 0.165               | POLR2A        | 0.073                                    | 0.029          | TBP                      | 0.177                                           | <b>EEF1A1</b>  | <b>0.735</b>        | <b>0.043</b>    | <b>0.307</b>  |
| 6.)                                                                                                        | POLR2A                  | 23        | RPLP0         | 0.175               | GAPDH         | 0.086                                    | 0.032          | RPLP0                    | 0.182                                           | TBP            | 0.621               | 0.095           | 0.407         |
| 7.)                                                                                                        | RPLP0                   | 27        | POLR2A        | 0.178               | RPLP0         | 0.091                                    | 0.033          | POLR2A                   | 0.188                                           | PPIB           | 0.579               | 0.053           | 0.325         |
| 8.)                                                                                                        | YWHAZ                   | 27        | YWHAZ         | 0.248               | YWHAZ         | 0.148                                    | 0.049          | YWHAZ                    | 0.266                                           | RPLP0          | 0.186               | 0.075           | 0.462         |
| 9.)                                                                                                        | RNA18S5                 | 28        | RNA18S5       | 0.290               | RNA18S5       | 0.187                                    | 0.061          | RNA18S5                  | 0.290                                           | GAPDH          | 0.127               | 0.062           | 0.408         |
| Compressive orthodontic force (model for orthodontic tooth movement)                                       |                         |           |               |                     |               |                                          |                |                          |                                                 |                |                     |                 |               |
| 1.)                                                                                                        | <b>EEF1A1</b>           | <b>9</b>  | <b>PPIB</b>   | <b>0.177</b>        | <b>EEF1A1</b> | <b>0.012</b>                             | <b>0.072</b>   | <b>PPIB</b>              | <b>0.185</b>                                    | <b>RNA18S5</b> | <b>0.958</b>        | <b>0.277</b>    | <b>3.290</b>  |
| 2.)                                                                                                        | <b>PPIB</b>             | <b>10</b> | <b>EEF1A1</b> | <b>0.181</b>        | <b>TBP</b>    | <b>0.021</b>                             | <b>0.045</b>   | <b>EEF1A1</b>            | <b>0.187</b>                                    | <b>RPL22</b>   | <b>0.938</b>        | <b>0.508</b>    | <b>2.349</b>  |
| 3.)                                                                                                        | TBP                     | 15        | POLR2A        | 0.190               | <b>PPIB</b>   | <b>0.036</b>                             | <b>0.034</b>   | RPL22                    | 0.200                                           | YWHAZ          | 0.913               | 0.126           | 0.529         |
| 4.)                                                                                                        | POLR2A                  | 17        | RPL22         | 0.190               | POLR2A        | 0.065                                    | 0.033          | POLR2A                   | 0.201                                           | POLR2A         | 0.905               | 0.115           | 0.824         |
| 5.)                                                                                                        | RPL22                   | 18        | TBP           | 0.194               | RPL22         | 0.067                                    | 0.034          | TBP                      | 0.203                                           | <b>EEF1A1</b>  | <b>0.872</b>        | <b>0.093</b>    | <b>0.557</b>  |
| 6.)                                                                                                        | RNA18S5                 | 23        | RPLP0         | 0.246               | RPLP0         | 0.131                                    | 0.047          | RPLP0                    | 0.258                                           | TBP            | 0.804               | 0.094           | 0.438         |
| 7.)                                                                                                        | RPLP0                   | 26        | GAPDH         | 0.279               | RNA18S5       | 0.140                                    | 0.050          | RNA18S5                  | 0.286                                           | PPIB           | 0.752               | 0.087           | 0.476         |
| 8.)                                                                                                        | YWHAZ                   | 29        | RNA18S5       | 0.283               | GAPDH         | 0.166                                    | 0.057          | GAPDH                    | 0.296                                           | RPLP0          | 0.390               | 0.112           | 0.685         |
| 9.)                                                                                                        | GAPDH                   | 32        | YWHAZ         | 0.474               | YWHAZ         | 0.324                                    | 0.103          | YWHAZ                    | 0.515                                           | GAPDH          | 0.177               | 0.148           | 0.992         |
| Bacterial lysate of <i>Aggregatibacter actinomycetemcomitans</i> (Agac, model for bacterial periodontitis) |                         |           |               |                     |               |                                          |                |                          |                                                 |                |                     |                 |               |
| 1.)                                                                                                        | <b>TBP</b>              | <b>7</b>  | <b>TBP</b>    | <b>0.175</b>        | <b>TBP</b>    | <b>0.035</b>                             | <b>0.035</b>   | <b>TBP</b>               | <b>0.184</b>                                    | <b>POLR2A</b>  | <b>0.742</b>        | <b>0.126</b>    | <b>0.592</b>  |
| 2.)                                                                                                        | <b>POLR2A</b>           | <b>10</b> | <b>PPIB</b>   | <b>0.180</b>        | <b>POLR2A</b> | <b>0.038</b>                             | <b>0.034</b>   | <b>PPIB</b>              | <b>0.187</b>                                    | <b>GAPDH</b>   | <b>0.715</b>        | <b>0.097</b>    | <b>0.626</b>  |
| 3.)                                                                                                        | PPIB                    | 11        | <b>POLR2A</b> | <b>0.192</b>        | PPIB          | 0.038                                    | 0.033          | EEF1A1                   | 0.199                                           | RNA18S5        | 0.691               | 0.270           | 3.275         |
| 4.)                                                                                                        | GAPDH                   | 16        | EEF1A1        | 0.194               | GAPDH         | 0.055                                    | 0.032          | <b>POLR2A</b>            | <b>0.203</b>                                    | TBP            | 0.650               | 0.112           | 0.477         |
| 5.)                                                                                                        | EEF1A1                  | 20        | GAPDH         | 0.218               | EEF1A1        | 0.090                                    | 0.037          | GAPDH                    | 0.227                                           | PPIB           | 0.537               | 0.102           | 0.614         |
| 6.)                                                                                                        | RPLP0                   | 25        | RPLP0         | 0.223               | RPLP0         | 0.124                                    | 0.045          | RPLP0                    | 0.236                                           | YWHAZ          | 0.463               | 0.297           | 1.399         |
| 7.)                                                                                                        | RNA18S5                 | 27        | RPL22         | 0.249               | RPL22         | 0.155                                    | 0.054          | RPL22                    | 0.260                                           | RPLP0          | 0.379               | 0.165           | 0.999         |
| 8.)                                                                                                        | RPL22                   | 30        | RNA18S5       | 0.346               | RNA18S5       | 0.224                                    | 0.073          | RNA18S5                  | 0.354                                           | EEF1A1         | 0.222               | 0.093           | 0.648         |
| 9.)                                                                                                        | YWHAZ                   | 33        | YWHAZ         | 0.386               | YWHAZ         | 0.255                                    | 0.083          | YWHAZ                    | 0.410                                           | RPL22          | 0.078               | 0.158           | 0.864         |

$C_q$  = quantification cycle; SD = standard deviation; CV = coefficient of variation; r = Pearson's correlation coefficient.

**Supplementary Table 5. Marker genes, primers and amplicons used for characterization of hPDL fibroblasts.**

| Gene symbol     | Gene name (Homo sapiens)                                                 | Accession Number (NCBI GenBank) | Chromosomal location (length) | 5'-forward primer-3' (length / T <sub>m</sub> / %GC / max. ΔG Hairpin & Self-Dimer / Self-Comp. / Self-3'-Comp.) | 5'-reverse primer-3' (length / T <sub>m</sub> / %GC / max. ΔG Hairpin & Self-Dimer / Self-Comp. / Self-3'-Comp.) | Primer Location (max. ΔG Cross-Dimer) | Amplicon (length, %GC, T <sub>m</sub> , SSAT) | Amplicon location (bp of Start/Stop) | Intron-flanking (length) | In silico qPCR specificity | Variants targeted (Transcript /Splice) |
|-----------------|--------------------------------------------------------------------------|---------------------------------|-------------------------------|------------------------------------------------------------------------------------------------------------------|------------------------------------------------------------------------------------------------------------------|---------------------------------------|-----------------------------------------------|--------------------------------------|--------------------------|----------------------------|----------------------------------------|
| VIM             | vimentin                                                                 | NM_003380.3                     | 10p13 (2151bp)                | CTGGATTCACCTCCCTCTGGTTG (22bp / 62.1°C / 54.5% / -1.3 / 5 / 0)                                                   | CGTGATGCTGAGAAGTTTCGTTG (23bp / 60.6°C / 47.8% / -0.6 / 4 / 0)                                                   | exon 8/9 (-2.6)                       | 106bp, 44.3%, 82.3%, no SSAT                  | 1695/1800                            | Yes (850bp)              | Yes (BLAST/UCSC)           | Yes                                    |
| P4HA1           | prolyl 4-hydroxylase, alpha polypeptide I                                | NM_000917.3                     | 10q22.1 (2860bp)              | GCTCTCTGGCTATGAAAATCCTG (23bp / 60.6°C / 47.8% / 0.0 / 2 / 2)                                                    | GTGCAAAGTCAAATGGGGTTC (22bp / 58.4°C / 45.5% / -3.4 / 4 / 0)                                                     | exon 13/14 (-0.9)                     | 146bp, 41.1%, 82.2°C, no SSAT                 | 1396/1541                            | Yes (13371bp)            | Yes (BLAST/UCSC)           | Yes                                    |
| FN1             | fibronectin 1                                                            | NM_212482.1                     | 2q34 (8815bp)                 | GCCAGTCTACAACCAAGTATTCTC (24bp / 62.7°C / 50.0% / -0.3 / 4 / 2)                                                  | GCTTGTTCCTCTGGATTGAAAG (23bp / 60.6°C / 47.8% / -2.5 / 4 / 1)                                                    | exon 45/46 (-3.0)                     | 150bp, 42.7%, 83.1°C, no SSAT                 | 7579/7728                            | Yes (342bp)              | Yes (BLAST/UCSC)           | Yes                                    |
| COL1A2          | collagen, type I, alpha 2                                                | NM_000089.3                     | 7q22.1 (5411bp)               | AGAAACACGCTCTGGCTAGGAG (21bp / 59.8°C / 52.4% / -3.3 / 4 / 2)                                                    | GCATGAAGGCAAGTTGGGTAG (21bp / 59.8°C / 52.4% / -2.3 / 5 / 0)                                                     | exon 50/51 (-0.7)                     | 105bp, 44.8%, 83.3°C, no SSAT                 | 4139/4243                            | Yes (710bp)              | Yes (BLAST/UCSC)           | Yes                                    |
| FMOD            | fibromodulin                                                             | NM_002023.4                     | 1q32 (3271bp)                 | AGTCAACACCAACCTGGAGAAC (22bp / 60.3°C / 50.0% / -1.5 / 3 / 0)                                                    | GAAGTTCACGACGTCCACCAC (21bp / 61.8°C / 57.1% / -6.5 / 6 / 3)                                                     | exon 2/3 (-2.8)                       | 97bp, 51.6%, 85.7°C, no SSAT                  | 1334/1430                            | Yes (4797bp)             | Yes (BLAST/UCSC)           | Yes                                    |
| TNFRSF11B (OPG) | tumor necrosis factor receptor superfamily, member 11b (osteoprotegerin) | NM_002546.3                     | 8q24 (2354bp)                 | TGTCTTTGGTCTCCTGCTAACTC (23bp / 60.6°C / 47.8% / 0.0 / 2 / 0)                                                    | CCTGAAGAATGCCTCCTCACAC (22bp / 62.1°C / 54.5% / -0.9 / 4 / 0)                                                    | exon 3/4 (-1.8)                       | 124bp, 42.7%, 83.1°C, no SSAT                 | 824/947                              | Yes (2019bp)             | Yes (BLAST/UCSC)           | Yes                                    |
| POSTN           | periostin                                                                | NM_006475.2                     | 13q13.3 (3390bp)              | AGACACACCCGTGAGGAAG (19bp / 58.8°C / 57.9% / -1.3 / 4 / 0)                                                       | GGTCAGGTTATTGACTTAGGGTTG (24bp / 61.0°C / 45.8% / -2.6 / 4 / 0)                                                  | exon 23/24 (-3.4)                     | 136bp, 39.4%, 81.9°C, no SSAT                 | 2548/2683                            | Yes (1148bp)             | Yes (BLAST/UCSC)           | Yes                                    |
| RUNX2           | runt related transcription factor 2                                      | NM_001024630.3                  | 6p21 (5553bp)                 | CAGTAGATGGACCTCGGGAAC (21bp / 61.8°C / 57.1% / 0.0 / 3 / 0)                                                      | TGAGGCGGTCAGAGAACAAC (21bp / 59.8°C / 52.4% / -0.9 / 3 / 0)                                                      | exon 5/6 (-3.1)                       | 81bp, 50.6%, 83.7°C, no SSAT                  | 869/949                              | Yes (53889bp)            | Yes (BLAST/UCSC)           | Yes                                    |
| SMAD1           | SMAD family member 1                                                     | NM_005900.2                     | 4q31 (3056bp)                 | AGCAGCACCTACCCTCACTC (20bp / 61.4°C / 60.0% / 0.0 / 3 / 0)                                                       | CTTCAGGAGGCAGGTAAGCAG (21bp / 61.8°C / 57.1% / -0.5 / 3 / 1)                                                     | exon 4/5 (-2.9)                       | 97bp, 60.8%, 90.4°C, no SSAT                  | 1014/1110                            | Yes (2520bp)             | Yes (BLAST/UCSC)           | Yes                                    |
| ALPL            | alkaline phosphatase, liver/bone/kidney                                  | NM_000478.4                     | 1p36.12 (2606bp)              | ACAAGCACTCCCCTTCACTCTG (22bp / 60.3°C / 50.0% / -0.5 / 3 / 2)                                                    | GGTCCGTCACGTTGTTCTCTG (20bp / 61.4°C / 60.0% / -3.3 / 5 / 1)                                                     | exon 7-8/9 (-2.1)                     | 132bp, 56.1%, 89.5°C, no SSAT                 | 1045/1176                            | Yes (3290bp)             | Yes (BLAST/UCSC)           | Yes                                    |
| SCX             | scleraxis bHLH transcription factor                                      | NM_001080514.2                  | 8q24.3 (1027bp)               | CCAGCCCAAACAGATCTGCAC (21bp / 61.8°C / 57.1% / -7.9 / 8 / 2)                                                     | TGCGAATCGCTGCTTTCTGTC (22bp / 60.3°C / 50.0% / -4.2 / 7 / 1)                                                     | exon 1/2 (-3.8)                       | 83bp, 54.2%, 86.6°C, no SSAT                  | 575/657                              | Yes (923bp)              | Yes (BLAST/UCSC)           | Yes                                    |
| S100A4          | S100 calcium binding protein A4                                          | NM_002961.2                     | 1q21 (512bp)                  | TCTCTACAACCTCTCTCCTCAG (23bp / 62.4°C / 52.2% / 0.0 / 3 / 3)                                                     | GGAAGGTGGACACCATCACATC (22bp / 62.1°C / 54.5% / -3.2 / 8 / 1)                                                    | exon 1/3 (-1.5)                       | 108bp, 54.1%, 87.8°C, no SSAT                 | 11/118                               | Yes (943bp)              | Yes (BLAST/UCSC)           | Yes                                    |
| NCAM1           | neural cell adhesion molecule 1 (NCAM1)                                  | NM_000615.6                     | 11q23.1 (5977bp)              | CTCCACCAACCATCATCTGG (21bp / 61.8°C / 57.1% / -1.5 / 3 / 2)                                                      | CAGGATTCTGCCCTCACAGC (20bp / 61.4°C / 60.0% / -1.3 / 6 / 2)                                                      | exon 4/5 (-1.3)                       | 150bp, 49.3%, 86.6°C, no SSAT                 | 799/948                              | Yes (376bp)              | Yes (BLAST/UCSC)           | Yes                                    |

T<sub>m</sub> = melting temperature of primer/specific qPCR product (amplicon); %GC = guanine/cytosine content; bp = base pairs; Comp. = Complementarity; SSAT = secondary structure at annealing temperature.

**Supplementary Figure 1.** Characterization of human PDL fibroblasts. **(a)** Cell morphology of isolated hPDL cells. All cells show a spindle-shaped cell morphology. **(b)** Specific gene expression profile of hPDL markers (western blot of PCR products): untreated control samples of individual patients and of final hPDL cell pool (experimental groups). Abbreviations see Supplementary Table 5.

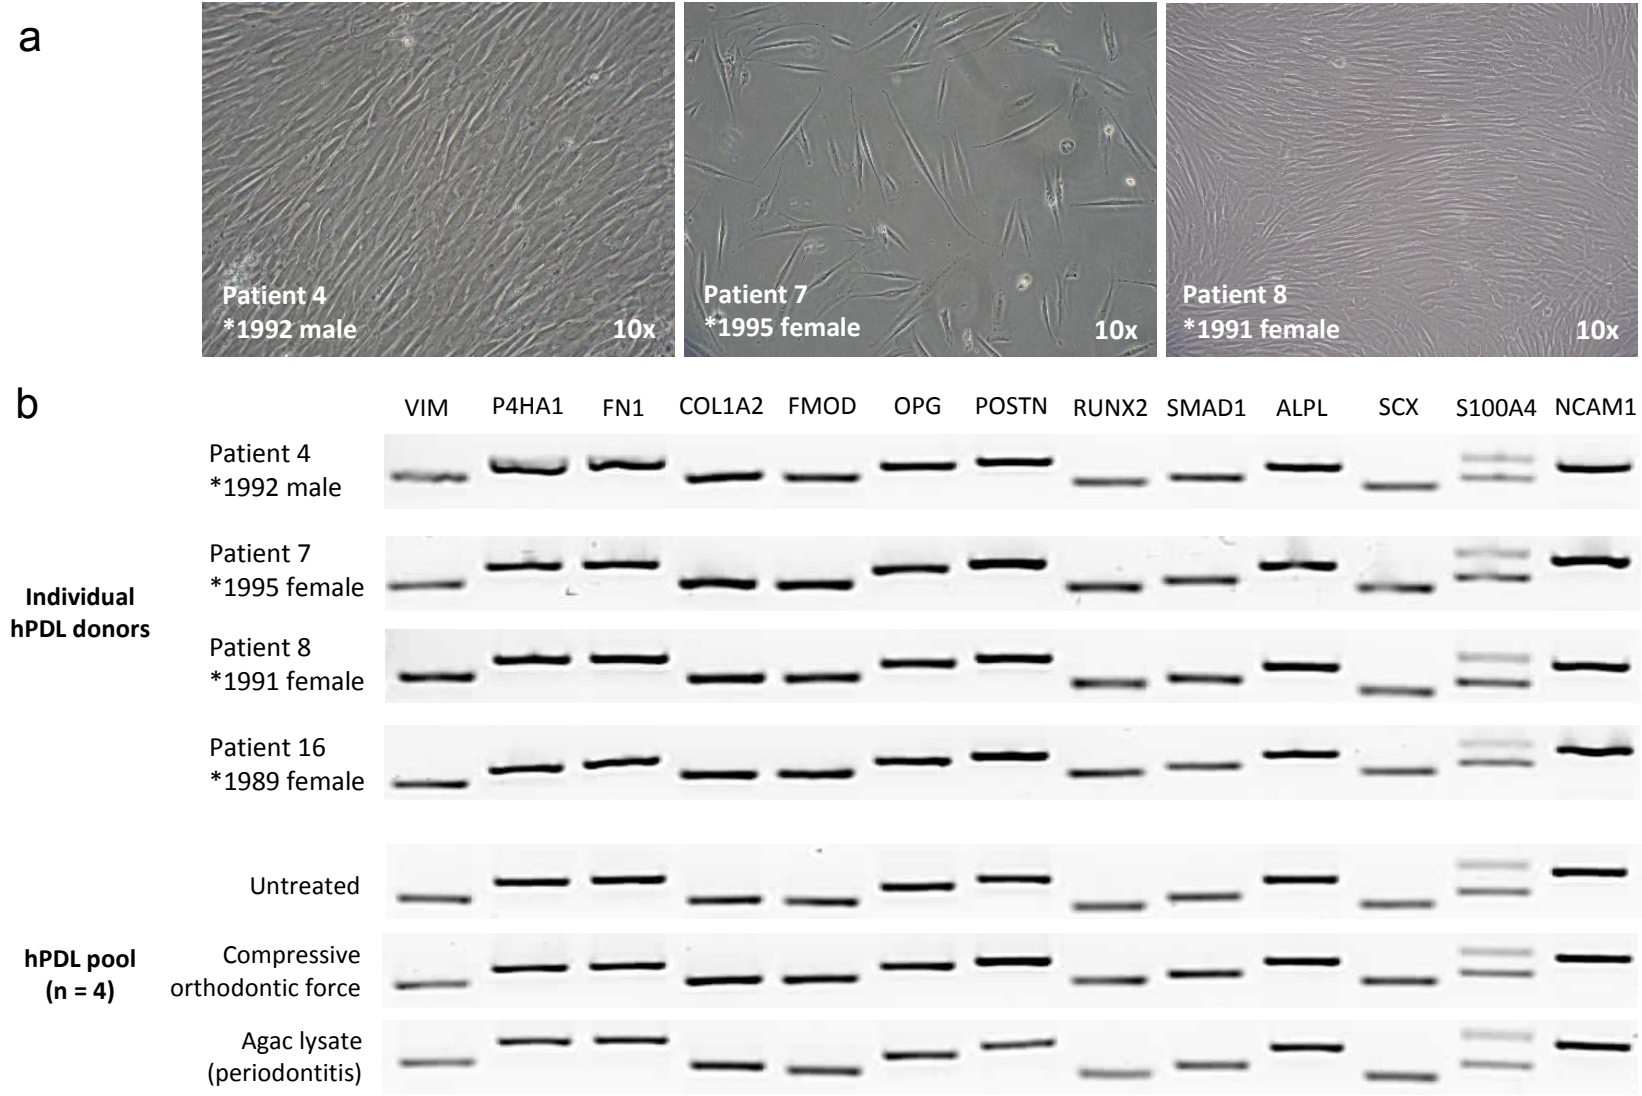

**Supplementary Figure 2.** Uncropped original gel of RT-qPCR products (amplification specificity). For each candidate reference gene / primer pair we found a single fluorescent band at the expected amplicon size. bp = base pairs. Gene names see Table 1. All RT-qPCR products were run concurrently and adjacently on the same gel, which was recorded with the gel documentation system Genoplex 2 (VWR International GmbH, Darmstadt, Germany) and its software GenoCapture (version 7.01, Synoptics Ltd., Cambridge, UK - automatic exposure, exposure time 80 ms, no binning, transillumination) as secure gel data (\*.sgd) and exported as TIF image, which was inverted and cropped to encompass the relevant gel area.

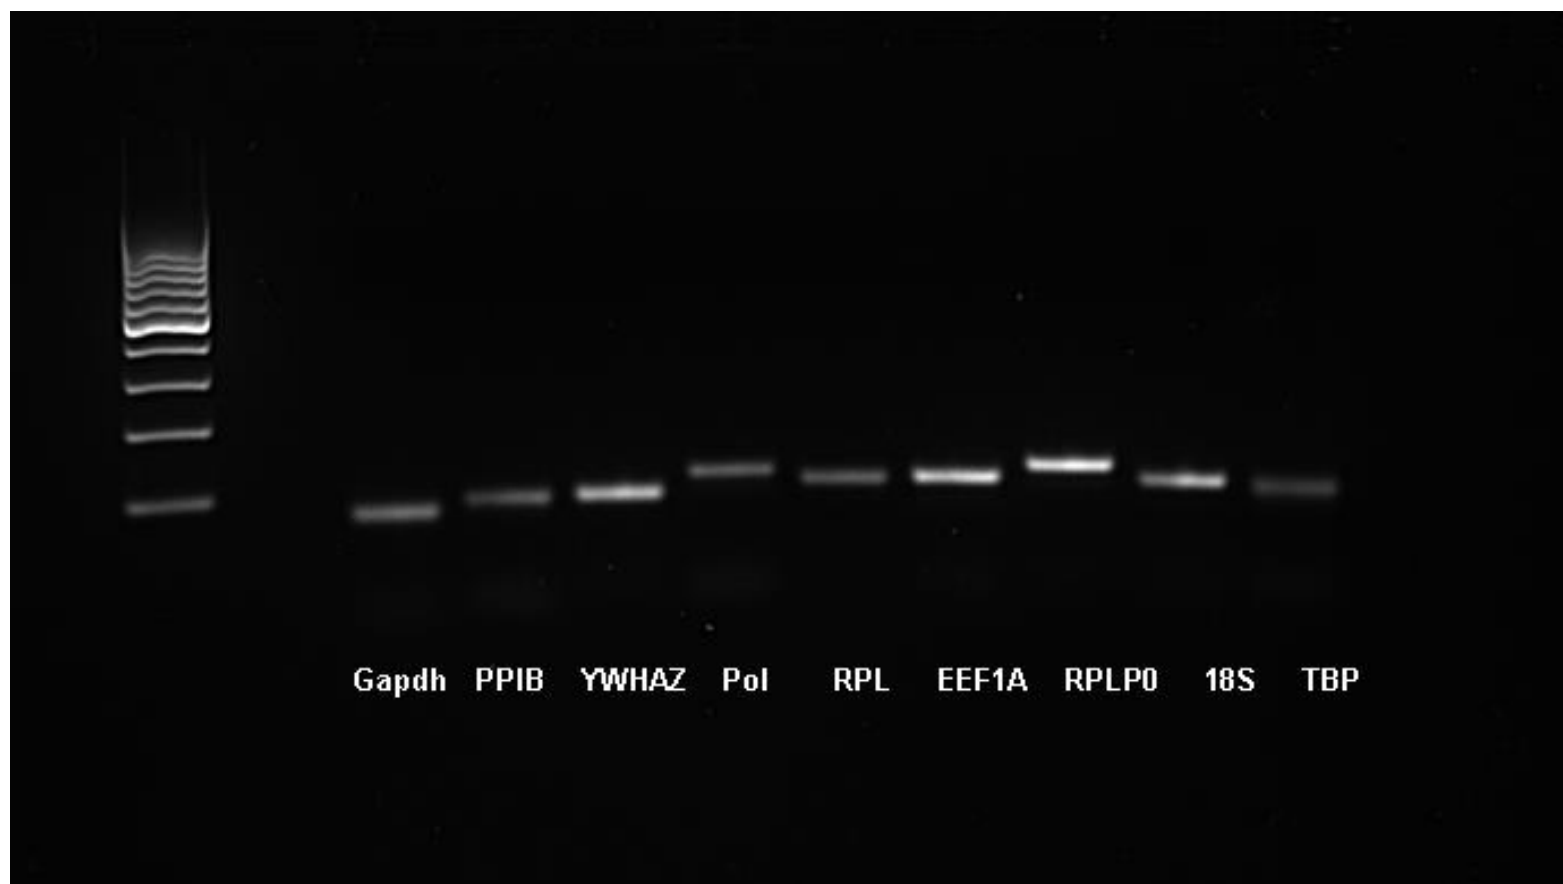

**Supplementary Data 1.** Splice variants and secondary structure analysis of amplicons and primers of the nine evaluated candidate reference genes.

**GAPDH PrimerBLAST** (National Center for Biotechnology Information, Bethesda MD, USA, <https://www.ncbi.nlm.nih.gov/tools/primer-blast> )

| <b>Primer pair 1</b>                                                                                                       |                                                                         |                        |               |              |             |           |            |                             |                                |
|----------------------------------------------------------------------------------------------------------------------------|-------------------------------------------------------------------------|------------------------|---------------|--------------|-------------|-----------|------------|-----------------------------|--------------------------------|
|                                                                                                                            | <b>Sequence (5'→3')</b>                                                 | <b>Template strand</b> | <b>Length</b> | <b>Start</b> | <b>Stop</b> | <b>Tm</b> | <b>GC%</b> | <b>Self complementarity</b> | <b>Self 3' complementarity</b> |
| <b>Forward primer</b>                                                                                                      | TGCCCTCAACGACCACCTTG                                                    | Plus                   | 20            | 1091         | 1110        | 63.28     | 55.00      | 3.00                        | 2.00                           |
| <b>Reverse primer</b>                                                                                                      | CCACCACCCTGTTGCTGTAG                                                    | Minus                  | 20            | 1164         | 1145        | 63.08     | 60.00      | 4.00                        | 2.00                           |
| <b>Product length</b>                                                                                                      | 74                                                                      |                        |               |              |             |           |            |                             |                                |
| <b>Total intron size</b>                                                                                                   | 104 (between pos. 6527996 and 6528101 on <a href="#">NT_009759.17</a> ) |                        |               |              |             |           |            |                             |                                |
| <b>Products on intended target</b>                                                                                         |                                                                         |                        |               |              |             |           |            |                             |                                |
| > <a href="#">NM_002046.5</a> Homo sapiens glyceraldehyde-3-phosphate dehydrogenase (GAPDH), transcript variant 1, mRNA    |                                                                         |                        |               |              |             |           |            |                             |                                |
| product length = 74                                                                                                        |                                                                         |                        |               |              |             |           |            |                             |                                |
| Forward primer                                                                                                             | 1                                                                       | TGCCCTCAACGACCACCTTG   | 20            |              |             |           |            |                             |                                |
| Template                                                                                                                   | 1091                                                                    | .....                  | 1110          |              |             |           |            |                             |                                |
| Reverse primer                                                                                                             | 1                                                                       | CCACCACCCTGTTGCTGTAG   | 20            |              |             |           |            |                             |                                |
| Template                                                                                                                   | 1164                                                                    | .....                  | 1145          |              |             |           |            |                             |                                |
| <b>Products on allowed transcript variants</b>                                                                             |                                                                         |                        |               |              |             |           |            |                             |                                |
| > <a href="#">NM_001289746.1</a> Homo sapiens glyceraldehyde-3-phosphate dehydrogenase (GAPDH), transcript variant 4, mRNA |                                                                         |                        |               |              |             |           |            |                             |                                |
| product length = 74                                                                                                        |                                                                         |                        |               |              |             |           |            |                             |                                |
| Forward primer                                                                                                             | 1                                                                       | TGCCCTCAACGACCACCTTG   | 20            |              |             |           |            |                             |                                |
| Template                                                                                                                   | 1077                                                                    | .....                  | 1096          |              |             |           |            |                             |                                |
| Reverse primer                                                                                                             | 1                                                                       | CCACCACCCTGTTGCTGTAG   | 20            |              |             |           |            |                             |                                |
| Template                                                                                                                   | 1150                                                                    | .....                  | 1131          |              |             |           |            |                             |                                |
| > <a href="#">NM_001289745.1</a> Homo sapiens glyceraldehyde-3-phosphate dehydrogenase (GAPDH), transcript variant 3, mRNA |                                                                         |                        |               |              |             |           |            |                             |                                |
| product length = 74                                                                                                        |                                                                         |                        |               |              |             |           |            |                             |                                |
| Forward primer                                                                                                             | 1                                                                       | TGCCCTCAACGACCACCTTG   | 20            |              |             |           |            |                             |                                |
| Template                                                                                                                   | 1183                                                                    | .....                  | 1202          |              |             |           |            |                             |                                |
| Reverse primer                                                                                                             | 1                                                                       | CCACCACCCTGTTGCTGTAG   | 20            |              |             |           |            |                             |                                |
| Template                                                                                                                   | 1256                                                                    | .....                  | 1237          |              |             |           |            |                             |                                |
| > <a href="#">NM_001256799.2</a> Homo sapiens glyceraldehyde-3-phosphate dehydrogenase (GAPDH), transcript variant 2, mRNA |                                                                         |                        |               |              |             |           |            |                             |                                |
| product length = 74                                                                                                        |                                                                         |                        |               |              |             |           |            |                             |                                |
| Forward primer                                                                                                             | 1                                                                       | TGCCCTCAACGACCACCTTG   | 20            |              |             |           |            |                             |                                |
| Template                                                                                                                   | 1125                                                                    | .....                  | 1144          |              |             |           |            |                             |                                |
| Reverse primer                                                                                                             | 1                                                                       | CCACCACCCTGTTGCTGTAG   | 20            |              |             |           |            |                             |                                |
| Template                                                                                                                   | 1198                                                                    | .....                  | 1179          |              |             |           |            |                             |                                |



**GAPDH** PrimerCheck (SpliceCenter der Genomics and Bioinformatics Group, LMP, CCR, NCI, <http://projects.insilico.us/SpliceCenter/PrimerCheck.jsp> )

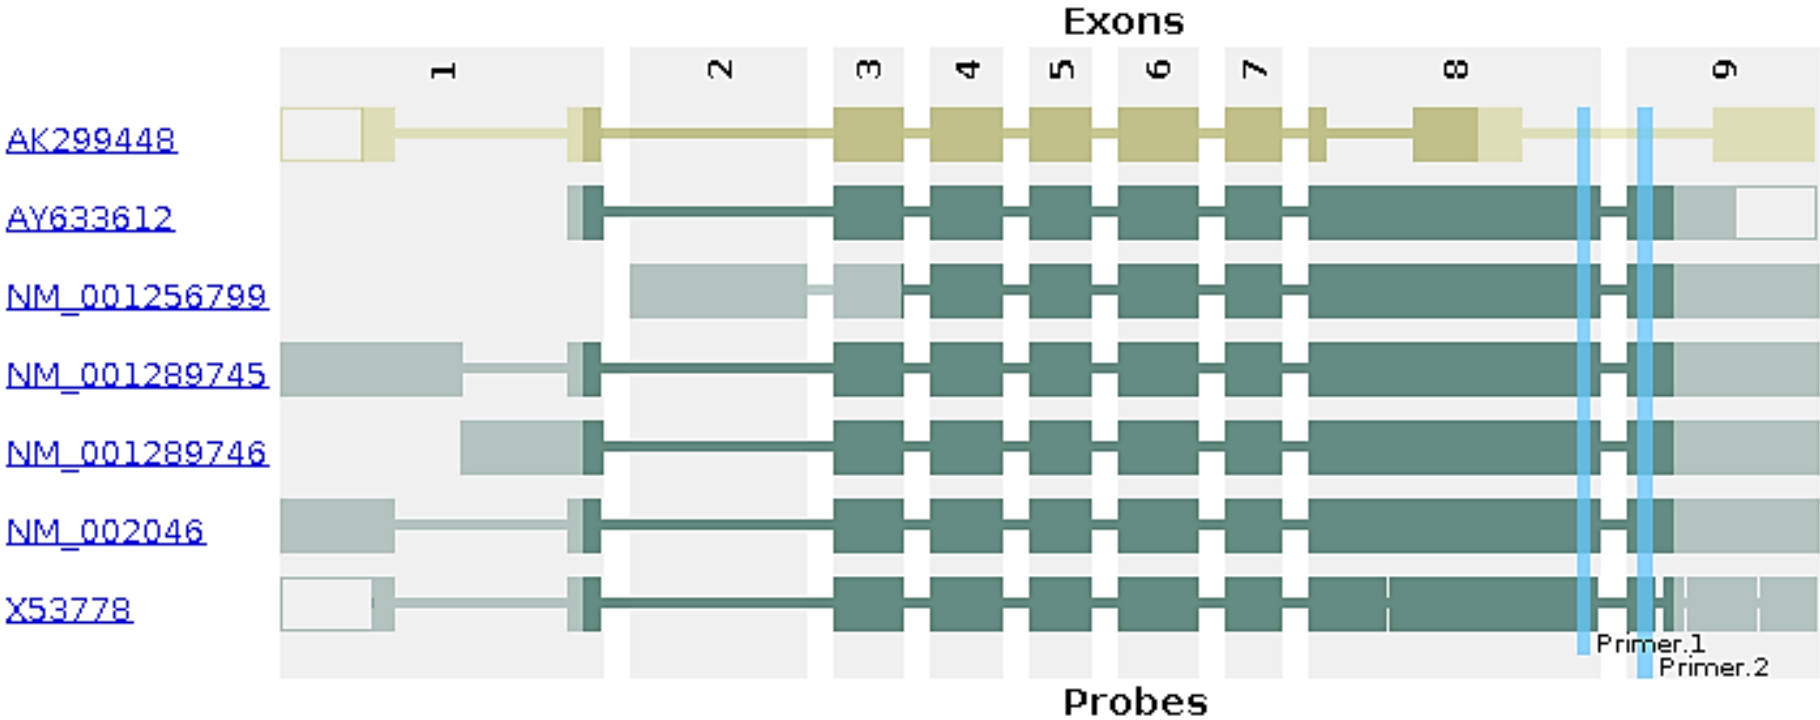

GAPDH

**GAPDH UNAFold** (Integrated DNA Technologies Inc., Coralville, IA, USA, <http://eu.idtdna.com/UNAFold?> , Suboptimality 50%)

*GAPDH Amplicon Sequence*

5' TGCCCTCAACGACCACTTTGTCAAGCTCATTTCCTGGTATGACAACGAATTTGGCTACAGCAACAGGGTGGTGG 3'

## Structures

| Structure Name | Image                                                                               | $\Delta G$ (kcal.mole <sup>-1</sup> ) | T <sub>M</sub> (°C) | $\Delta H$ (kcal.mole <sup>-1</sup> ) | $\Delta S$ (cal.K <sup>-1</sup> mole <sup>-1</sup> ) | Output |
|----------------|-------------------------------------------------------------------------------------|---------------------------------------|---------------------|---------------------------------------|------------------------------------------------------|--------|
| 1              |    | 1.04                                  | 47                  | -25.6                                 | -79.96                                               | Ct Det |
| 2              |    | 1.33                                  | 49.9                | -42.7                                 | -132.17                                              | Ct Det |
| 3              |    | 1.49                                  | 41.3                | -25                                   | -79.51                                               | Ct Det |
| 4              |    | 1.58                                  | 47.1                | -39.2                                 | -122.4                                               | Ct Det |
| 5              |    | 1.66                                  | 41.2                | -27.8                                 | -88.44                                               | Ct Det |
| 6              |   | 1.82                                  | -30.4               | -4.9                                  | -20.19                                               | Ct Det |
| 7              |  | 1.92                                  | -28.6               | -5.3                                  | -21.67                                               | Ct Det |
| 8              |  | 1.98                                  | 34.3                | -23.6                                 | -76.77                                               | Ct Det |



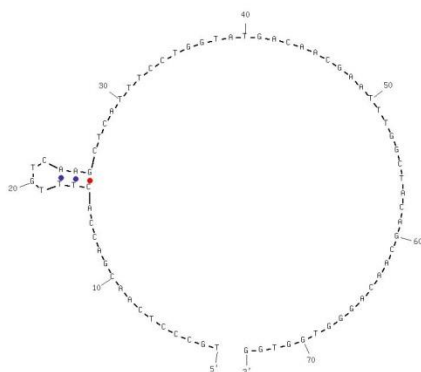

db = 1,978\_jepndu6ef5CSeo6upf1pkaw3vE63566967525342241

**GAPDH UCSC In-silico-PCR Genome Browser** (Dec. 2013 GRCh38/hg38; UCSC Genes; Max. Product Size: 4000; Min. Perfect Match: 15; Min. Good Match: 15; Jim Kent, <http://genome-mirror.genomedk.au.dk/cgi-bin/hgPcr> )

#### UCSC In-Silico PCR

The sequences and coordinates shown below are from UCSC Genes, not from the genome assembly. The links lead to the Genome Browser at the position of the entire target sequence.

```
>uc001qop.3_GAPDH:1091+1164 74bp TGCCCTCAACGACCACCTTTG CCACCACCCCTGTTGCTGTAG  
TGCCCTCAACGACCACCTTTGtcaagctcatttcctggtatgacaacgaat  
ttggCTACAGCAACAGGGTGGTGG
```

```
>uc031qfw.2_GAPDH:1125+1198 74bp TGCCCTCAACGACCACCTTTG CCACCACCCCTGTTGCTGTAG  
TGCCCTCAACGACCACCTTTGtcaagctcatttcctggtatgacaacgaat  
ttggCTACAGCAACAGGGTGGTGG
```

```
>uc031yrl.1_GAPDH:1183+1256 74bp TGCCCTCAACGACCACCTTTG CCACCACCCCTGTTGCTGTAG  
TGCCCTCAACGACCACCTTTGtcaagctcatttcctggtatgacaacgaat  
ttggCTACAGCAACAGGGTGGTGG
```

```
>uc031ym.1_GAPDH:1077+1150 74bp TGCCCTCAACGACCACCTTTG CCACCACCCCTGTTGCTGTAG  
TGCCCTCAACGACCACCTTTGtcaagctcatttcctggtatgacaacgaat  
ttggCTACAGCAACAGGGTGGTGG
```

**Secondary Structures for Sense Primer**

**Dimer:-**

```

5' TGCCCTCAACGACCACTTGG 3'
   ||| | | |||
3' GTTTCACCCAGCAACTCCCGT 5'
                
```

-0.7

**Hairpin:-**

```

/CAGCAACTCCCGT 5'
| : |||
\CACTTGG 3'
                
```

-0.7

**Secondary Structures for Anti-sense Primer**

**Dimer:-**

Not Found

**Hairpin:-**

Not Found

**Cross Dimer**

**Cross Dimer between Sense Primer and Anti-sense Primer:-**

```

5' TGCCCTCAACGACCACTTGG 3'
   | |||| | |
3' GATGTCGTTGTCCACCACC 5'
                
```

-2.4

**PPIB** PrimerBLAST (National Center for Biotechnology Information, Bethesda MD, USA, <https://www.ncbi.nlm.nih.gov/tools/primer-blast> )

| <b>Primer pair 1</b>                                                              |                                                                            |                          |        |       |      |       |       |                      |                         |
|-----------------------------------------------------------------------------------|----------------------------------------------------------------------------|--------------------------|--------|-------|------|-------|-------|----------------------|-------------------------|
|                                                                                   | Sequence (5'->3')                                                          | Template strand          | Length | Start | Stop | Tm    | GC%   | Self complementarity | Self 3' complementarity |
| <b>Forward primer</b>                                                             | TTCCATCGTGTAATCAAGGACTTC                                                   | Plus                     | 24     | 446   | 469  | 61.33 | 41.67 | 4.00                 | 2.00                    |
| <b>Reverse primer</b>                                                             | GCTCACCGTAGATGCTCTTTC                                                      | Minus                    | 21     | 533   | 513  | 61.22 | 52.38 | 4.00                 | 0.00                    |
| <b>Product length</b>                                                             | 88                                                                         |                          |        |       |      |       |       |                      |                         |
| <b>Total intron size</b>                                                          | 3194 (between pos. 40883230 and 40880035 on <a href="#">NT_010194.18</a> ) |                          |        |       |      |       |       |                      |                         |
| <b>Products on intended target</b>                                                |                                                                            |                          |        |       |      |       |       |                      |                         |
| >NM_000942.4 Homo sapiens peptidylprolyl isomerase B (cyclophilin B) (PPIB), mRNA |                                                                            |                          |        |       |      |       |       |                      |                         |
| product length = 88                                                               |                                                                            |                          |        |       |      |       |       |                      |                         |
| Forward primer                                                                    | 1                                                                          | TTCCATCGTGTAATCAAGGACTTC | 24     |       |      |       |       |                      |                         |
| Template                                                                          | 446                                                                        | .....                    | 469    |       |      |       |       |                      |                         |
| Reverse primer                                                                    | 1                                                                          | GCTCACCGTAGATGCTCTTTC    | 21     |       |      |       |       |                      |                         |
| Template                                                                          | 533                                                                        | .....                    | 513    |       |      |       |       |                      |                         |

**PPIB** PrimerCheck (SpliceCenter der Genomics and Bioinformatics Group, LMP, CCR, NCI, <http://projects.insilico.us/SpliceCenter/PrimerCheck.jsp> )

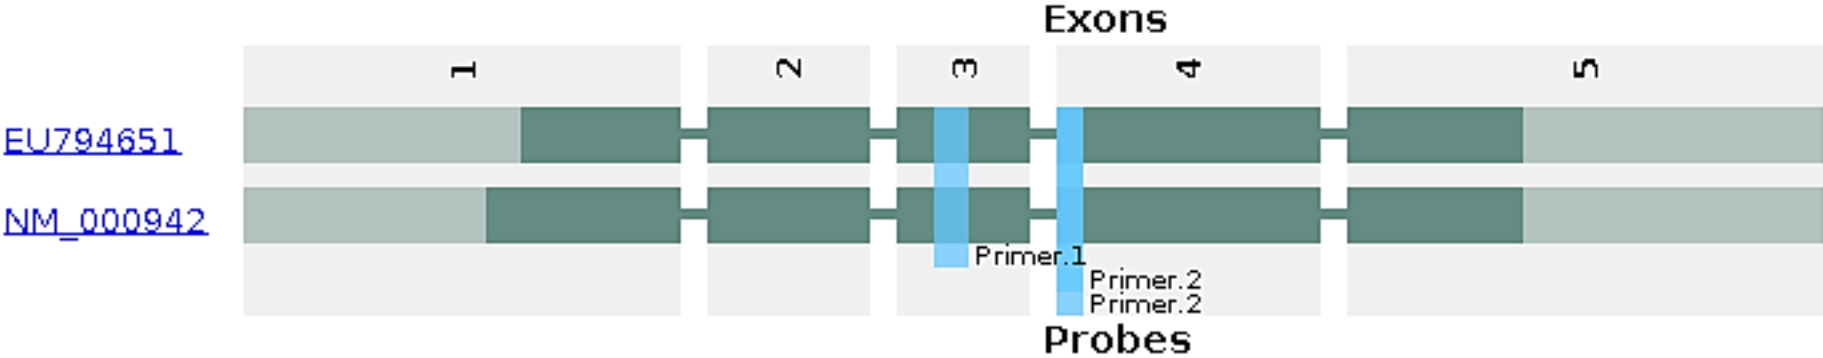

PPIB

**PPIB UCSC In-silico-PCR Genome Browser** (Dec. 2013 GRCh38/hg38; UCSC Genes; Max. Product Size: 4000; Min. Perfect Match: 15; Min. Good Match: 15; Jim Kent, <http://genome-mirror.genomedk.au.dk/cgi-bin/hgPcr> )

### UCSC In-Silico PCR

The sequences and coordinates shown below are from UCSC Genes, not from the genome assembly. The links lead to the Genome Browser at the position of the entire target sequence.

```
>uc002and.3 PPIB:446+533 88bp TTCCATCGTGTAATCAAGGACTTC GTCACCGTAGATGCTCTTTC
TTCCATCGTGTAATCAAGGACTTCatgatccagggcggagacttcaccag
gggagatggcacaggagGAAAGAGCATCTACGGTGAGC
```

**PPIB UNAFold** (Integrated DNA Technologies Inc., Coralville, IA, USA, <http://eu.idtdna.com/UNAFold?> , Suboptimality 50%)

*PPIB Amplicon Sequence* 5' TTCCATCGTGTAATCAAGGACTTCATGATCCAGGGCGGAGACTTCACCAGGGGAGATGGCACAGGAGGAAAGAGCATCTACGGTGAGC 3'

### Structures

| Structure Name | Image                                                                               | $\Delta G$ (kcal.mole <sup>-1</sup> ) | T <sub>M</sub> (°C) | $\Delta H$ (kcal.mole <sup>-1</sup> ) | $\Delta S$ (cal.K <sup>-1</sup> mole <sup>-1</sup> ) | Output |
|----------------|-------------------------------------------------------------------------------------|---------------------------------------|---------------------|---------------------------------------|------------------------------------------------------|--------|
| 1              |  | 0.45                                  | 49                  | -13.1                                 | -40.66                                               | Ct Det |
| 2              |  | 0.64                                  | 47.3                | -16.1                                 | -50.24                                               | Ct Det |
| 3              |  | 0.66                                  | 41.5                | -11.2                                 | -35.6                                                | Ct Det |
| 4              |  | 1.25                                  | 49                  | -36.6                                 | -113.63                                              | Ct Det |
| 5              |  | 1.32                                  | 35.1                | -16.4                                 | -53.2                                                | Ct Det |

Output of boxplot\_mg (C)  
Info:util 4.2  
Created Thu May 7 06:30:29 2015  
Output of s1r\_graph (C)  
Info:util 4.2

Created Thu May 7 06:30:29 2015  
Output of s1r\_graph (C)  
Info:util 4.2

Created Thu May 7 06:30:29 2015  
Output of s1r\_graph (C)  
Info:util 4.2

Created Thu May 7 06:30:29 2015

Energy Dotplot for /tmp/anaFold/05yowvjasmejeika02hecwfaE635665950283600020/

deltaG in Plot File = 0.9 kcal/mol

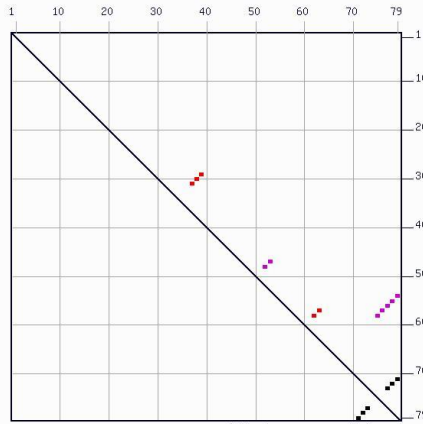

Lower Triangle Shows  
Optimal Energy  
Upper Triangle  
Base pairs Plotted: 15

Optimal energy: 0.4  
0.4 < energy <= 0.6  
0.6 < energy <= 0.8  
0.8 < energy <= 1.1  
1.1 < energy <= 1.3

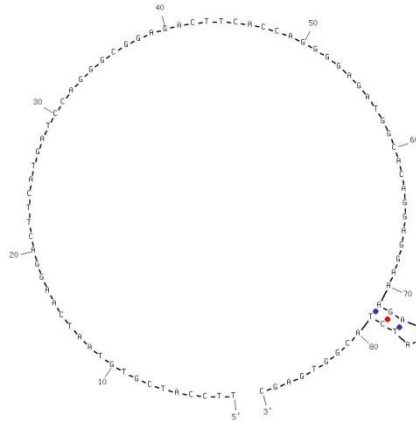

dG = 0.448 05yowvjasmejeika02hecwfaE635665950283600020

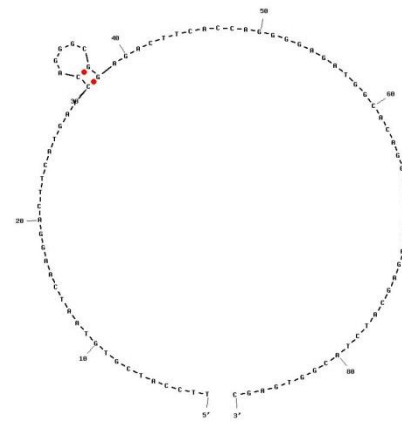

dG = 0.636 05yowvjasmejeika02hecwfaE635665950283600020

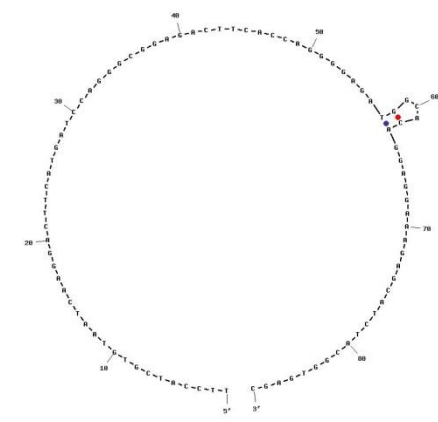

dG = 0.66 05yowvjasmejeika02hecwfaE635665950283600020

Output of s1r\_graph (C)  
Info:util 4.2

Created Thu May 7 06:30:29 2015  
Output of s1r\_graph (C)  
Info:util 4.2

Created Thu May 7 06:30:29 2015

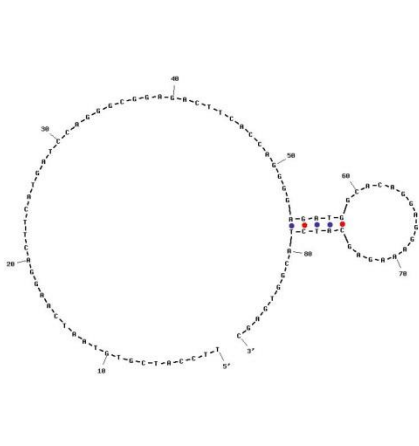

dG = 1.256 05yowvjasmejeika02hecwfaE635665950283600020

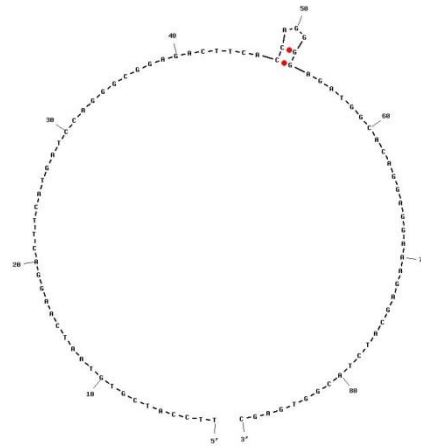

dG = 1.325 05yowvjasmejeika02hecwfaE635665950283600020



|                                                                                                                                                                                                                                                                                                                                          |                                                                                                                                                                                                                                                                                                                                                                                                                                                                                                                                                                                                           |  |
|------------------------------------------------------------------------------------------------------------------------------------------------------------------------------------------------------------------------------------------------------------------------------------------------------------------------------------------|-----------------------------------------------------------------------------------------------------------------------------------------------------------------------------------------------------------------------------------------------------------------------------------------------------------------------------------------------------------------------------------------------------------------------------------------------------------------------------------------------------------------------------------------------------------------------------------------------------------|--|
| <p><b>Secondary Structures for Sense Primer</b></p> <p><b>Dimer:-</b></p> <pre> 5' TTCCATCGTGAATCAAGGACTTC 3'                  3' CTCAGGAACAAATGTGCTACCTT 5' </pre> <p style="text-align: right;">-1.3</p> <pre> 5' TTCCATCGTGAATCAAGGACTTC 3'               3' CTCAGGAACAAATGTGCTACCTT 5' </pre> <p style="text-align: right;">-0.5</p> |                                                                                                                                                                                                                                                                                                                                                                                                                                                                                                                                                                                                           |  |
| <p><b>Hairpin:-</b></p> <pre> /GTGCTACCTT 5' T         \AATCAAGGACTTC 3' </pre> <p style="text-align: right;">-1.3</p>                                                                                                                                                                                                                   | <p><b>Cross Dimer</b></p> <p><b>Cross Dimer between Sense Primer and Anti-sense Primer:-</b></p> <pre> 5' TTCCATCGTGAATCAAGGACTTC 3'         3' CTTTCTCGTAGATGCCACTCG 5' </pre> <p style="text-align: right;">-2.1</p> <pre> 5' TTCCATCGTGAATCAAGGACTTC 3'             3' CTTTCTCGTAGATGCCACTCG 5' </pre> <p style="text-align: right;">-1.3</p> <pre> 5' TTCCATCGTGAATCAAGGACTTC 3'                3' CTTTCTCGTAGATGCCACTCG 5' </pre> <p style="text-align: right;">-0.5</p> <pre> 5' TTCCATCGTGAATCAAGGACTTC 3'               3' CTTTCTCGTAGATGCCACTCG 5' </pre> <p style="text-align: right;">-0.4</p> |  |
| <p><b>Secondary Structures for Anti-sense Primer</b></p> <p><b>Dimer:-</b></p> <pre> 5' GCTCACCGTAGATGCTCTTTC 3'               3' CTTTCTCGTAGATGCCACTCG 5' </pre> <p style="text-align: right;">-0.7</p>                                                                                                                                 |                                                                                                                                                                                                                                                                                                                                                                                                                                                                                                                                                                                                           |  |
| <p><b>Hairpin:-</b></p> <pre> /TAGATGCCACTCG 5' G       \CTCTTC 3' </pre> <p style="text-align: right;">-0.7</p>                                                                                                                                                                                                                         |                                                                                                                                                                                                                                                                                                                                                                                                                                                                                                                                                                                                           |  |

**YWHAZ PrimerBLAST** (National Center for Biotechnology Information, Bethesda MD, USA, <https://www.ncbi.nlm.nih.gov/tools/primer-blast> )

**Primer pair 1**

|                          | Sequence (5'->3')                                                         | Template strand | Length | Start | Stop | Tm    | GC%   | Self complementarity | Self 3' complementarity |
|--------------------------|---------------------------------------------------------------------------|-----------------|--------|-------|------|-------|-------|----------------------|-------------------------|
| <b>Forward primer</b>    | AGGAGATTACTACCGTTACTTGGC                                                  | Plus            | 24     | 504   | 527  | 62.43 | 45.83 | 4.00                 | 2.00                    |
| <b>Reverse primer</b>    | AGCTTCTGGTATGCTTGTGTG                                                     | Minus           | 23     | 594   | 572  | 62.24 | 43.48 | 4.00                 | 0.00                    |
| <b>Product length</b>    | 91                                                                        |                 |        |       |      |       |       |                      |                         |
| <b>Total intron size</b> | 617 (between pos. 15210694 and 15210076 on <a href="#">NT_008046.17</a> ) |                 |        |       |      |       |       |                      |                         |

**Products on intended target**

>[NM\\_003406.3](#) Homo sapiens tyrosine 3-monooxygenase/tryptophan 5-monooxygenase activation protein, zeta (YWHAZ), transcript variant 1, mRNA

product length = 91

Forward primer 1 AGGAGATTACTACCGTTACTTGGC 24  
 Template 504 ..... 527

Reverse primer 1 AGCTTCTGGTATGCTTGTGTG 23  
 Template 594 ..... 572

**Products on allowed transcript variants**

>[XM\\_011517289.1](#) PREDICTED: Homo sapiens tyrosine 3-monooxygenase/tryptophan 5-monooxygenase activation protein, zeta (YWHAZ), transcript variant X4, mRNA

product length = 91

Forward primer 1 AGGAGATTACTACCGTTACTTGGC 24  
 Template 809 ..... 832

Reverse primer 1 AGCTTCTGGTATGCTTGTGTG 23  
 Template 899 ..... 877

>[XM\\_005251063.2](#) PREDICTED: Homo sapiens tyrosine 3-monooxygenase/tryptophan 5-monooxygenase activation protein, zeta (YWHAZ), transcript variant X3, mRNA

product length = 91

Forward primer 1 AGGAGATTACTACCGTTACTTGGC 24  
 Template 663 ..... 686

Reverse primer 1 AGCTTCTGGTATGCTTGTGTG 23  
 Template 753 ..... 731

>[XM\\_005251062.2](#) PREDICTED: Homo sapiens tyrosine 3-monooxygenase/tryptophan 5-monooxygenase activation protein, zeta (YWHAZ), transcript variant X2, mRNA

product length = 91

Forward primer 1 AGGAGATTACTACCGTTACTTGGC 24  
 Template 676 ..... 699

Reverse primer 1 AGCTTCTGGTATGCTTGTGTG 23  
 Template 766 ..... 744

>XM\_005251061.2 PREDICTED: Homo sapiens tyrosine 3-monooxygenase/tryptophan 5-monooxygenase activation protein, zeta (YWHAZ), transcript variant X1, mRNA

product length = 91  
Forward primer 1 AGGAGATTACTACCGTTACTTGGC 24  
Template 901 ..... 924  
  
Reverse primer 1 AGCTTCTTGGTATGCTTGTGTG 23  
Template 991 ..... 969

>NM\_001135702.1 Homo sapiens tyrosine 3-monooxygenase/tryptophan 5-monooxygenase activation protein, zeta (YWHAZ), transcript variant 6, mRNA

product length = 91  
Forward primer 1 AGGAGATTACTACCGTTACTTGGC 24  
Template 543 ..... 566  
  
Reverse primer 1 AGCTTCTTGGTATGCTTGTGTG 23  
Template 633 ..... 611

>NM\_001135701.1 Homo sapiens tyrosine 3-monooxygenase/tryptophan 5-monooxygenase activation protein, zeta (YWHAZ), transcript variant 5, mRNA

product length = 91  
Forward primer 1 AGGAGATTACTACCGTTACTTGGC 24  
Template 524 ..... 547  
  
Reverse primer 1 AGCTTCTTGGTATGCTTGTGTG 23  
Template 614 ..... 592

>NM\_001135700.1 Homo sapiens tyrosine 3-monooxygenase/tryptophan 5-monooxygenase activation protein, zeta (YWHAZ), transcript variant 4, mRNA

product length = 91  
Forward primer 1 AGGAGATTACTACCGTTACTTGGC 24  
Template 475 ..... 498  
  
Reverse primer 1 AGCTTCTTGGTATGCTTGTGTG 23  
Template 565 ..... 543

>NM\_001135699.1 Homo sapiens tyrosine 3-monooxygenase/tryptophan 5-monooxygenase activation protein, zeta (YWHAZ), transcript variant 3, mRNA

product length = 91  
Forward primer 1 AGGAGATTACTACCGTTACTTGGC 24  
Template 521 ..... 544  
  
Reverse primer 1 AGCTTCTTGGTATGCTTGTGTG 23  
Template 611 ..... 589

>NM\_145690.2 Homo sapiens tyrosine 3-monooxygenase/tryptophan 5-monooxygenase activation protein, zeta (YWHAZ), transcript variant 2, mRNA

product length = 91  
Forward primer 1 AGGAGATTACTACCGTTACTTGGC 24  
Template 578 ..... 601  
  
Reverse primer 1 AGCTTCTTGGTATGCTTGTGTG 23  
Template 668 ..... 646

YWHAZ PrimerCheck (SpliceCenter der Genomics and Bioinformatics Group, LMP, CCR, NCI, <http://projects.insilico.us/SpliceCenter/PrimerCheck.jsp> )

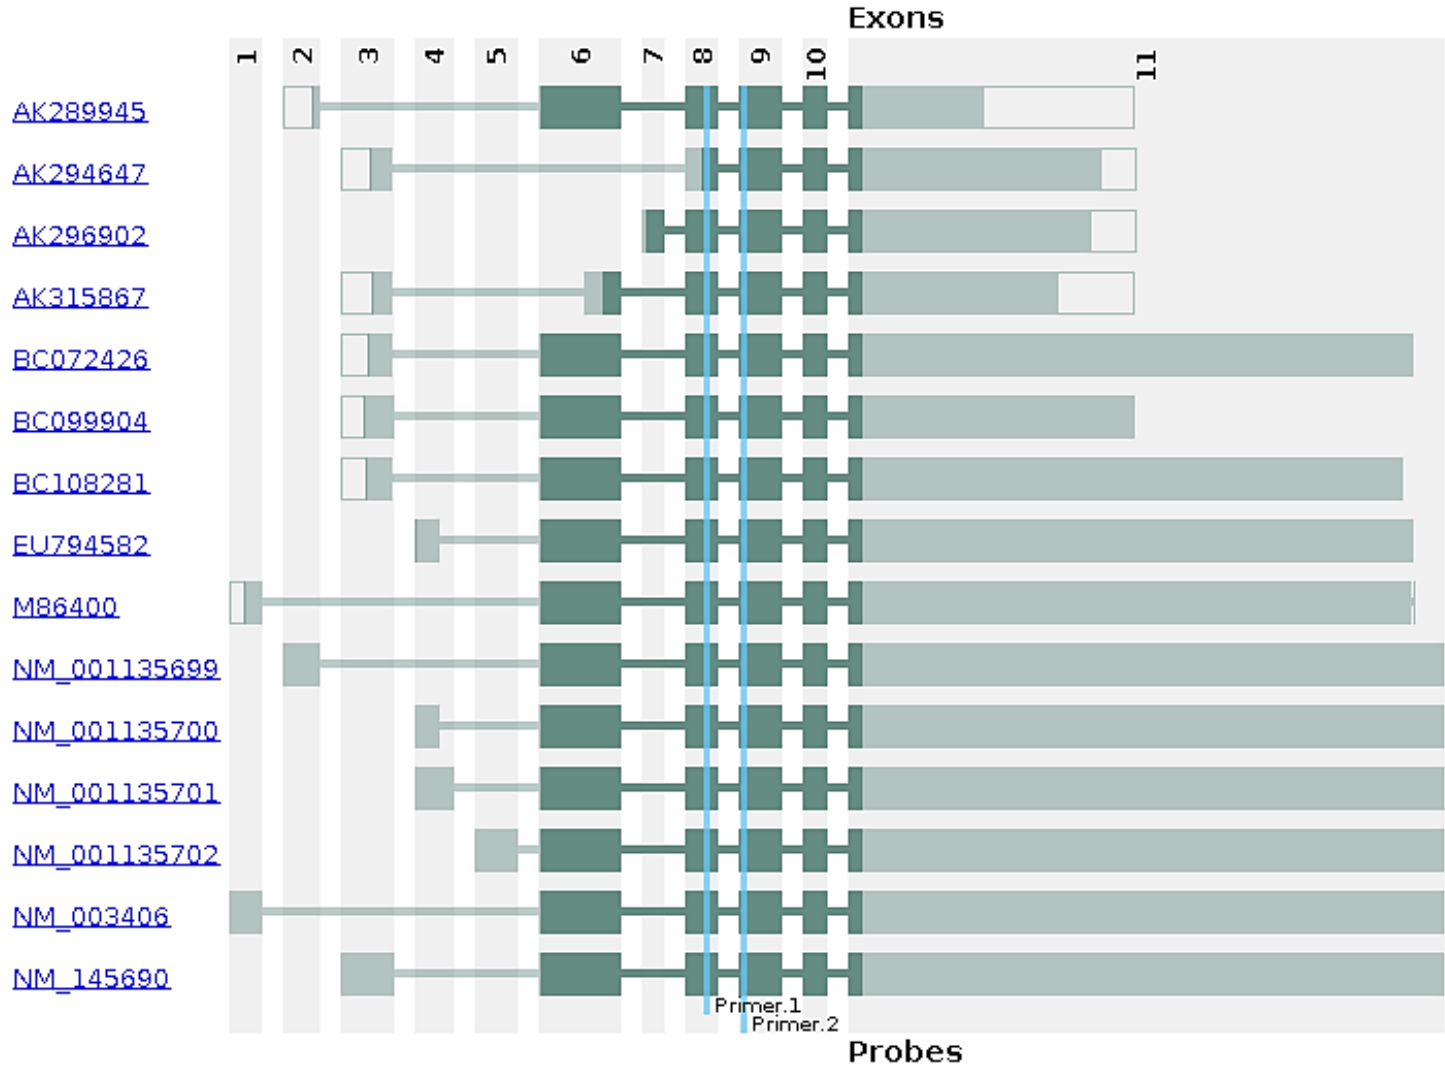

YWHAZ

**YWHAZ** UCSC In-silico-PCR Genome Browser (Dec. 2013 GRCh38/hg38; UCSC Genes; Max. Product Size: 4000; Min. Perfect Match: 15; Min. Good Match: 15; Jim Kent, <http://genome-mirror.genomedk.au.dk/cgi-bin/hgPcr> )

## UCSC In-Silico PCR

The sequences and coordinates shown below are from UCSC Genes, not from the genome assembly. The links lead to the Genome Browser at the position of the entire target sequence.

```
>uc0111he.1 YWHAZ:543+633 91bp AGGAGATTACTACCGTTACTTGGC AGCTTCTTGGTATGCTTGTGTG  
AGGAGATTACTACCGTTACTTGGCtgaggttgccgctggtgatgacaaga  
aagggattgtcgatcagtCACAAACAAGCATAACCAAGAAGCT
```

```
>uc0111hf.1 YWHAZ:524+614 91bp AGGAGATTACTACCGTTACTTGGC AGCTTCTTGGTATGCTTGTGTG  
AGGAGATTACTACCGTTACTTGGCtgaggttgccgctggtgatgacaaga  
aagggattgtcgatcagtCACAAACAAGCATAACCAAGAAGCT
```

```
>uc0111hg.1 YWHAZ:273+363 91bp AGGAGATTACTACCGTTACTTGGC AGCTTCTTGGTATGCTTGTGTG  
AGGAGATTACTACCGTTACTTGGCtgaggttgccgctggtgatgacaaga  
aagggattgtcgatcagtCACAAACAAGCATAACCAAGAAGCT
```

```
>uc003yjb.2 YWHAZ:475+565 91bp AGGAGATTACTACCGTTACTTGGC AGCTTCTTGGTATGCTTGTGTG  
AGGAGATTACTACCGTTACTTGGCtgaggttgccgctggtgatgacaaga  
aagggattgtcgatcagtCACAAACAAGCATAACCAAGAAGCT
```

```
>uc010mbq.2 YWHAZ:410+500 91bp AGGAGATTACTACCGTTACTTGGC AGCTTCTTGGTATGCTTGTGTG  
AGGAGATTACTACCGTTACTTGGCtgaggttgccgctggtgatgacaaga  
aagggattgtcgatcagtCACAAACAAGCATAACCAAGAAGCT
```

```
>uc003yjc.2 YWHAZ:578+668 91bp AGGAGATTACTACCGTTACTTGGC AGCTTCTTGGTATGCTTGTGTG  
AGGAGATTACTACCGTTACTTGGCtgaggttgccgctggtgatgacaaga  
aagggattgtcgatcagtCACAAACAAGCATAACCAAGAAGCT
```

```
>uc010mbr.2 YWHAZ:521+611 91bp AGGAGATTACTACCGTTACTTGGC AGCTTCTTGGTATGCTTGTGTG  
AGGAGATTACTACCGTTACTTGGCtgaggttgccgctggtgatgacaaga  
aagggattgtcgatcagtCACAAACAAGCATAACCAAGAAGCT
```

```
>uc003yjd.2 YWHAZ:504+594 91bp AGGAGATTACTACCGTTACTTGGC AGCTTCTTGGTATGCTTGTGTG  
AGGAGATTACTACCGTTACTTGGCtgaggttgccgctggtgatgacaaga  
aagggattgtcgatcagtCACAAACAAGCATAACCAAGAAGCT
```

**YWHAZ** UNAFold (Integrated DNA Technologies Inc., Coralville, IA, USA, <http://eu.idtdna.com/UNAFold?> , Suboptimality 50%)

*YWHAZ Amplicon Sequence*

5' AGGAGATTACTACCGTTACTTGGCTGAGGTTGCCGCTGGTGATGACAAGAAAGGGATTGTCGATCAGTCACAACAAGCATACCAAGAAGCT 3'

## Structures

| Structure Name | Image                                                                               | $\Delta G$ (kcal.mole <sup>-1</sup> ) | T <sub>M</sub> (°C) | $\Delta H$ (kcal.mole <sup>-1</sup> ) | $\Delta S$ (cal.K <sup>-1</sup> mole <sup>-1</sup> ) | Output |
|----------------|-------------------------------------------------------------------------------------|---------------------------------------|---------------------|---------------------------------------|------------------------------------------------------|--------|
| 1              |    | 0.98                                  | 32.5                | -10.9                                 | -35.66                                               | Ct Det |
| 2              |    | 1.03                                  | 41.9                | -18                                   | -57.14                                               | Ct Det |
| 3              |    | 1.06                                  | 46.6                | -25.3                                 | -79.13                                               | Ct Det |
| 4              |    | 1.3                                   | 41.4                | -22                                   | -69.94                                               | Ct Det |
| 5              |    | 1.47                                  | 35.7                | -18.6                                 | -60.23                                               | Ct Det |
| 6              |   | 1.52                                  | 26                  | -13.4                                 | -44.79                                               | Ct Det |
| 7              |  | 1.57                                  | 39                  | -23.3                                 | -74.64                                               | Ct Det |
| 8              |  | 1.74                                  | 41.1                | -28.9                                 | -91.96                                               | Ct Det |
| 9              |  | 1.88                                  | 18.8                | -13.3                                 | -45.56                                               | Ct Det |

Output of boxplot\_ng (C) Created Tue May 5 11:25:05 2015 Output of sir\_graph (C) #F03U411 4,2

Created Tue May 5 11:25:04 2015 Output of sir\_graph (C) #F03U411 4,2

Created Tue May 5 11:25:04 2015 Output of sir\_graph (C) #F03U411 4,2

Created Tue May 5 11:25:04 2015

Energy Dotplot For /tmp/unaFold/uvekxi512w20h40ucusygbukE635664417035961837/

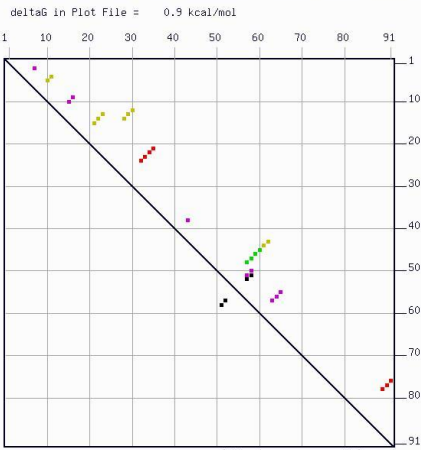

Optimal energy: 0.9  
 Lower Triangle Shows 0.9 < energy <= 1.1  
 Optimal Energy 1.1 < energy <= 1.4  
 Upper Triangle 1.4 < energy <= 1.6  
 Base pairs Plotted: 32 1.6 < energy <= 1.8

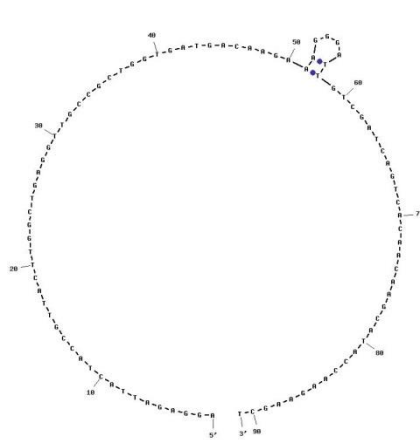

deltaG = 0.982 uvekxi512w20h40ucusygbukE635664417035961837

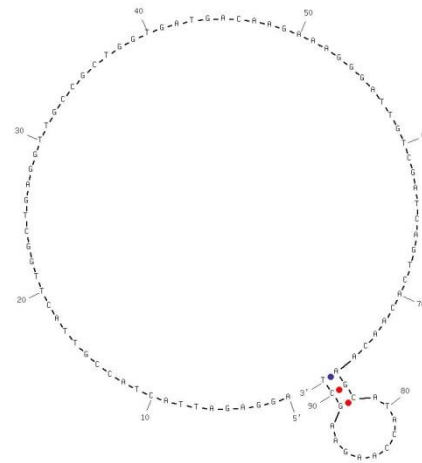

deltaG = 1.035 uvekxi512w20h40ucusygbukE635664417035961837

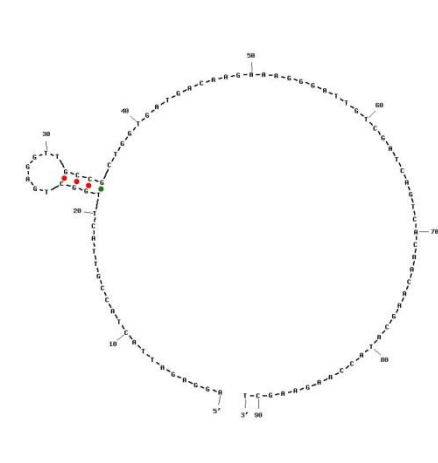

deltaG = 1.061 uvekxi512w20h40ucusygbukE635664417035961837

Output of sir\_graph (C) #F03U411 4,2

Created Tue May 5 11:25:04 2015 Output of sir\_graph (C) #F03U411 4,2

Created Tue May 5 11:25:04 2015 Output of sir\_graph (C) #F03U411 4,2

Created Tue May 5 11:25:04 2015 Output of sir\_graph (C) #F03U411 4,2

Created Tue May 5 11:25:04 2015

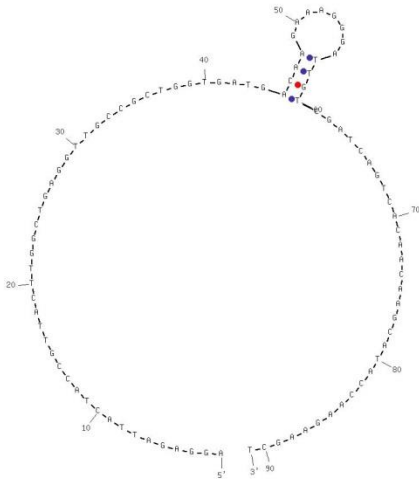

deltaG = 1.3 uvekxi512w20h40ucusygbukE635664417035961837

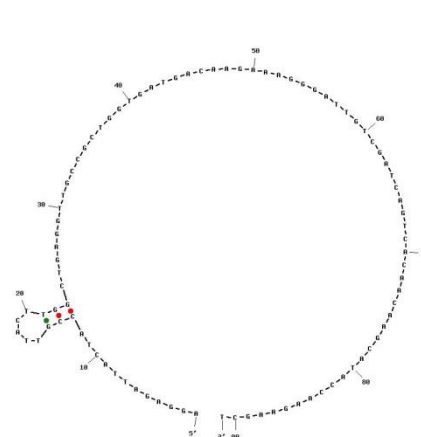

deltaG = 1.466 uvekxi512w20h40ucusygbukE635664417035961837

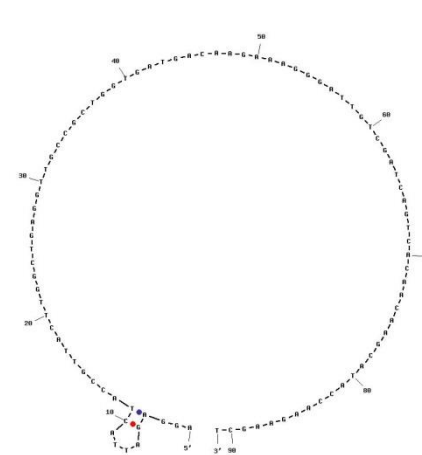

deltaG = 1.522 uvekxi512w20h40ucusygbukE635664417035961837

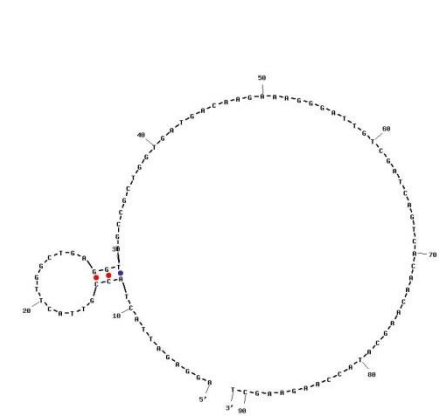

deltaG = 1.568 uvekxi512w20h40ucusygbukE635664417035961837

Output of sip\_graph (C)  
#P03Lut11\_4.2

Created Tue May 5 11:05:05 2005  
Output of sip\_graph (C)  
#P03Lut11\_4.2

Created Tue May 5 11:05:05 2005

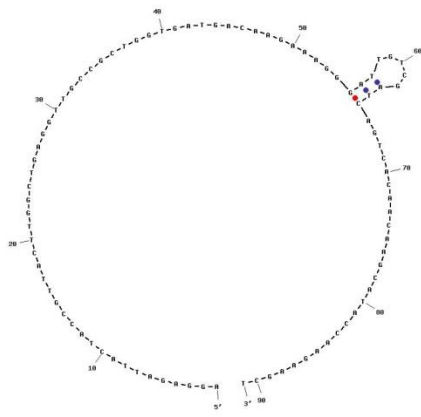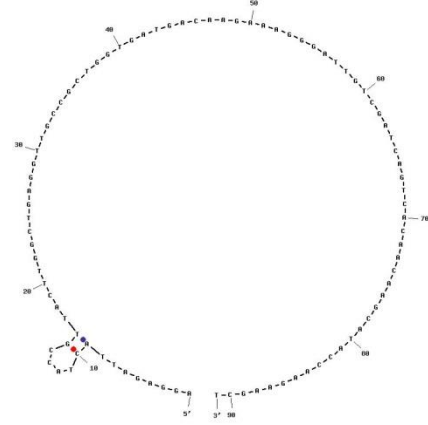

dg = 1, 737 uvexkx1512u20i40ucusghukdE635664417035961837

dg = 1, 879 uvexkx1512u20i40ucusghukdE635664417035961837



```

Secondary Structures for Sense Primer

Dimer:-

    Not Found

Hairpin:-

    Not Found

Secondary Structures for Anti-sense Primer

Dimer:-

          5' AGCTTCTTGGTATGCTTGTGTG 3'
          ||||
3' GTGTGTTTCGTAIGGTTCTTCGA 5'
-3.0

          5' AGCTTCTTGGTATGCTTGTGTG 3'
          ||| | | |
3' GTGTGTTTCGTAIGGTTCTTCGA 5'
-1.8

Hairpin:-

/TTCTTCGA 5'
| | |||
\GGTATGCTTGTGTG 3'
-1.8

Cross Dimer

Cross Dimer between Sense Primer and Anti-sense Primer:-

          5' AGGAGATTACTACCGTTACTTGGC 3'
          | | | ||| |
3' GTGTGTTTCGTAIGGTTCTTCGA 5'
-2.2

          5' AGGAGATTACTACCGTTACTTGGC 3'
          |||
3' GTGTGTTTCGTAIGGTTCTTCGA 5'
-0.7

          5' AGGAGATTACTACCGTTACTTGGC 3'
          | | | ||| |
3' GTGTGTTTCGTAIGGTTCTTCGA 5'
-0.3

          5' AGGAGATTACTACCGTTACTTGGC 3'
          | | | ||| |
3' GTGTGTTTCGTAIGGTTCTTCGA 5'
-0.3
    
```

**POLR2A PrimerBLAST** (National Center for Biotechnology Information, Bethesda MD, USA, <https://www.ncbi.nlm.nih.gov/tools/primer-blast> )

| <b>Primer pair 1</b>                                                                                               |                                                                         |                        |        |       |      |       |       |                      |                         |
|--------------------------------------------------------------------------------------------------------------------|-------------------------------------------------------------------------|------------------------|--------|-------|------|-------|-------|----------------------|-------------------------|
|                                                                                                                    | Sequence (5'->3')                                                       | Template strand        | Length | Start | Stop | Tm    | GC%   | Self complementarity | Self 3' complementarity |
| <b>Forward primer</b>                                                                                              | TCGCTTACTGTCTTCCTGTTGG                                                  | Plus                   | 22     | 3798  | 3819 | 62.77 | 50.00 | 3.00                 | 0.00                    |
| <b>Reverse primer</b>                                                                                              | TGTGTTGGCAGTCACCTTCC                                                    | Minus                  | 20     | 3905  | 3886 | 62.95 | 55.00 | 3.00                 | 3.00                    |
| <b>Product length</b>                                                                                              | 108                                                                     |                        |        |       |      |       |       |                      |                         |
| <b>Total intron size</b>                                                                                           | 468 (between pos. 7019488 and 7019957 on <a href="#">NT_010718.17</a> ) |                        |        |       |      |       |       |                      |                         |
| <b>Products on intended target</b>                                                                                 |                                                                         |                        |        |       |      |       |       |                      |                         |
| > <a href="#">NM_000937.4</a> Homo sapiens polymerase (RNA) II (DNA directed) polypeptide A, 220kDa (POLR2A), mRNA |                                                                         |                        |        |       |      |       |       |                      |                         |
| product length = 108                                                                                               |                                                                         |                        |        |       |      |       |       |                      |                         |
| Forward primer                                                                                                     | 1                                                                       | TCGCTTACTGTCTTCCTGTTGG | 22     |       |      |       |       |                      |                         |
| Template                                                                                                           | 3798                                                                    | .....                  | 3819   |       |      |       |       |                      |                         |
| Reverse primer                                                                                                     | 1                                                                       | TGTGTTGGCAGTCACCTTCC   | 20     |       |      |       |       |                      |                         |
| Template                                                                                                           | 3905                                                                    | .....                  | 3886   |       |      |       |       |                      |                         |

**POLR2A PrimerCheck** (SpliceCenter der Genomics and Bioinformatics Group, LMP, CCR, NCI, <http://projects.insilico.us/SpliceCenter/PrimerCheck.jsp>)

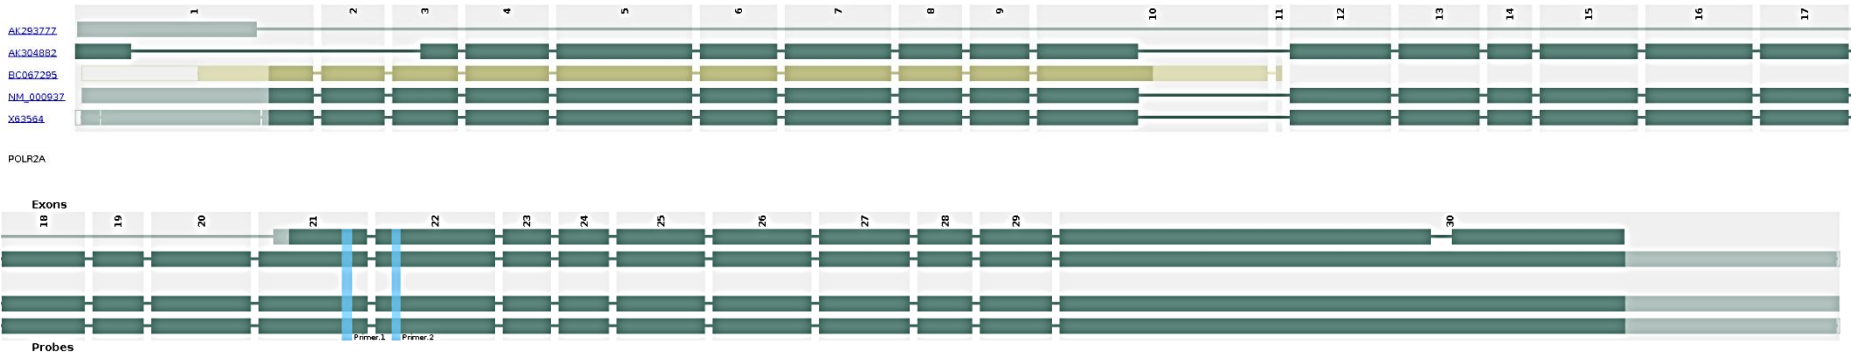

**POLR2A UCSC In-silico-PCR Genome Browser** (Dec. 2013 GRCh38/hg38; UCSC Genes; Max. Product Size: 4000; Min. Perfect Match: 15; Min. Good Match: 15; Jim Kent, <http://genome-mirror.genomedk.au.dk/cgi-bin/hgPcr> )

### UCSC In-Silico PCR

The sequences and coordinates shown below are from UCSC Genes, not from the genome assembly. The links lead to the Genome Browser at the position of the entire target sequence.

```
>uc032eso.1 POLR2A:3798+3905 108bp TCGCTTACTGTCTTCCTGTTGG TGTGTTGGCAGTCACCTTCC
TCGCTTACTGTCTTCCTGTTGGgccagtcgcgctcgagatgctgagagagc
caaggatattctgtgccgtctggagcatacaacgttgaGGAAGGTGACTG
CCAACACA
```

**POLR2A UNAFold** (Integrated DNA Technologies Inc., Coralville, IA, USA, <http://eu.idtdna.com/UNAFold?> , Suboptimality 50%)

*POLR2A Amplicon Sequence*

5' TCGCTTACTGTCTTCCTGTTGGCCAGTCCGCTCGAGATGCTGAGAGAGCCAAGGATATTCTGTGCCGTCTGGAGCATACAACGTTGAGGAAGGTGACTGCCAACACA 3'

### Structures

| Structure Name | Image                                                                               | $\Delta G$ (kcal.mole <sup>-1</sup> ) | T <sub>M</sub> (°C) | $\Delta H$ (kcal.mole <sup>-1</sup> ) | $\Delta S$ (cal.K <sup>-1</sup> mole <sup>-1</sup> ) | Output                                                               |
|----------------|-------------------------------------------------------------------------------------|---------------------------------------|---------------------|---------------------------------------|------------------------------------------------------|----------------------------------------------------------------------|
| 1              |  | 0.11                                  | 58.7                | -28                                   | -84.38                                               | <input type="button" value="Ct"/> <input type="button" value="Det"/> |
| 2              |  | 0.63                                  | 48.7                | -18.1                                 | -56.23                                               | <input type="button" value="Ct"/> <input type="button" value="Det"/> |
| 3              |  | 0.64                                  | 50.7                | -22.2                                 | -68.55                                               | <input type="button" value="Ct"/> <input type="button" value="Det"/> |
| 4              |  | 0.83                                  | 49.9                | -26.6                                 | -82.35                                               | <input type="button" value="Ct"/> <input type="button" value="Det"/> |

Output of boxplot\_mg (C) Created Wed May 6 12:59:15 2015 Output of sir\_graph (C)  
fFoldUtil 4.2 WWSLutil 4.2

Created Wed May 6 12:59:14 2015 Output of sir\_graph (C)  
WWSLutil 4.2

Created Wed May 6 12:59:14 2015 Output of sir\_graph (C)  
WWSLutil 4.2

Created Wed May 6 12:59:15 2015

Energy Dotplot for /tmp/unafold/lpiufr3jjjshfb1qwe1xsiroE635665319550488703/

deltaG in Plot File = 0.7 kcal/mol

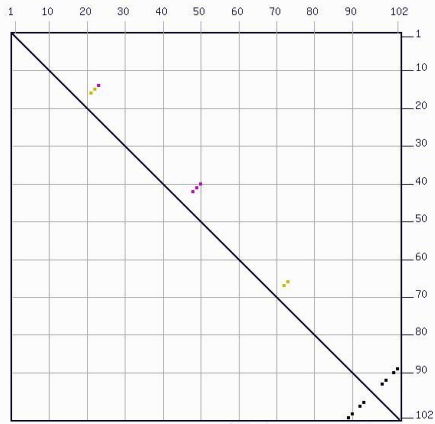

Lower Triangle Shows Optimal energy: 0.1  
Optimal Energy 0.1 < energy <= 0.3  
Upper Triangle 0.3 < energy <= 0.5  
Base pairs Plotted: 12 0.5 < energy <= 0.6  
0.6 < energy <= 0.8

Output of sir\_graph (C) Created Wed May 6 12:59:15 2015  
WWSLutil 4.2

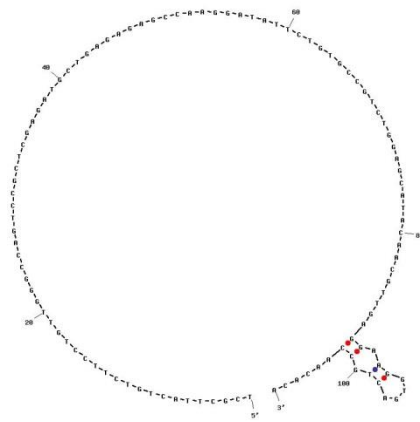

$\Delta G = 0.112$  lpiufr3jjjshfb1qwe1xsiroE635665319550488703

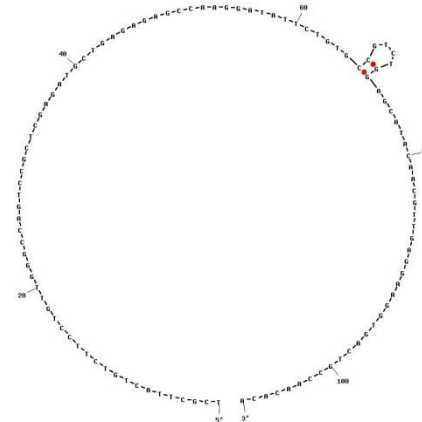

$\Delta G = 0.634$  lpiufr3jjjshfb1qwe1xsiroE635665319550488703

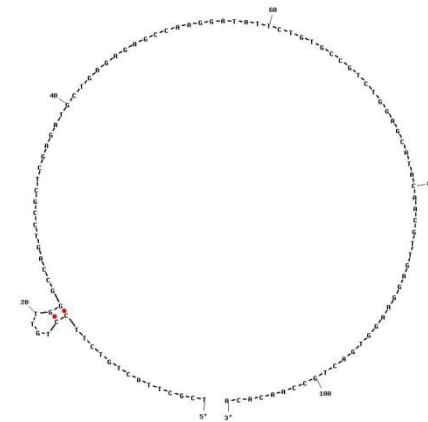

$\Delta G = 0.637$  lpiufr3jjjshfb1qwe1xsiroE635665319550488703

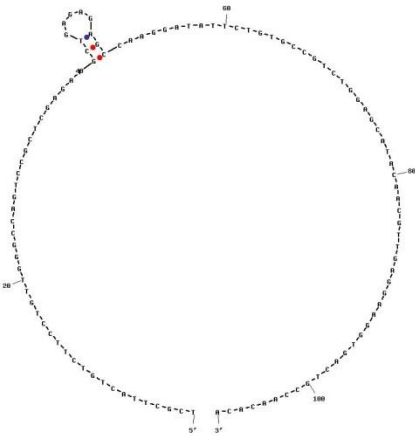

$\Delta G = 0.836$  lpiufr3jjjshfb1qwe1xsiroE635665319550488703

**Secondary Structures for Sense Primer**

**Dimer:-**

Not Found

**Hairpin:-**

Not Found

**Secondary Structures for Anti-sense Primer**

**Dimer:-**

```

5' TGTGTTGGCAGTCACCTTC 3'
   |||  ||  |||
3' CCTTCCACTGACGGTTGTGT 5'
```

-1.3

**Hairpin:-**

```

/GGTTGTGT 5'
|   |||
\CAGTCACCTTC 3'
```

-1.3

**Cross Dimer**

**Cross Dimer between Sense Primer and Anti-sense Primer:-**

```

5' TCGCTTACTGTCTTCCTGTTGG 3'
   || ||||| ||
3' CCTTCCACTGACGGTTGTGT 5'
```

-2.5

```

5' TCGCTTACTGTCTTCCTGTTGG 3'
   |   |||
3' CCTTCCACTGACGGTTGTGT 5'
```

-1.1

**TBP PrimerBLAST** (National Center for Biotechnology Information, Bethesda MD, USA, <https://www.ncbi.nlm.nih.gov/tools/primer-blast>)

| <b>Primer pair 1</b>                                                                                  |                                                                              |                        |        |       |      |       |       |                      |                         |  |
|-------------------------------------------------------------------------------------------------------|------------------------------------------------------------------------------|------------------------|--------|-------|------|-------|-------|----------------------|-------------------------|--|
|                                                                                                       | Sequence (5'->3')                                                            | Template strand        | Length | Start | Stop | Tm    | GC%   | Self complementarity | Self 3' complementarity |  |
| Forward primer                                                                                        | CGGCTGTTTAACTTCGCTTCC                                                        | Plus                   | 21     | 79    | 99   | 62.54 | 52.38 | 5.00                 | 0.00                    |  |
| Reverse primer                                                                                        | TGGGTTATCTTCACACGCCAAG                                                       | Minus                  | 22     | 164   | 143  | 63.37 | 50.00 | 3.00                 | 2.00                    |  |
| Product length                                                                                        | 86                                                                           |                        |        |       |      |       |       |                      |                         |  |
| Total intron size                                                                                     | 2418 (between pos. 110324529 and 110326948 on <a href="#">NT_025741.16</a> ) |                        |        |       |      |       |       |                      |                         |  |
| <b>Products on intended target</b>                                                                    |                                                                              |                        |        |       |      |       |       |                      |                         |  |
| > <a href="#">NM_003194.4</a> Homo sapiens TATA box binding protein (TBP), transcript variant 1, mRNA |                                                                              |                        |        |       |      |       |       |                      |                         |  |
| product length = 86                                                                                   |                                                                              |                        |        |       |      |       |       |                      |                         |  |
| Forward primer                                                                                        | 1                                                                            | CGGCTGTTTAACTTCGCTTCC  | 21     |       |      |       |       |                      |                         |  |
| Template                                                                                              | 79                                                                           | .....                  | 99     |       |      |       |       |                      |                         |  |
| Reverse primer                                                                                        | 1                                                                            | TGGGTTATCTTCACACGCCAAG | 22     |       |      |       |       |                      |                         |  |
| Template                                                                                              | 164                                                                          | .....                  | 143    |       |      |       |       |                      |                         |  |

**TBP UCSC In-silico-PCR Genome Browser** (Dec. 2013 GRCh38/hg38; UCSC Genes; Max. Product Size: 4000; Min. Perfect Match: 15; Min. Good Match: 15; Jim Kent, <http://genome-mirror.genomedk.au.dk/cgi-bin/hgPcr> )

**UCSC In-Silico PCR**

The sequences and coordinates shown below are from UCSC Genes, not from the genome assembly. The links lead to the Genome Browser at the position of the entire target sequence.

```
>uc003qxu.3 TBP:79+164 86bp CGGCTGTTTAACTTCGCTTCC TGGGTTATCTTCACACGCCAAG
CGGCTGTTTAACTTCGCTTCCgctggcccatagtgatctttgcagtgacc
cagcatcactgtttCTTGGCGTGTGAAGATAACCCA
```

```
>uc003qxt.3 TBP:79+167 89bp CGGCTGTTTAACTTCGCTTCC TGGGTTATCTTCACACGCCAAG
CGGCTGTTTAACTTCGCTTCCgctggcccatagtgatctttgcagtgacc
cagcagcatcactgtttCTTGGCGTGTGAAGATAACCCA
```

TBP PrimerCheck (SpliceCenter der Genomics and Bioinformatics Group, LMP, CCR, NCI, <http://projects.insilico.us/SpliceCenter/PrimerCheck.jsp> )

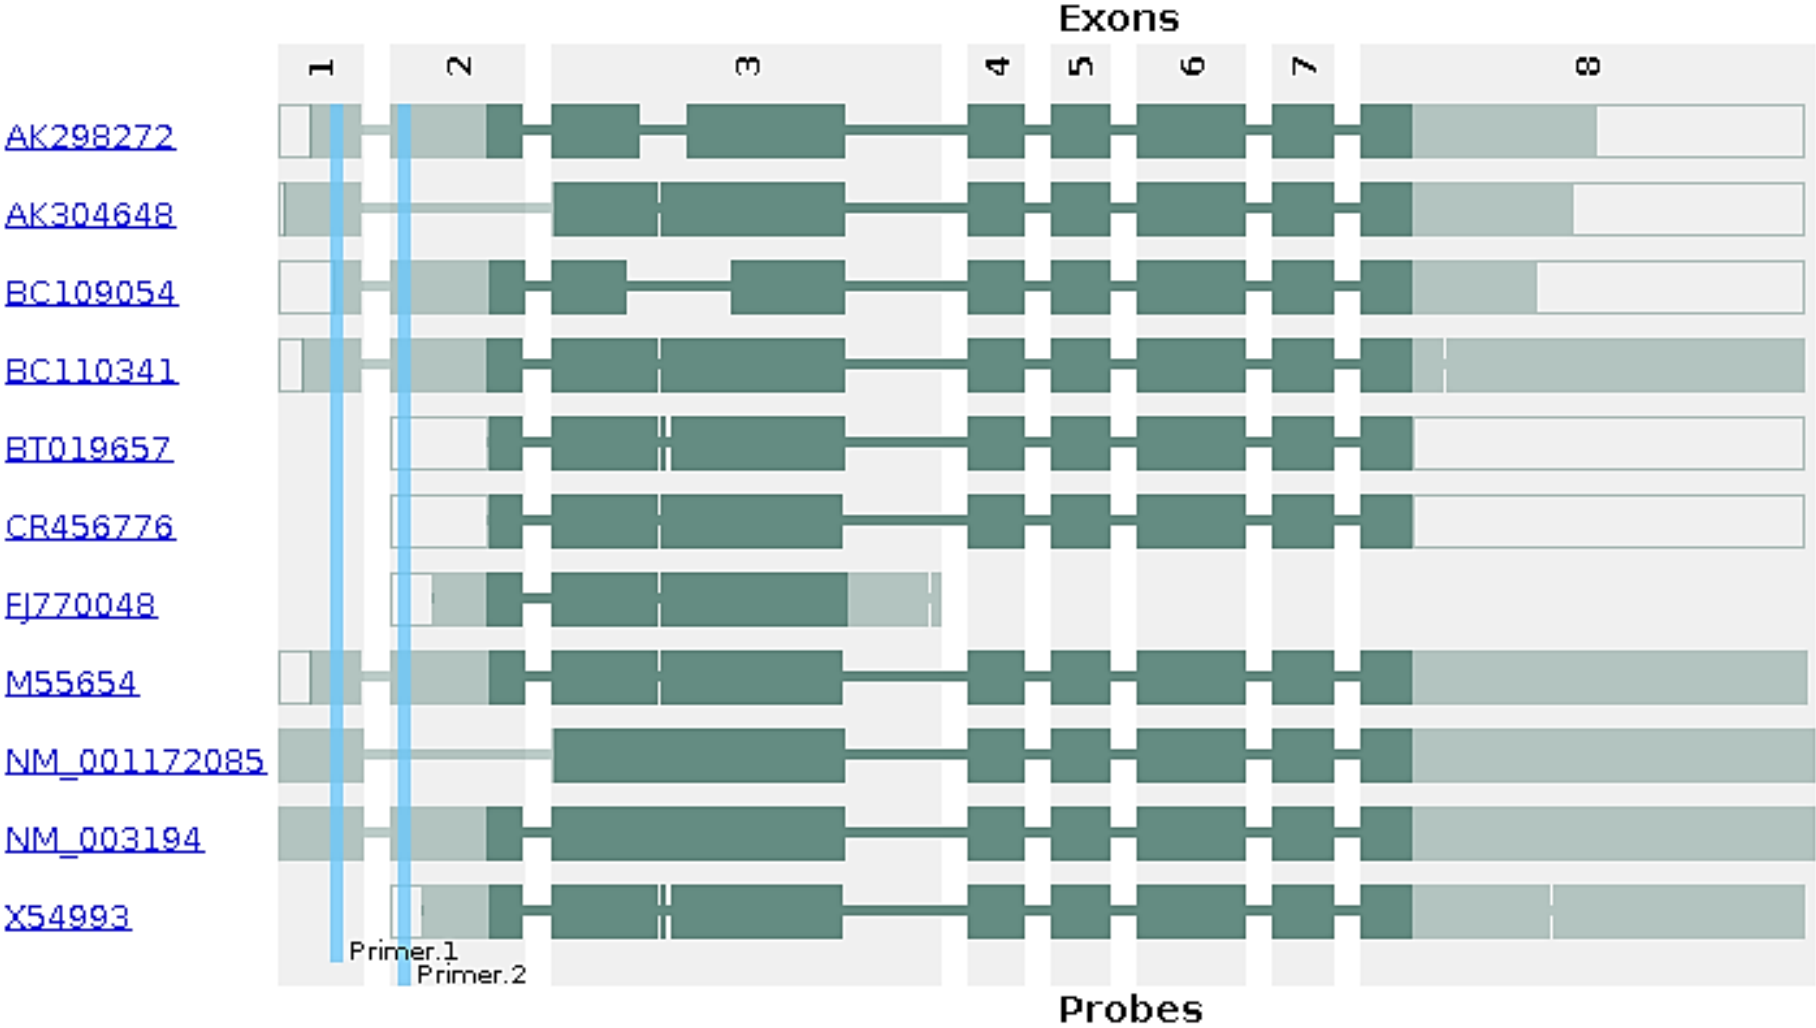

TBP

**TBP UNAFold** (Integrated DNA Technologies Inc., Coralville, IA, USA, <http://eu.idtdna.com/UNAFold?> , Suboptimality 50%)

*TBP Amplicon Sequence*

5' CGGCTGTTTAACTTCGCTTCCGCTGGCCCATAGTGATCTTTCAGTGACCCAGCATCACTGTTTCTTGCGTGTGAAGATAACCCA 3'

## Structures

| Structure Name | Image                                                                             | $\Delta G$ (kcal.mole <sup>-1</sup> ) | T <sub>M</sub> (°C) | $\Delta H$ (kcal.mole <sup>-1</sup> ) | $\Delta S$ (cal.K <sup>-1</sup> mole <sup>-1</sup> ) | Output                                                               |
|----------------|-----------------------------------------------------------------------------------|---------------------------------------|---------------------|---------------------------------------|------------------------------------------------------|----------------------------------------------------------------------|
| 1              |  | 0.26                                  | 58.1                | -46.1                                 | -139.16                                              | <input type="button" value="Ct"/> <input type="button" value="Det"/> |
| 2              |  | 0.89                                  | 53.2                | -42.5                                 | -130.23                                              | <input type="button" value="Ct"/> <input type="button" value="Det"/> |
| 3              |  | 1.15                                  | 44.4                | -23.5                                 | -74                                                  | <input type="button" value="Ct"/> <input type="button" value="Det"/> |

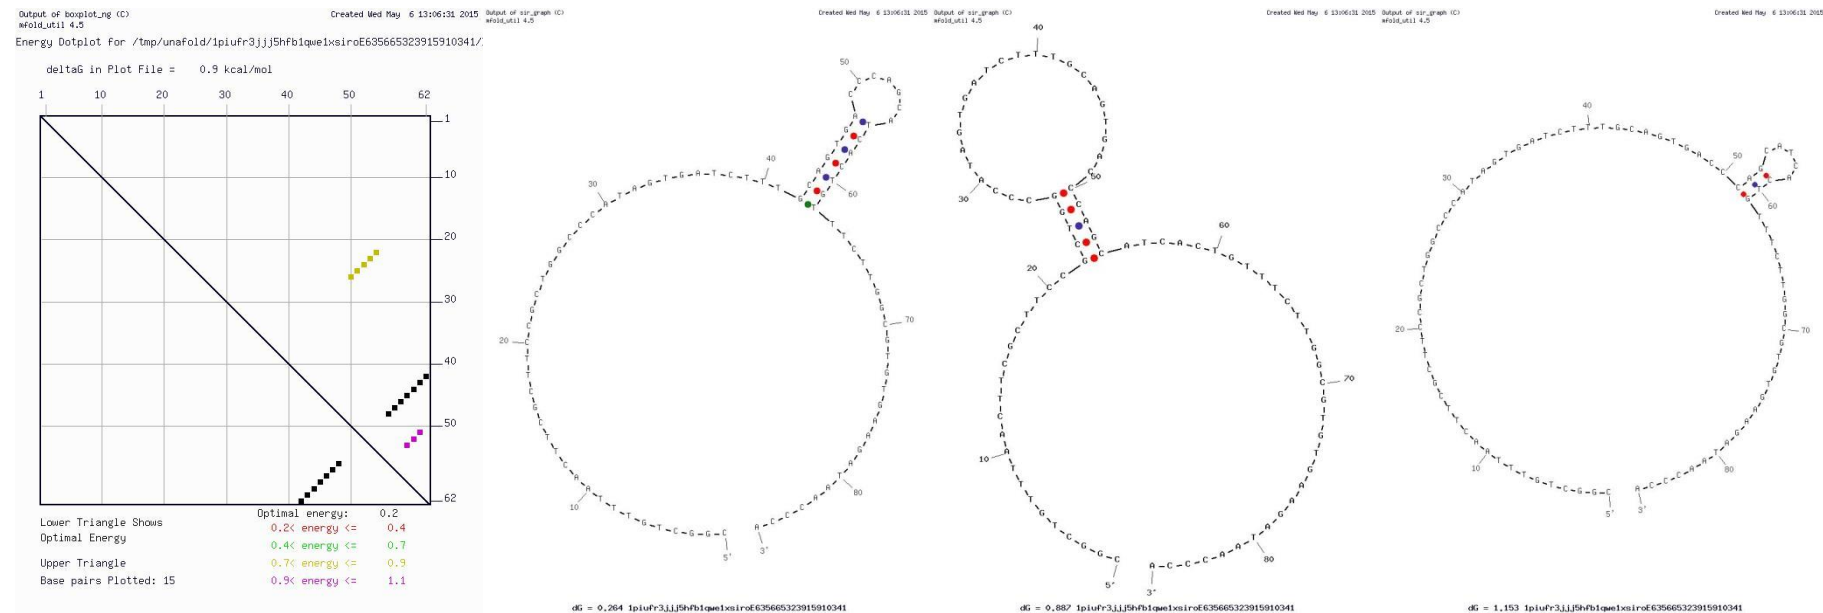



**Secondary Structures for Sense Primer**

Dimer:-

```

5' CGGCTGTTTAACTTCGCTTC 3'
  |   |   |   |
3' CCTTGGTTCAATTGTGGGC 5'
    
```

-0.8

```

5' CGGCTGTTTAACTTCGCTTC 3'
  |   |   |   |
3' CCTTGGTTCAATTGTGGGC 5'
    
```

-0.7

Hairpin:-

Not Found

**Secondary Structures for Anti-sense Primer**

Dimer:-

```

5' TGGTTATCTTCACAGCCAAG 3'
  ||| ||| ||| |||
3' GAACCGCACACTTCTATTGGGT 5'
    
```

-1.5

```

5' TGGTTATCTTCACAGCCAAG 3'
  ||| ||| ||| |||
  |   |   |   |
3' GAACCGCACACTTCTATTGGGT 5'
    
```

-0.5

Hairpin:-

```

/TCATTGGGT 5'
|   |   |
\TCACAGCCAAG 3'
    
```

-1.5

```

/ACACTTCTATTGGGT 5'
|   |   |
\GCCAAG 3'
    
```

-0.5

**Cross Dimer**

Cross Dimer between Sense Primer and Anti-sense Primer:-

```

5' CGGCTGTTTAACTTCGCTTC 3'
  ||| | ||| | |
3' GAACCGCACACTTCTATTGGGT 5'
    
```

-2.4

```

5' CGGCTGTTTAACTTCGCTTC 3'
  |   |   |   |
3' GAACCGCACACTTCTATTGGGT 5'
    
```

-1.4

```

5' CGGCTGTTTAACTTCGCTTC 3'
  |   |   |   |
3' GAACCGCACACTTCTATTGGGT 5'
    
```

-1.0

```

5' CGGCTGTTTAACTTCGCTTC 3'
  |   |   |
  |   |   |
3' GAACCGCACACTTCTATTGGGT 5'
    
```

-0.5

```

5' CGGCTGTTTAACTTCGCTTC 3'
  ||| ||| |
  |   |   |
3' GAACCGCACACTTCTATTGGGT 5'
    
```

-0.5

RPL22 PrimerBLAST (National Center for Biotechnology Information, Bethesda MD, USA, <https://www.ncbi.nlm.nih.gov/tools/primer-blast> )

| <b>Primer pair 1</b>                                                           |                                                                          |                      |        |       |      |       |       |                      |                         |
|--------------------------------------------------------------------------------|--------------------------------------------------------------------------|----------------------|--------|-------|------|-------|-------|----------------------|-------------------------|
|                                                                                | Sequence (5'->3')                                                        | Template strand      | Length | Start | Stop | Tm    | GC%   | Self complementarity | Self 3' complementarity |
| <b>Forward primer</b>                                                          | TGATTGCACCCACCCTGTAG                                                     | Plus                 | 20     | 115   | 134  | 62.18 | 55.00 | 4.00                 | 2.00                    |
| <b>Reverse primer</b>                                                          | GGTCCCAGCTTTCCGTTTC                                                      | Minus                | 20     | 212   | 193  | 61.84 | 55.00 | 4.00                 | 0.00                    |
| <b>Product length</b>                                                          | 98                                                                       |                      |        |       |      |       |       |                      |                         |
| <b>Total intron size</b>                                                       | 4597 (between pos. 5611664 and 5607066 on <a href="#">NT_032977.10</a> ) |                      |        |       |      |       |       |                      |                         |
| <b>Products on intended target</b>                                             |                                                                          |                      |        |       |      |       |       |                      |                         |
| > <a href="#">NM_000983.3</a> Homo sapiens ribosomal protein L22 (RPL22), mRNA |                                                                          |                      |        |       |      |       |       |                      |                         |
| product length = 98                                                            |                                                                          |                      |        |       |      |       |       |                      |                         |
| Forward primer                                                                 | 1                                                                        | TGATTGCACCCACCCTGTAG | 20     |       |      |       |       |                      |                         |
| Template                                                                       | 115                                                                      | .....                | 134    |       |      |       |       |                      |                         |
| Reverse primer                                                                 | 1                                                                        | GGTCCCAGCTTTCCGTTTC  | 20     |       |      |       |       |                      |                         |
| Template                                                                       | 212                                                                      | .....                | 193    |       |      |       |       |                      |                         |

RPL22 UCSC In-silico-PCR Genome Browser (Dec. 2013 GRCh38/hg38; UCSC Genes; Max. Product Size: 4000; Min. Perfect Match: 15; Min. Good Match: 15; Jim Kent, <http://genome-mirror.genomedk.au.dk/cgi-bin/hgPcr> ).

| <b>UCSC In-Silico PCR</b>                                                                                                                                                                                        |
|------------------------------------------------------------------------------------------------------------------------------------------------------------------------------------------------------------------|
| The sequences and coordinates shown below are from UCSC Genes, not from the genome assembly. The links lead to the Genome Browser at the position of the entire target sequence.                                 |
| > <a href="#">uc001amd.3</a> <a href="#">RPL22:115+212</a> 98bp TGATTGCACCCACCCTGTAG GGTCCCAGCTTTCCGTTTC<br>TGATTGCACCCACCCTGTAGaagatggaatcatggatgctgccaattttg<br>agcagtttttgaagaaggatcaaagtGAACGGAAAAGCTGGGAACC |
| > <a href="#">uc001ame.3</a> <a href="#">RPL22:115+212</a> 98bp TGATTGCACCCACCCTGTAG GGTCCCAGCTTTCCGTTTC<br>TGATTGCACCCACCCTGTAGaagatggaatcatggatgctgccaattttg<br>agcagtttttgaagaaggatcaaagtGAACGGAAAAGCTGGGAACC |

**RPL22** PrimerCheck (SpliceCenter der Genomics and Bioinformatics Group, LMP, CCR, NCI, <http://projects.insilico.us/SpliceCenter/PrimerCheck.jsp>)

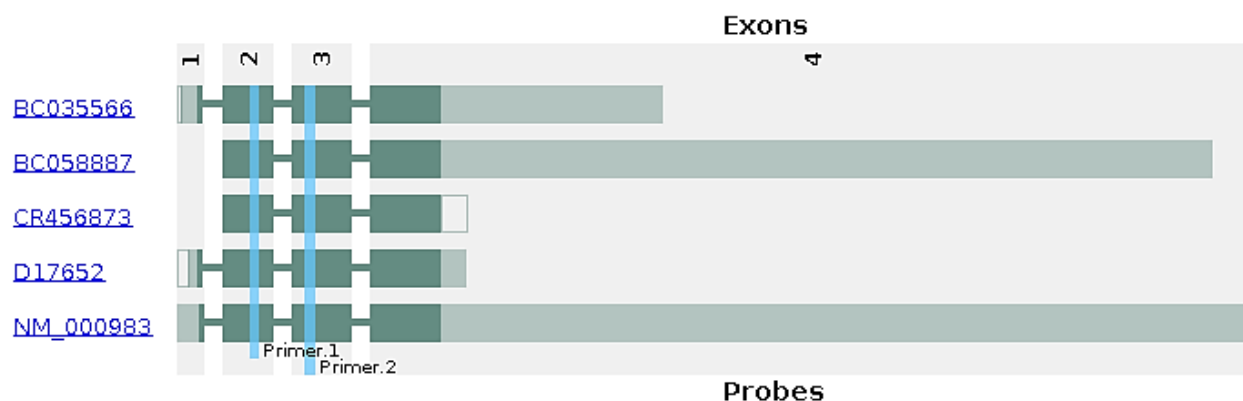

RPL22

**RPL22** UNAFold (Integrated DNA Technologies Inc., Coralville, IA, USA, <http://eu.idtdna.com/UNAFold?> , Suboptimality 50%)

*RPL22* Amplicon Sequence

5' TGATTGCACCCACCCTGTAGAAGATGGAATCATGGATGCTGCCAATTTTGAGCAGTTTTTGCAAGAAAGGATCAAAGTGAACGGAAAAGCTGGGAACC 3'

### Structures

| Structure Name | Image | $\Delta G$ (kcal.mole <sup>-1</sup> ) | $T_M$ (°C) | $\Delta H$ (kcal.mole <sup>-1</sup> ) | $\Delta S$ (cal.K <sup>-1</sup> mole <sup>-1</sup> ) | Output |
|----------------|-------|---------------------------------------|------------|---------------------------------------|------------------------------------------------------|--------|
| 1              |       | 0.34                                  | 56.4       | -30.8                                 | -93.47                                               | Ct Det |
| 2              |       | 0.34                                  | 52.5       | -14.9                                 | -45.75                                               | Ct Det |
| 3              |       | 0.68                                  | 52.9       | -31                                   | -95.09                                               | Ct Det |
| 4              |       | 1.17                                  | 44.3       | -23.8                                 | -74.97                                               | Ct Det |

Output of boxplot\_ng (C) Created Tue May 12 02:16:48 2015 Output of sir\_graph (C)  
 mfoldutil 4.2 mfoldutil 4.2

Created Tue May 12 02:16:48 2015 Output of sir\_graph (C)  
 mfoldutil 4.2

Created Tue May 12 02:16:48 2015 Output of sir\_graph (C)  
 mfoldutil 4.2

Created Tue May 12 02:16:48 2015

Energy Dotplot for /tmp/unafold/bsofenlofkbyxtpkwapvpgnhE635670118072100775/

deltaG in Plot File = 0.9 kcal/mol

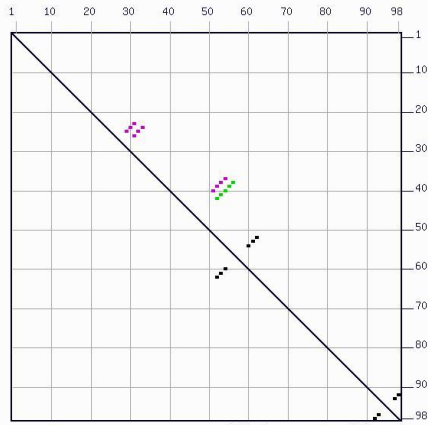

Lower Triangle Shows Optimal energy: 0.3  
 Optimal Energy 0.3 < energy <= 0.5  
 Upper Triangle 0.5 < energy <= 0.8  
 Base pairs Plotted: 20 0.8 < energy <= 1.0  
 1.0 < energy <= 1.2

Output of sir\_graph (C) Created Tue May 12 02:16:48 2015  
 mfoldutil 4.2

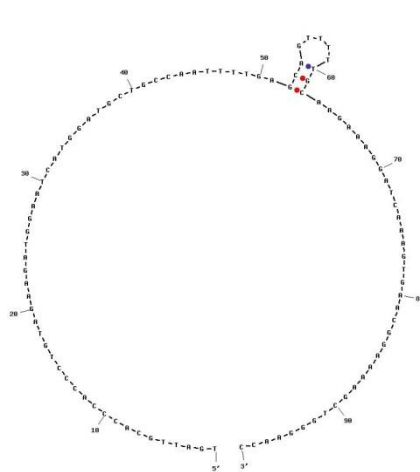

dG = 0.341 bsofenlofkbyxtpkwapvpgnhE635670118072100775

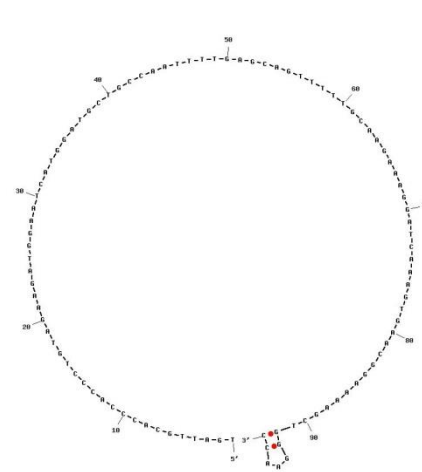

dG = 0.343 bsofenlofkbyxtpkwapvpgnhE635670118072100775

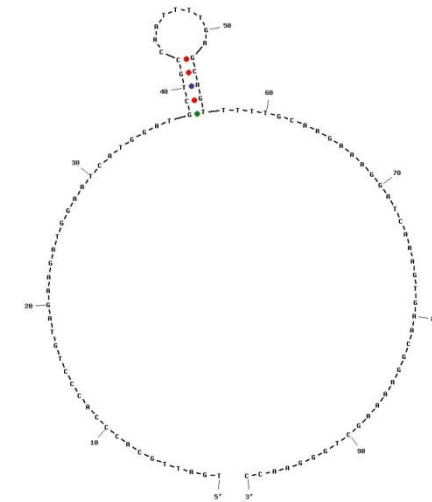

dG = 0.68 bsofenlofkbyxtpkwapvpgnhE635670118072100775

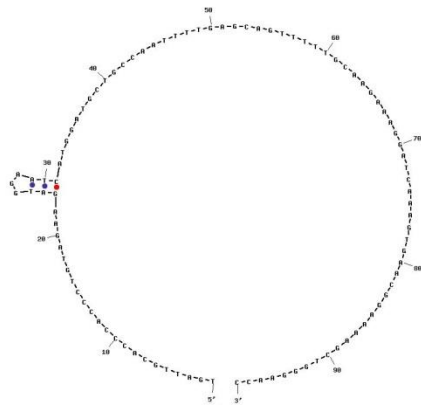

dG = 1.176 bsofenlofkbyxtpkwapvpgnhE635670118072100775

**Secondary Structures for Sense Primer**

**Dimer:-**

```

5' TGATTGCACCCACCCTGTAG 3'
   ||  ||||  ||
3' GATGTCACCCACGTTAGT 5'
    
```

-3.4

**Hairpin:-**

Not Found

**Secondary Structures for Anti-sense Primer**

**Dimer:-**

```

5' GGTICCCAGCTTTTCGGTTC 3'
   ||||
3' CTGTCCTTTTCGACCCCTGG 5'
    
```

-3.0

**Hairpin:-**

Not Found

**Cross Dimer**

**Cross Dimer between Sense Primer and Anti-sense Primer:-**

```

5' TGATTGCACCCACCCTGTAG 3'
   |           |||
3' CTGTCCTTTTCGACCCCTGG 5'
    
```

-1.5

```

5' TGATTGCACCCACCCTGTAG 3'
   |   |||
3' CTGTCCTTTTCGACCCCTGG 5'
    
```

-1.5

```

5' TGATTGCACCCACCCTGTAG 3'
   |   |   |||
3' CTGTCCTTTTCGACCCCTGG 5'
    
```

-1.1

**EEF1A1 PrimerBLAST** (National Center for Biotechnology Information, Bethesda MD, USA, <https://www.ncbi.nlm.nih.gov/tools/primer-blast> )

| <b>Primer pair 1</b>                                                                                                                              |                                                                          |                        |        |       |      |       |       |                      |                         |
|---------------------------------------------------------------------------------------------------------------------------------------------------|--------------------------------------------------------------------------|------------------------|--------|-------|------|-------|-------|----------------------|-------------------------|
|                                                                                                                                                   | Sequence (5'->3')                                                        | Template strand        | Length | Start | Stop | Tm    | GC%   | Self complementarity | Self 3' complementarity |
| <b>Forward primer</b>                                                                                                                             | CCTGCCTCTCCAGGATGTCTAC                                                   | Plus                   | 22     | 804   | 825  | 64.13 | 59.09 | 5.00                 | 2.00                    |
| <b>Reverse primer</b>                                                                                                                             | GGAGCAAAGGTGACCACCATAC                                                   | Minus                  | 22     | 908   | 887  | 63.70 | 54.55 | 6.00                 | 2.00                    |
| <b>Product length</b>                                                                                                                             | 105                                                                      |                        |        |       |      |       |       |                      |                         |
| <b>Total intron size</b>                                                                                                                          | 87 (between pos. 13288764 and 13288676 on <a href="#">NT_025741.16</a> ) |                        |        |       |      |       |       |                      |                         |
| <b>Products on intended target</b>                                                                                                                |                                                                          |                        |        |       |      |       |       |                      |                         |
| > <a href="#">NM_001402.5</a> Homo sapiens eukaryotic translation elongation factor 1 alpha 1 (EEF1A1), mRNA                                      |                                                                          |                        |        |       |      |       |       |                      |                         |
| product length = 105                                                                                                                              |                                                                          |                        |        |       |      |       |       |                      |                         |
| Forward primer                                                                                                                                    | 1                                                                        | CCTGCCTCTCCAGGATGTCTAC | 22     |       |      |       |       |                      |                         |
| Template                                                                                                                                          | 804                                                                      | .....                  | 825    |       |      |       |       |                      |                         |
| Reverse primer                                                                                                                                    | 1                                                                        | GGAGCAAAGGTGACCACCATAC | 22     |       |      |       |       |                      |                         |
| Template                                                                                                                                          | 908                                                                      | .....                  | 887    |       |      |       |       |                      |                         |
| <b>Products on allowed transcript variants</b>                                                                                                    |                                                                          |                        |        |       |      |       |       |                      |                         |
| > <a href="#">XM_011535514.1</a> PREDICTED: Homo sapiens eukaryotic translation elongation factor 1 alpha 1 (EEF1A1), transcript variant X1, mRNA |                                                                          |                        |        |       |      |       |       |                      |                         |
| product length = 105                                                                                                                              |                                                                          |                        |        |       |      |       |       |                      |                         |
| Forward primer                                                                                                                                    | 1                                                                        | CCTGCCTCTCCAGGATGTCTAC | 22     |       |      |       |       |                      |                         |
| Template                                                                                                                                          | 1349                                                                     | .....                  | 1370   |       |      |       |       |                      |                         |
| Reverse primer                                                                                                                                    | 1                                                                        | GGAGCAAAGGTGACCACCATAC | 22     |       |      |       |       |                      |                         |
| Template                                                                                                                                          | 1453                                                                     | .....                  | 1432   |       |      |       |       |                      |                         |

**EEF1A1 UCSC In-silico-PCR Genome Browser** (Dec. 2013 GRCh38/hg38; UCSC Genes; Max. Product Size: 4000; Min. Perfect Match: 15; Min. Good Match: 15; Jim Kent, <http://genome-mirror.genomedk.au.dk/cgi-bin/hgPcr> )

| <b>UCSC In-Silico PCR</b>                                                                                                                                                                                                            |
|--------------------------------------------------------------------------------------------------------------------------------------------------------------------------------------------------------------------------------------|
| The sequences and coordinates shown below are from UCSC Genes, not from the genome assembly. The links lead to the Genome Browser at the position of the entire target sequence.                                                     |
| > <a href="#">uc003phi.3</a> <a href="#">EEF1A1:1733+1837</a> 105bp CCTGCCTCTCCAGGATGTCTAC GGAGCAAAGGTGACCACCATAC<br>CCTGCCTCTCCAGGATGTCTACaaaattggtgattggtactgttctctg<br>ttggccgagtgagactggtgttctcaaacccgGTATGGTGGTCACCTTT<br>GCTCC |
| > <a href="#">uc033djt.1</a> <a href="#">EEF1A1:794+898</a> 105bp CCTGCCTCTCCAGGATGTCTAC GGAGCAAAGGTGACCACCATAC<br>CCTGCCTCTCCAGGATGTCTACaaaattggtgattggtactgttctctg<br>ttggccgagtgagactggtgttctcaaacccgGTATGGTGGTCACCTTT<br>GCTCC   |
| > <a href="#">uc003phj.3</a> <a href="#">EEF1A1:804+908</a> 105bp CCTGCCTCTCCAGGATGTCTAC GGAGCAAAGGTGACCACCATAC<br>CCTGCCTCTCCAGGATGTCTACaaaattggtgattggtactgttctctg<br>ttggccgagtgagactggtgttctcaaacccgGTATGGTGGTCACCTTT<br>GCTCC   |

EEF1A1 PrimerCheck (SpliceCenter der Genomics and Bioinformatics Group, LMP, CCR, NCI, <http://projects.insilico.us/SpliceCenter/PrimerCheck.jsp> )

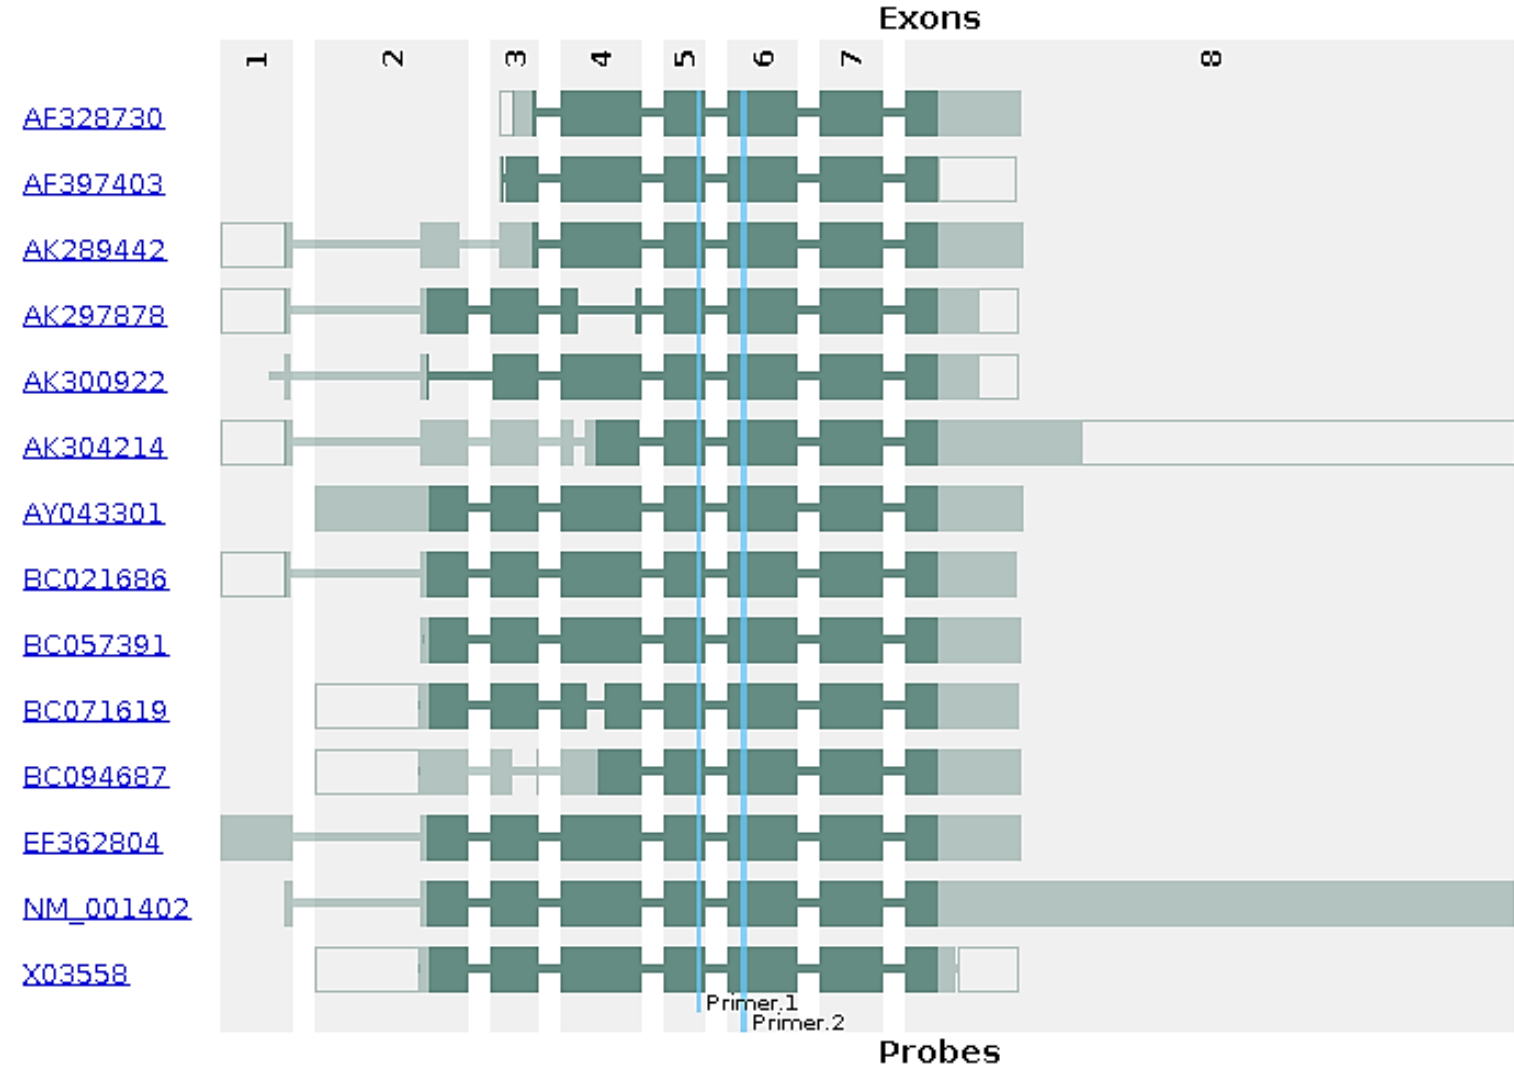

EEF1A1

**EEF1A1** UNAFold (Integrated DNA Technologies Inc., Coralville, IA, USA, <http://eu.idtdna.com/UNAFold?> , Suboptimality 50%)

*EEF1A1* Amplicon Sequence

5' CCTGCCTCTCCAGGATGTCTACAAAATTGGTGGTATTGGTACTGTTCTGTTGGCCGAGTGGAGACTGGTGTCTCAAACCCGGTATGGTGGTCACCTTTGCTCC 3'

## Structures

| Structure Name | Image                                                                               | $\Delta G$ (kcal.mole <sup>-1</sup> ) | T <sub>M</sub> (°C) | $\Delta H$ (kcal.mole <sup>-1</sup> ) | $\Delta S$ (cal.K <sup>-1</sup> mole <sup>-1</sup> ) | Output |
|----------------|-------------------------------------------------------------------------------------|---------------------------------------|---------------------|---------------------------------------|------------------------------------------------------|--------|
| 1              |    | 0.5                                   | 54.3                | -28.9                                 | -88.25                                               | Ct Det |
| 2              |    | 0.59                                  | 49.7                | -18.5                                 | -57.3                                                | Ct Det |
| 3              |    | 0.63                                  | 48.7                | -18.1                                 | -56.23                                               | Ct Det |
| 4              |    | 0.84                                  | 45.1                | -18                                   | -56.56                                               | Ct Det |
| 5              |    | 0.87                                  | 51.3                | -32.5                                 | -100.18                                              | Ct Det |
| 6              |   | 1.12                                  | 40.6                | -18.2                                 | -58.01                                               | Ct Det |
| 7              |  | 1.33                                  | 43.5                | -25.4                                 | -80.22                                               | Ct Det |
| 8              |  | 1.39                                  | 18.4                | -9.7                                  | -33.28                                               | Ct Det |
| 9              |  | 1.44                                  | 15.8                | -9.4                                  | -32.53                                               | Ct Det |



Output of bioplot\_ng (C)  
 MS16\_L11 4.5  
 Created Tue May 12 02:25:16 2015  
 Output of si\_r\_graph (C)  
 MS16\_L11 4.5

Created Tue May 12 02:25:16 2015  
 Output of si\_r\_graph (C)  
 MS16\_L11 4.5

Created Tue May 12 02:25:16 2015  
 Output of si\_r\_graph (C)  
 MS16\_L11 4.5

Created Tue May 12 02:25:16 2015

Energy Dotplot for /tmp/unafold/bsofenlofkbxtpkawpvpgrhE635670123149762224/

deltaG in Plot File = 0.9 kcal/mol

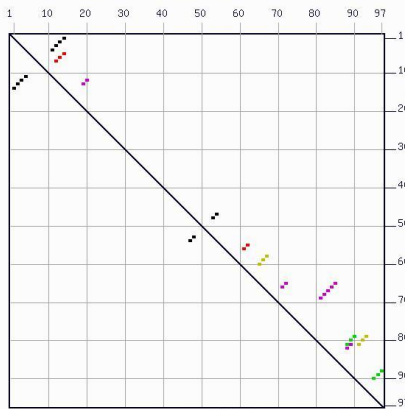

Lower Triangle Shows  
 Optimal Energy  
 Upper Triangle  
 Base pairs Plotted: 34

Optimal energy: 0.5  
 0.5 <= energy <= 0.7  
 0.7 < energy <= 0.9  
 0.9 < energy <= 1.2  
 1.2 < energy <= 1.4

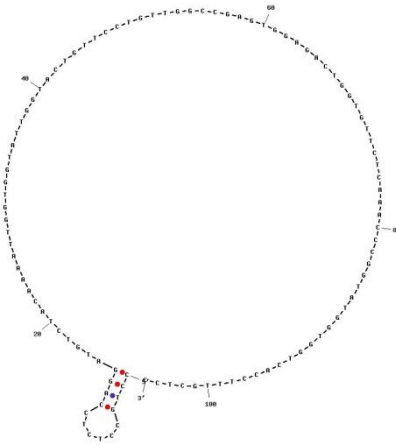

dG = 0.502 bsofenlofkbxtpkawpvpgrhE635670123149762224

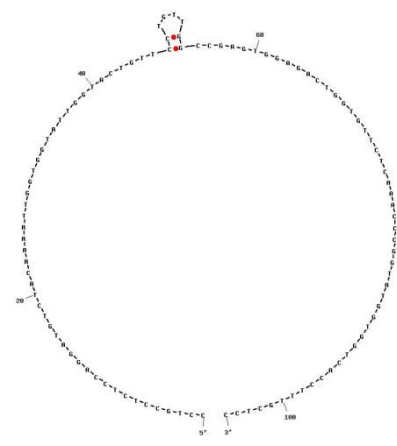

dG = 0.589 bsofenlofkbxtpkawpvpgrhE635670123149762224

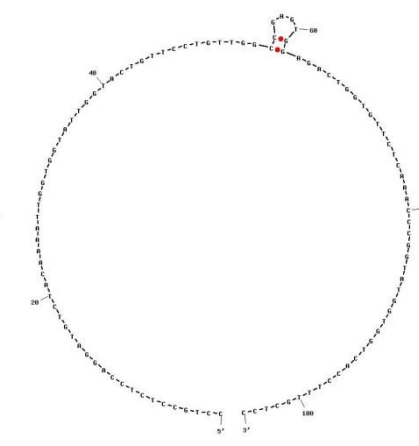

dG = 0.634 bsofenlofkbxtpkawpvpgrhE635670123149762224

Output of si\_r\_graph (C)  
 MS16\_L11 4.5

Created Tue May 12 02:25:16 2015  
 Output of si\_r\_graph (C)  
 MS16\_L11 4.5

Created Tue May 12 02:25:16 2015  
 Output of si\_r\_graph (C)  
 MS16\_L11 4.5

Created Tue May 12 02:25:16 2015  
 Output of si\_r\_graph (C)  
 MS16\_L11 4.5

Created Tue May 12 02:25:16 2015

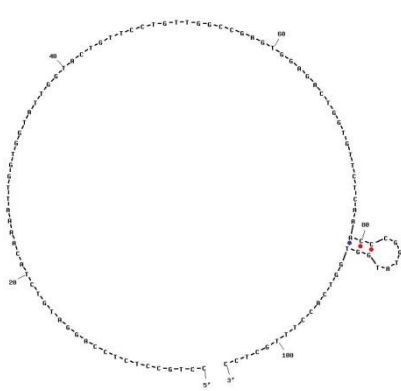

dG = 0.842 bsofenlofkbxtpkawpvpgrhE635670123149762224

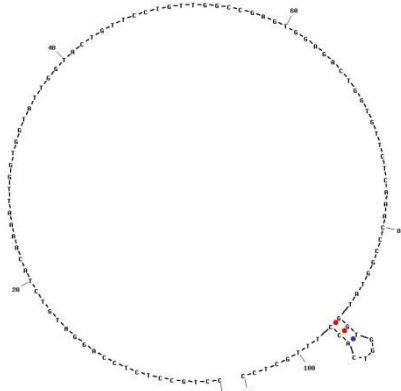

dG = 0.875 bsofenlofkbxtpkawpvpgrhE635670123149762224

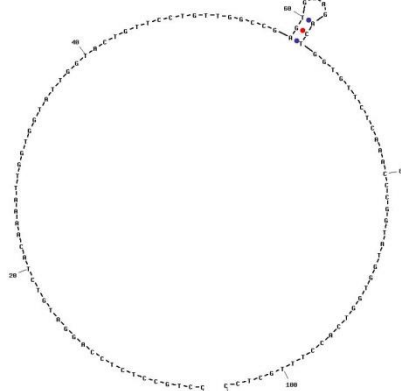

dG = 1.126 bsofenlofkbxtpkawpvpgrhE635670123149762224

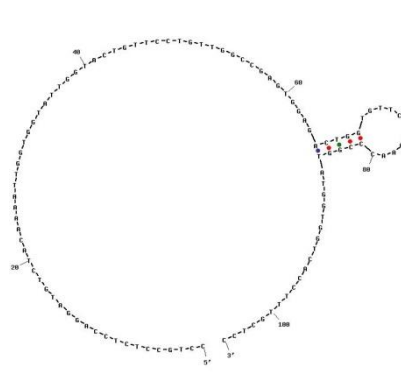

dG = 1.328 bsofenlofkbxtpkawpvpgrhE635670123149762224

Output of cir\_graph (C)  
WHL6\_011\_1-2

Created Tue May 12 02:25:16 2015 Output of cir\_graph (C)  
WHL6\_011\_1-2

Created Tue May 12 02:25:16 2015

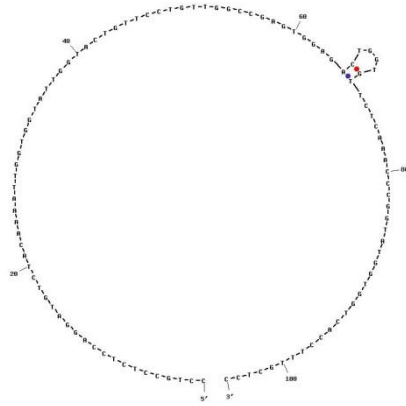

dG = 1,386 bsofenlofkbpptkwappprhE635670123149762224

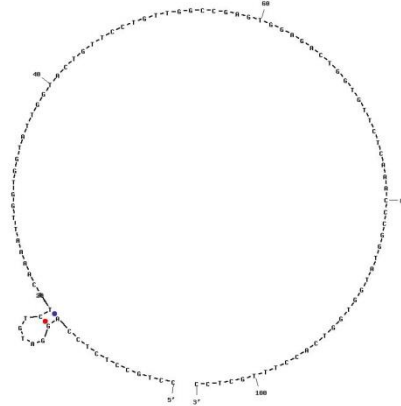

dG = 1,44 bsofenlofkbpptkwappprhE635670123149762224

| Secondary Structures for Sense Primer                                                                       | Cross Dimer                                                                                               |      |
|-------------------------------------------------------------------------------------------------------------|-----------------------------------------------------------------------------------------------------------|------|
| <b>Dimer:-</b>                                                                                              |                                                                                                           |      |
| <pre> 5' CCTGCCTCTCCAGGATGTCTAC 3'               3' CATCTGTAGGACCTCTCCGTCC 5'                     </pre>    | -3.0                                                                                                      |      |
| <pre> 5' CCTGCCTCTCCAGGATGTCTAC 3'                 3' CATCTGTAGGACCTCTCCGTCC 5'                     </pre>  | -1.3                                                                                                      |      |
| <pre> 5' CCTGCCTCTCCAGGATGTCTAC 3'                 3' CATCTGTAGGACCTCTCCGTCC 5'                     </pre>  | -1.3                                                                                                      |      |
| <b>Hairpin:-</b>                                                                                            |                                                                                                           |      |
| <pre> /TCGTCC 5'        \CTCCAGGATGTCTAC 3'                     </pre>                                      | -3.0                                                                                                      |      |
| <pre> /TCGTCC 5'        \CCAGGATGTCTAC 3'                     </pre>                                        | -1.3                                                                                                      |      |
| <b>Secondary Structures for Anti-sense Primer</b>                                                           |                                                                                                           |      |
| <b>Dimer:-</b>                                                                                              |                                                                                                           |      |
| <pre> 5' GGAGCAAAGGTGACCACCATAC 3'                 3' CATACCACCAAGTGGAAACGAGG 5'                     </pre> | -3.2                                                                                                      |      |
| <pre> 5' GGAGCAAAGGTGACCACCATAC 3'                 3' CATACCACCAAGTGGAAACGAGG 5'                     </pre> | -1.5                                                                                                      |      |
| <b>Hairpin:-</b>                                                                                            |                                                                                                           |      |
| <pre> /AGTGGAAACGAGG 5'        \CCACCATAC 3'                     </pre>                                     | -1.5                                                                                                      |      |
|                                                                                                             | <b>Cross Dimer between Sense Primer and Anti-sense Primer:-</b>                                           |      |
|                                                                                                             | <pre> 5' CCTGCCTCTCCAGGATGTCTAC 3'               3' CATACCACCAAGTGGAAACGAGG 5'                     </pre> | -2.9 |
|                                                                                                             | <pre> 5' CCTGCCTCTCCAGGATGTCTAC 3'           3' CATACCACCAAGTGGAAACGAGG 5'                     </pre>     | -2.0 |
|                                                                                                             | <pre> 5' CCTGCCTCTCCAGGATGTCTAC 3'           3' CATACCACCAAGTGGAAACGAGG 5'                     </pre>     | -1.3 |
|                                                                                                             | <pre> 5' CCTGCCTCTCCAGGATGTCTAC 3'           3' CATACCACCAAGTGGAAACGAGG 5'                     </pre>     | -1.3 |
|                                                                                                             | <pre> 5' CCTGCCTCTCCAGGATGTCTAC 3'           3' CATACCACCAAGTGGAAACGAGG 5'                     </pre>     | -1.3 |
|                                                                                                             | <pre> 5' CCTGCCTCTCCAGGATGTCTAC 3'               3' CATACCACCAAGTGGAAACGAGG 5'                     </pre> | -1.1 |
|                                                                                                             | <pre> 5' CCTGCCTCTCCAGGATGTCTAC 3'            3' CATACCACCAAGTGGAAACGAGG 5'                     </pre>    | -1.0 |
|                                                                                                             | <pre> 5' CCTGCCTCTCCAGGATGTCTAC 3'        3' CATACCACCAAGTGGAAACGAGG 5'                     </pre>        | -0.5 |

**RPLP0 PrimerBLAST** (National Center for Biotechnology Information, Bethesda MD, USA, <https://www.ncbi.nlm.nih.gov/tools/primer-blast> )

| <b>Primer pair 1</b>                                                                                        |                                                                            |                        |        |       |      |       |       |                      |                         |  |
|-------------------------------------------------------------------------------------------------------------|----------------------------------------------------------------------------|------------------------|--------|-------|------|-------|-------|----------------------|-------------------------|--|
|                                                                                                             | Sequence (5'->3')                                                          | Template strand        | Length | Start | Stop | Tm    | GC%   | Self complementarity | Self 3' complementarity |  |
| <b>Forward primer</b>                                                                                       | GAAACTCTGCATTCTCGCTTCC                                                     | Plus                   | 22     | 802   | 823  | 62.34 | 50.00 | 4.00                 | 0.00                    |  |
| <b>Reverse primer</b>                                                                                       | GACTCGTTTGTACCCGTTGATG                                                     | Minus                  | 22     | 921   | 900  | 62.01 | 50.00 | 4.00                 | 0.00                    |  |
| <b>Product length</b>                                                                                       | 120                                                                        |                        |        |       |      |       |       |                      |                         |  |
| <b>Total intron size</b>                                                                                    | 1091 (between pos. 82963302 and 82962210 on <a href="#">NT_029419.13</a> ) |                        |        |       |      |       |       |                      |                         |  |
| <b>Products on intended target</b>                                                                          |                                                                            |                        |        |       |      |       |       |                      |                         |  |
| > <a href="#">NM_001002.3</a> Homo sapiens ribosomal protein, large, P0 (RPLP0), transcript variant 1, mRNA |                                                                            |                        |        |       |      |       |       |                      |                         |  |
| product length = 120                                                                                        |                                                                            |                        |        |       |      |       |       |                      |                         |  |
| Forward primer                                                                                              | 1                                                                          | GAAACTCTGCATTCTCGCTTCC | 22     |       |      |       |       |                      |                         |  |
| Template                                                                                                    | 802                                                                        | .....                  | 823    |       |      |       |       |                      |                         |  |
| Reverse primer                                                                                              | 1                                                                          | GACTCGTTTGTACCCGTTGATG | 22     |       |      |       |       |                      |                         |  |
| Template                                                                                                    | 921                                                                        | .....                  | 900    |       |      |       |       |                      |                         |  |
| <b>Products on allowed transcript variants</b>                                                              |                                                                            |                        |        |       |      |       |       |                      |                         |  |
| > <a href="#">NM_053275.3</a> Homo sapiens ribosomal protein, large, P0 (RPLP0), transcript variant 2, mRNA |                                                                            |                        |        |       |      |       |       |                      |                         |  |
| product length = 120                                                                                        |                                                                            |                        |        |       |      |       |       |                      |                         |  |
| Forward primer                                                                                              | 1                                                                          | GAAACTCTGCATTCTCGCTTCC | 22     |       |      |       |       |                      |                         |  |
| Template                                                                                                    | 862                                                                        | .....                  | 883    |       |      |       |       |                      |                         |  |
| Reverse primer                                                                                              | 1                                                                          | GACTCGTTTGTACCCGTTGATG | 22     |       |      |       |       |                      |                         |  |
| Template                                                                                                    | 981                                                                        | .....                  | 960    |       |      |       |       |                      |                         |  |

**RPLP0 UCSC In-silico-PCR Genome Browser** (Dec. 2013 GRCh38/hg38; UCSC Genes; Max. Product Size: 4000; Min. Perfect Match: 15; Min. Good Match: 15; Jim Kent, <http://genome-mirror.genomedk.au.dk/cgi-bin/hgPcr> ).

| <b>UCSC In-Silico PCR</b>                                                                                                                                                                                                            |
|--------------------------------------------------------------------------------------------------------------------------------------------------------------------------------------------------------------------------------------|
| The sequences and coordinates shown below are from UCSC Genes, not from the genome assembly. The links lead to the Genome Browser at the position of the entire target sequence.                                                     |
| > <a href="#">uc001txp.3_RPLP0:862+981</a> 120bp GAAACTCTGCATTCTCGCTTCC GACTCGTTTGTACCCGTTGATG<br>GAAACTCTGCATTCTCGCTTCCctggagggtgtccgcaatgttgccagtgt<br>ctgtctgcagattggctacccaactgttgcacatcagtaacccattctatCA<br>TCAACGGGTACAACGAGTC |
| > <a href="#">uc001txq.3_RPLP0:802+921</a> 120bp GAAACTCTGCATTCTCGCTTCC GACTCGTTTGTACCCGTTGATG<br>GAAACTCTGCATTCTCGCTTCCctggagggtgtccgcaatgttgccagtgt<br>ctgtctgcagattggctacccaactgttgcacatcagtaacccattctatCA<br>TCAACGGGTACAACGAGTC |

RPLP0 PrimerCheck (SpliceCenter der Genomics and Bioinformatics Group, LMP, CCR, NCI, <http://projects.insilico.us/SpliceCenter/PrimerCheck.jsp> )

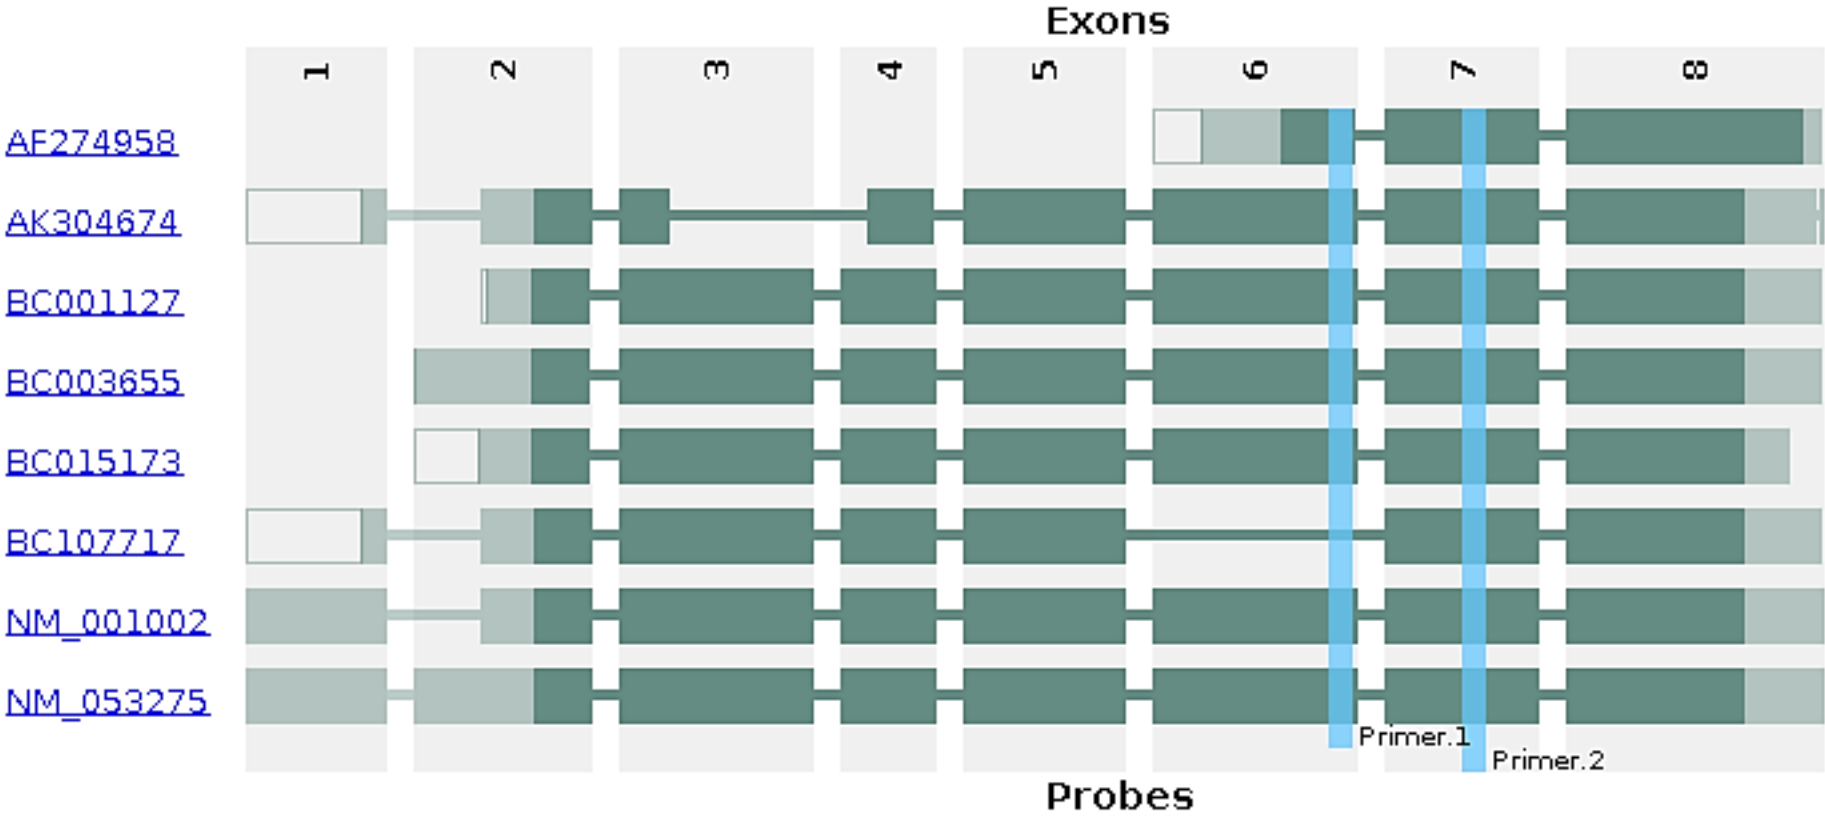

RPLP0

**RPLP0** UNAFold (Integrated DNA Technologies Inc., Coralville, IA, USA, <http://eu.idtdna.com/UNAFold?> , Suboptimality 50%)

*RPLP0 Amplicon Sequence*

5' GAAACTCTGCATTCTCGCTTCTGGAGGGTGTCCGCAATGTTGCCAGTGTCTGTCTGCAGATTGGCTACCCAAGTGTGCATCAGTACCCATTCTATCATCAACGGGTACAAACGAGTC 3'

**Structures**

| Structure Name | Image                                                                               | $\Delta G$ (kcal.mole <sup>-1</sup> ) | T <sub>M</sub> (°C) | $\Delta H$ (kcal.mole <sup>-1</sup> ) | $\Delta S$ (cal.K <sup>-1</sup> mole <sup>-1</sup> ) | Output |
|----------------|-------------------------------------------------------------------------------------|---------------------------------------|---------------------|---------------------------------------|------------------------------------------------------|--------|
| 1              |    | 0.15                                  | 59                  | -51                                   | -153.54                                              | Ct Det |
| 2              |    | 0.67                                  | 52.1                | -27.6                                 | -84.86                                               | Ct Det |
| 3              |    | 0.69                                  | 52.3                | -29.1                                 | -89.41                                               | Ct Det |
| 4              |    | 0.76                                  | 50.8                | -26.9                                 | -83.03                                               | Ct Det |
| 5              |    | 0.85                                  | 49.4                | -25.9                                 | -80.29                                               | Ct Det |
| 6              |   | 0.95                                  | 55.1                | -63.5                                 | -193.46                                              | Ct Det |
| 7              |  | 1.12                                  | 42.1                | -19.7                                 | -62.49                                               | Ct Det |

Output of boxplot\_ng (C) Created Tue May 12 02:25:08 2015 Output of sir\_graph (C)  
 vfoldutil 4.2 vfoldutil 4.2

Created Tue May 12 02:25:08 2015 Output of sir\_graph (C)  
 vfoldutil 4.2

Created Tue May 12 02:25:08 2015 Output of sir\_graph (C)  
 vfoldutil 4.2

Created Tue May 12 02:25:08 2015

Energy Dotplot For /tmp/unaFold/g2oglu40cn432yvedfz0w4cyE635670141088474402/

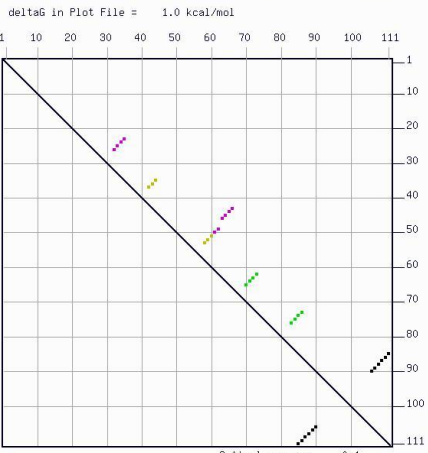

Lower Triangle Shows  
 Optimal Energy  
 Upper Triangle  
 Base pairs Plotted: 30

Optimal energy: 0.1  
 0.1 < energy <= 0.3  
 0.3 < energy <= 0.6  
 0.6 < energy <= 0.8  
 0.8 < energy <= 1.1

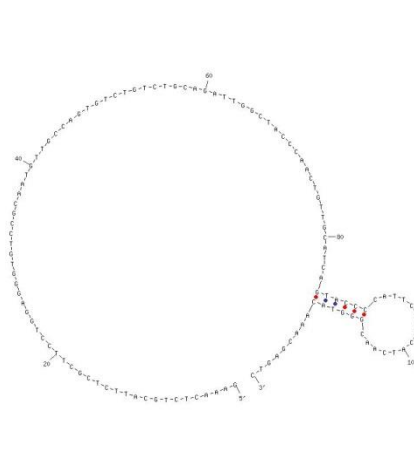

$\Delta G = 0.153$  g2oglu40cn432yvedfz0w4cyE635670141088474402

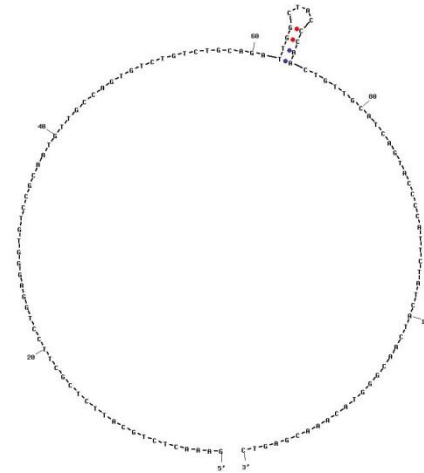

$\Delta G = 0.674$  g2oglu40cn432yvedfz0w4cyE635670141088474402

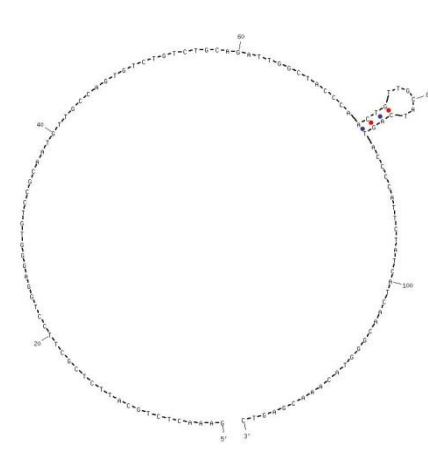

$\Delta G = 0.689$  g2oglu40cn432yvedfz0w4cyE635670141088474402

Output of sir\_graph (C) Created Tue May 12 02:25:08 2015 Output of sir\_graph (C)  
 vfoldutil 4.2 vfoldutil 4.2

Created Tue May 12 02:25:08 2015 Output of sir\_graph (C)  
 vfoldutil 4.2

Created Tue May 12 02:25:08 2015 Output of sir\_graph (C)  
 vfoldutil 4.2

Created Tue May 12 02:25:08 2015

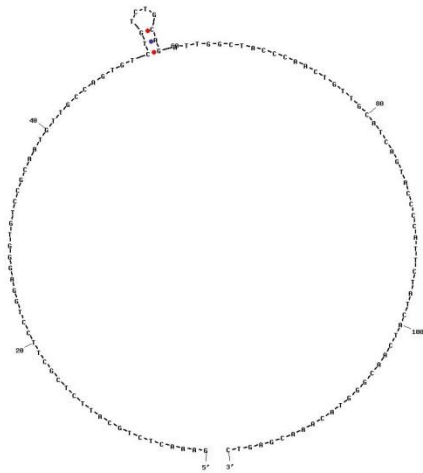

$\Delta G = 0.761$  g2oglu40cn432yvedfz0w4cyE635670141088474402

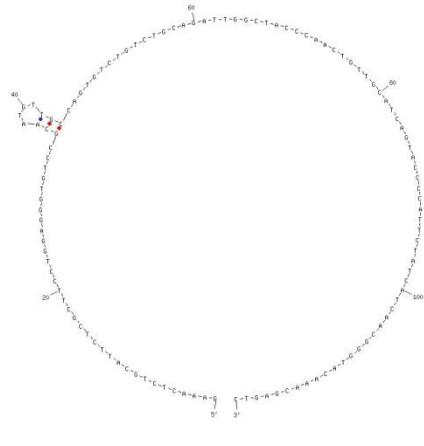

$\Delta G = 0.848$  g2oglu40cn432yvedfz0w4cyE635670141088474402

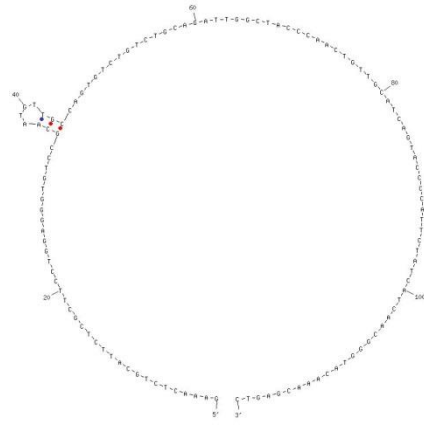

$\Delta G = 0.848$  g2oglu40cn432yvedfz0w4cyE635670141088474402

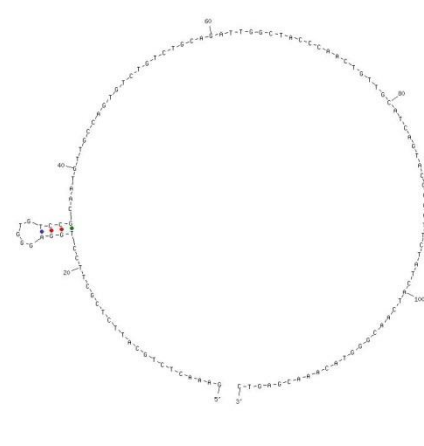

$\Delta G = 1.119$  g2oglu40cn432yvedfz0w4cyE635670141088474402

**Secondary Structures for Sense Primer**

**Dimer:-**

```

5' GAAACTCTGCATTCTCGCTTCC 3'
  | | | | |
3' CCTTCGCTCTTACGTCTCAAAG 5'
    
```

-3.4

```

5' GAAACTCTGCATTCTCGCTTCC 3'
  | | | | |
3' CCTTCGCTCTTACGTCTCAAAG 5'
    
```

-0.6

```

5' GAAACTCTGCATTCTCGCTTCC 3'
  | | | | |
3' CCTTCGCTCTTACGTCTCAAAG 5'
    
```

-0.6

**Hairpin:-**

```

/CGTCTCAAAG 5'
A   | | | |
\TTCGCTTCC 3'
    
```

-0.6

```

/CTCAAAG 5'
|   | | |
\TGCATTCTCGCTTCC 3'
    
```

-0.6

**Secondary Structures for Anti-sense Primer**

**Dimer:-**

```

5' GACTCGTTTGACCGTTGATG 3'
  | | | | |
3' GTAGTTGCCCATGTTTGCTCAG 5'
    
```

-2.0

**Hairpin:-**

Not Found

**Cross Dimer**

**Cross Dimer between Sense Primer and Anti-sense Primer:-**

```

5' GAAACTCTGCATTCTCGCTTCC 3'
  | | | | |
3' GTAGTTGCCCATGTTTGCTCAG 5'
    
```

-1.8

```

5' GAAACTCTGCATTCTCGCTTCC 3'
  | | | | |
3' GTAGTTGCCCATGTTTGCTCAG 5'
    
```

-0.7

```

5' GAAACTCTGCATTCTCGCTTCC 3'
  | | | | |
3' GTAGTTGCCCATGTTTGCTCAG 5'
    
```

-0.5



**RNA18S5** PrimerBLAST (National Center for Biotechnology Information, Bethesda MD, USA, <https://www.ncbi.nlm.nih.gov/tools/primer-blast> )

| <b>Primer pair 1</b>  |                        |                 |        |       |      |       |       |                      |                         |  |
|-----------------------|------------------------|-----------------|--------|-------|------|-------|-------|----------------------|-------------------------|--|
|                       | Sequence (5'->3')      | Template strand | Length | Start | Stop | Tm    | GC%   | Self complementarity | Self 3' complementarity |  |
| <b>Forward primer</b> | AACTGCGAATGGCTCATTAATC | Plus            | 23     | 84    | 106  | 60.55 | 39.13 | 6.00                 | 3.00                    |  |
| <b>Reverse primer</b> | GCCCGTCGGCATGTATTAG    | Minus           | 19     | 186   | 168  | 60.86 | 57.89 | 5.00                 | 1.00                    |  |
| <b>Product length</b> | 103                    |                 |        |       |      |       |       |                      |                         |  |

**RNA18S5** UCSC In-silico-PCR Genome Browser (Dec. 2013 GRCh38/hg38; UCSC Genes; Max. Product Size: 4000; Min. Perfect Match: 15; Min. Good Match: 15; Jim Kent, <http://genome-mirror.genomedk.au.dk/cgi-bin/hgPcr> ).

**UCSC In-Silico PCR**

The sequences and coordinates shown below are from UCSC Genes, not from the genome assembly. The links lead to the Genome Browser at the position of the entire target sequence.

```
>uc032qts.1_RNA45S5:3742+3844 103bp AACTGCGAATGGCTCATTAATC GCCCGTCGGCATGTATTAG
AACTGCGAATGGCTCATTAATCagttatggttcctttggtcgctcgctc
ctctcctacttgataaactgtgtaattctagagCTAATACATGCCGACG
GGC

>uc032ptn.1_RNA18S5:84+186 103bp AACTGCGAATGGCTCATTAATC GCCCGTCGGCATGTATTAG
AACTGCGAATGGCTCATTAATCagttatggttcctttggtcgctcgctc
ctctcctacttgataaactgtgtaattctagagCTAATACATGCCGACG
GGC

>uc032ptu.1_RNA45S5:3738+3840 103bp AACTGCGAATGGCTCATTAATC GCCCGTCGGCATGTATTAG
AACTGCGAATGGCTCATTAATCagttatggttcctttggtcgctcgctc
ctctcctacttgataaactgtgtaattctagagCTAATACATGCCGACG
GGC

>uc033dni.1_RNA18S5:84+186 103bp AACTGCGAATGGCTCATTAATC GCCCGTCGGCATGTATTAG
AACTGCGAATGGCTCATTAATCagttatggttcctttggtcgctcgctc
ctctcctacttgataaactgtgtaattctagagCTAATACATGCCGACG
GGC

>uc032pst.1_RNA18S5:84+186 103bp AACTGCGAATGGCTCATTAATC GCCCGTCGGCATGTATTAG
AACTGCGAATGGCTCATTAATCagttatggttcctttggtcgctcgctc
ctctcctacttgataaactgtgtaattctagagCTAATACATGCCGACG
GGC

>uc032qty.1_RNA18S5:84+186 103bp AACTGCGAATGGCTCATTAATC GCCCGTCGGCATGTATTAG
AACTGCGAATGGCTCATTAATCagttatggttcctttggtcgctcgctc
ctctcctacttgataaactgtgtaattctagagCTAATACATGCCGACG
GGC

>uc033dng.1_RNA45S5:3738+3840 103bp AACTGCGAATGGCTCATTAATC GCCCGTCGGCATGTATTAG
AACTGCGAATGGCTCATTAATCagttatggttcctttggtcgctcgctc
ctctcctacttgataaactgtgtaattctagagCTAATACATGCCGACG
GGC
```

**RNA18S5 UNAFold** (Integrated DNA Technologies Inc., Coralville, IA, USA, <http://eu.idtdna.com/UNAFold?> , Suboptimality 50%)

*RNA18S5 Amplicon Sequence*

5' AACTGCGAATGGCTCATTAAATCAGTTATGGTTCCTTTGGTCGCTCGCTCCTCTCCTACTTGGATAACTGTGGTAATTCTAGAGCTAATACATGCCGACGGGC 3'

### Structures

| Structure Name | Image                                                                             | $\Delta G$ (kcal.mole <sup>-1</sup> ) | T <sub>M</sub> (°C) | $\Delta H$ (kcal.mole <sup>-1</sup> ) | $\Delta S$ (cal.K <sup>-1</sup> mole <sup>-1</sup> ) | Output |
|----------------|-----------------------------------------------------------------------------------|---------------------------------------|---------------------|---------------------------------------|------------------------------------------------------|--------|
| 1              |  | 0.08                                  | 58.9                | -25.6                                 | -77.09                                               | Ct Det |
| 2              |  | 0.77                                  | 47.2                | -19.4                                 | -60.55                                               | Ct Det |
| 3              |  | 0.99                                  | 46.1                | -22.8                                 | -71.42                                               | Ct Det |

Output of boxplot\_rn (C) Created Tue May 12 03:07:10 2015 Output of dotplot (C)   
 rfold\_vt11 4.5 mfold\_v11 4.2

Created Tue May 12 03:07:10 2015 Output of dotplot (C)   
 mfold\_v11 4.2

Created Tue May 12 03:07:10 2015 Output of dotplot (C)   
 mfold\_v11 4.2

Created Tue May 12 03:07:10 2015

Energy Dotplot For /tmp/unaFold/g2og1u40cn432yvedfz0w4cyE635670148308723705/

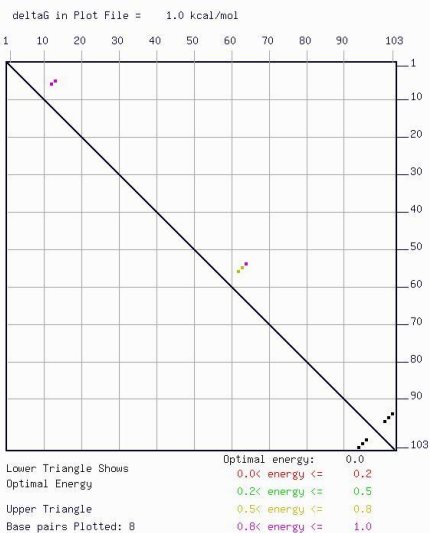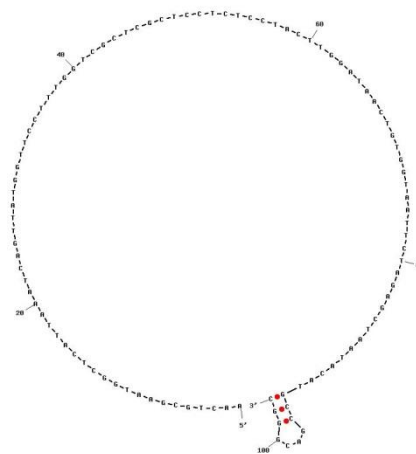

delta G = 0.084 g2og1u40cn432yvedfz0w4cyE635670148308723705

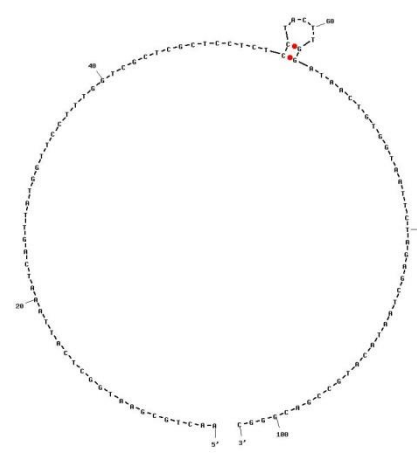

delta G = 0.773 g2og1u40cn432yvedfz0w4cyE635670148308723705

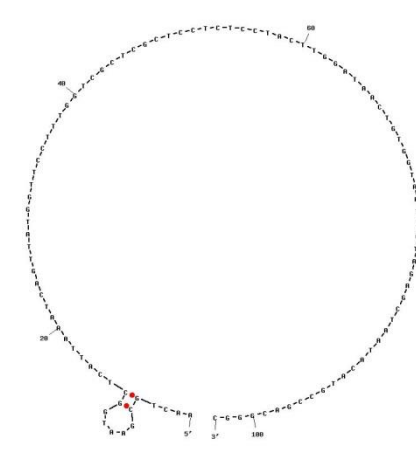

delta G = 0.993 g2og1u40cn432yvedfz0w4cyE635670148308723705

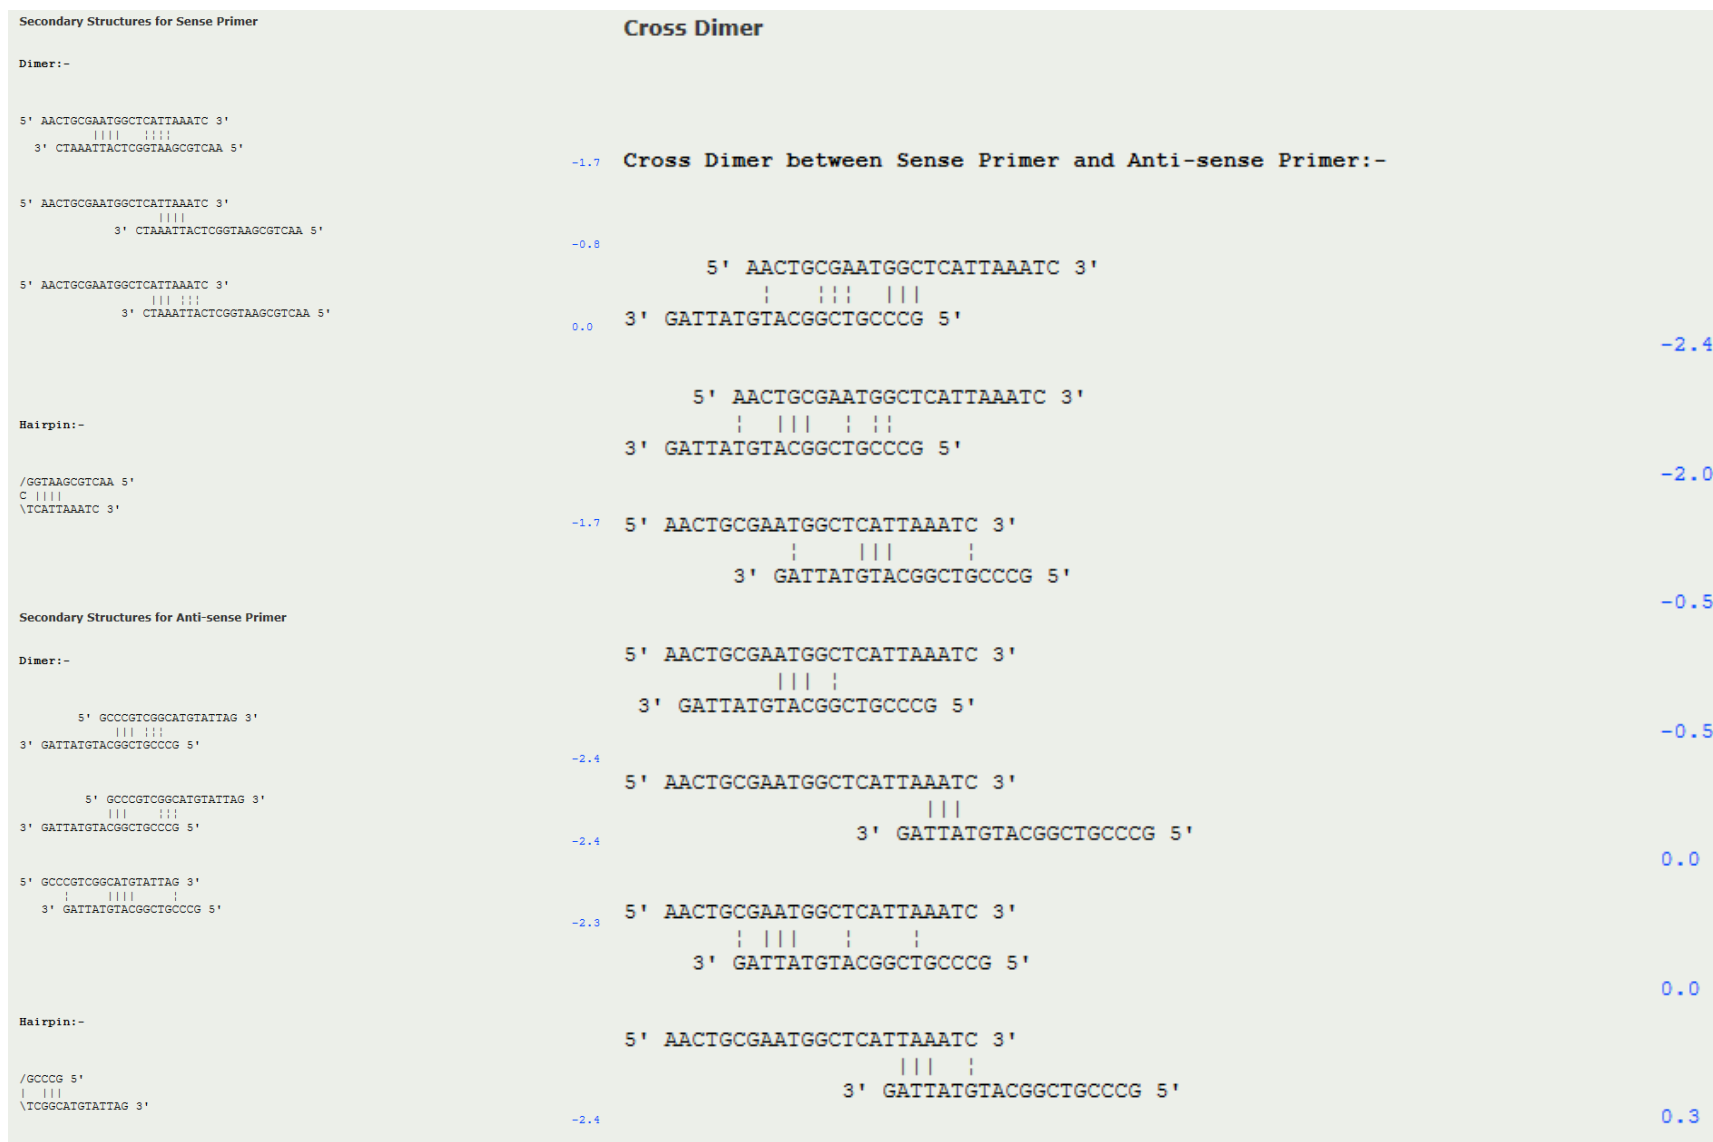

**Supplementary Data 2.** RNA integrity analysis. Experimental groups: K7-K12 = control; D7-D12 = compressive orthodontic force; Agac7-Agac12 = bacterial lysate (periodontitis).

Assay Class: Eukaryote Total RNA Nano  
 Data Path: E:\...Eukaryote Total RNA Nano\_DE72901710\_2017-03-08\_10-01-40.xad

Created: 08.03.2017 10:01:40  
 Modified: 08.03.2017 10:25:31

**Electrophoresis File Run Summary**

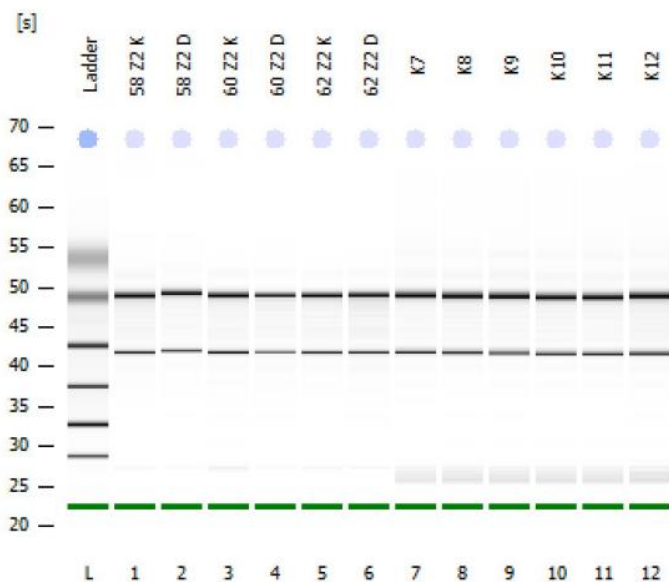

**Instrument Information:**  
 Instrument Name: DE72901710      Firmware: C.01.069  
 Serial#: DE72901710      Type: G2939A

**Assay Information:**  
 Assay Origin Path: C:\Programme\Agilent\2100 bioanalyzer\2100 expert\assays\RNA\Eukaryote Total RNA Nano Series II.xsy  
 Assay Class: Eukaryote Total RNA Nano  
 Version: 2.6  
 Assay Comments: Total RNA Analysis ng sensitivity (Eukaryote)  
 © Copyright 2003 - 2009 Agilent Technologies, Inc.

**Chip Information:**  
 Chip Lot #:  
 Reagent Kit Lot #:  
 Chip Comments:

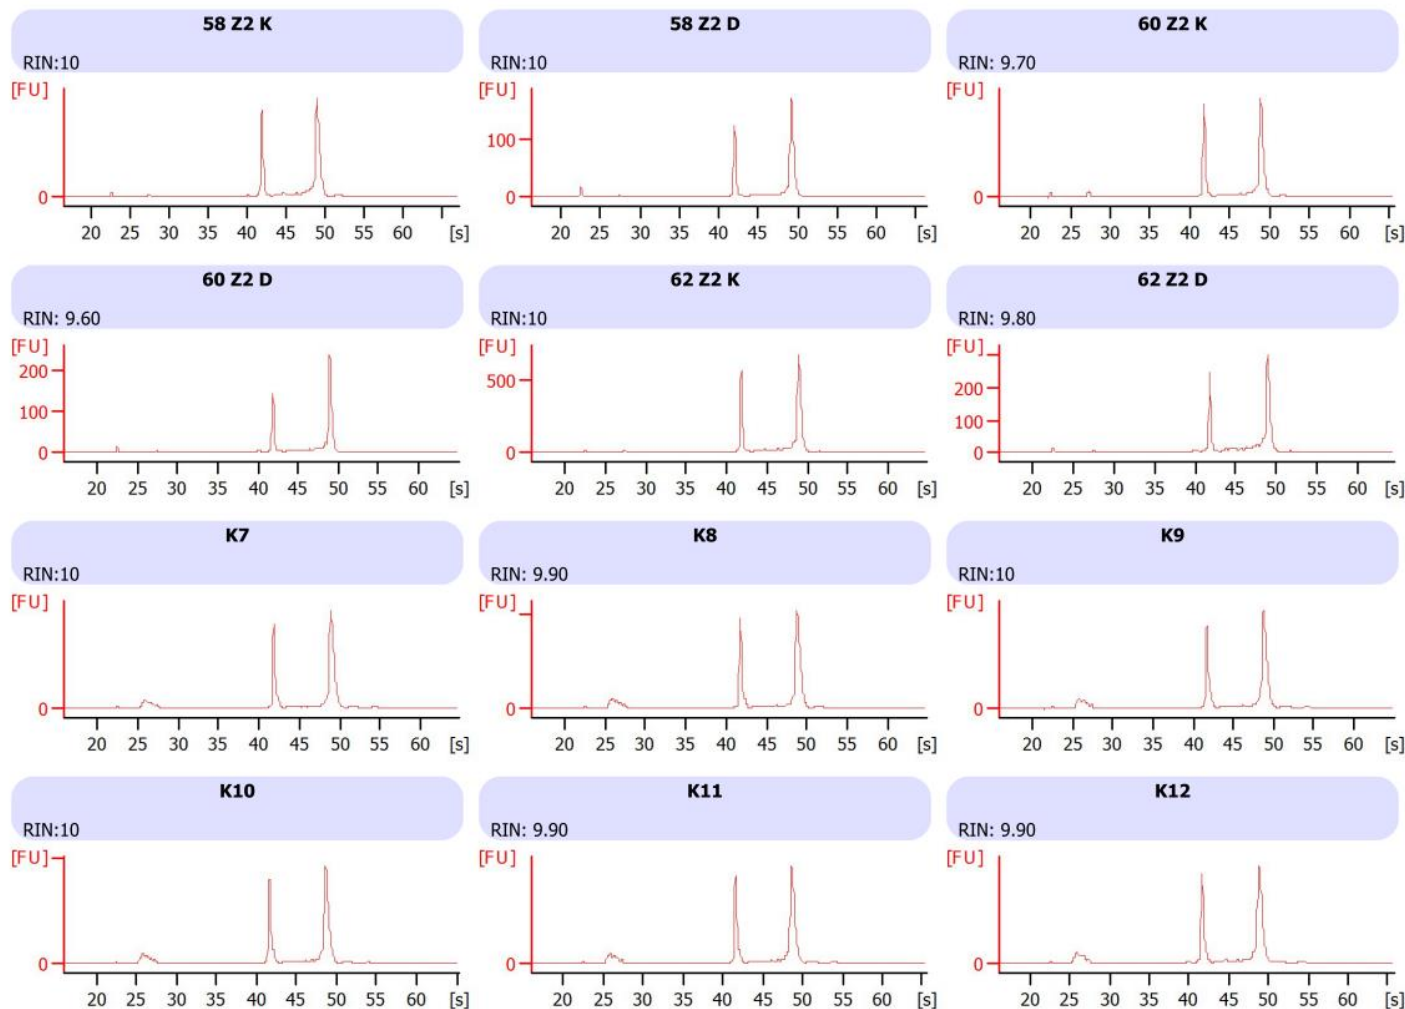

Assay Class: Eukaryote Total RNA Nano  
 Data Path: E:\...Eukaryote Total RNA Nano\_DE72901710\_2017-03-08\_10-01-40.xad

Created: 08.03.2017 10:01:40  
 Modified: 08.03.2017 10:25:31

**Electrophoresis File Run Summary (Chip Summary)**

| Sample Name | Sample Comment | Status | Result Label      | Result Color |
|-------------|----------------|--------|-------------------|--------------|
| 58 Z2 K     |                | ✓      | RIN:10            |              |
| 58 Z2 D     |                | ✓      | RIN:10            |              |
| 60 Z2 K     |                | ✓      | RIN: 9.70         |              |
| 60 Z2 D     |                | ✓      | RIN: 9.60         |              |
| 62 Z2 K     |                | ✓      | RIN:10            |              |
| 62 Z2 D     |                | ✓      | RIN: 9.80         |              |
| K7          |                | ✓      | RIN:10            |              |
| K8          |                | ✓      | RIN: 9.90         |              |
| K9          |                | ✓      | RIN:10            |              |
| K10         |                | ✓      | RIN:10            |              |
| K11         |                | ✓      | RIN: 9.90         |              |
| K12         |                | ✓      | RIN: 9.90         |              |
| Ladder      |                | ✓      | All Other Samples |              |

Chip Lot #

Reagent Kit Lot #

Chip Comments :

Assay Class: Eukaryote Total RNA Nano  
Data Path: E:\...Eukaryote Total RNA Nano\_DE72901710\_2017-03-08\_10-01-40.xad

Created: 08.03.2017 10:01:40  
Modified: 08.03.2017 10:25:31

### Electrophoresis Assay Details

#### General Analysis Settings

Number of Available Sample and Ladder Wells (Max.) : 13  
Minimum Visible Range [s] : 17  
Maximum Visible Range [s] : 70  
Start Analysis Time Range [s] : 19  
End Analysis Time Range [s] : 69  
Ladder Concentration [ng/ $\mu$ l] : 150  
Lower Marker Concentration [ng/ $\mu$ l] : 0  
Upper Marker Concentration [ng/ $\mu$ l] : 0  
Used Lower Marker for Quantitation  
Standard Curve Fit is Logarithmic  
Show Data Aligned to Lower Marker

#### Integrator Settings

Integration Start Time [s] : 19  
Integration End Time [s] : 69  
Slope Threshold : 0,6  
Height Threshold [FU] : 0,5  
Area Threshold : 0,2  
Width Threshold [s] : 0,5  
Baseline Plateau [s] : 6

#### Filter Settings

Filter Width [s] : 0,5  
Polynomial Order : 4

#### Ladder

| Ladder Peak | Size |
|-------------|------|
| 1           | 25   |
| 2           | 200  |
| 3           | 500  |
| 4           | 1000 |
| 5           | 2000 |
| 6           | 4000 |

Assay Class: Eukaryote Total RNA Nano  
 Data Path: E:\...Eukaryote Total RNA Nano\_DE72901710\_2017-03-08\_10-01-40.xad

Created: 08.03.2017 10:01:40  
 Modified: 08.03.2017 10:25:31

**Electropherogram Summary Continued ...**

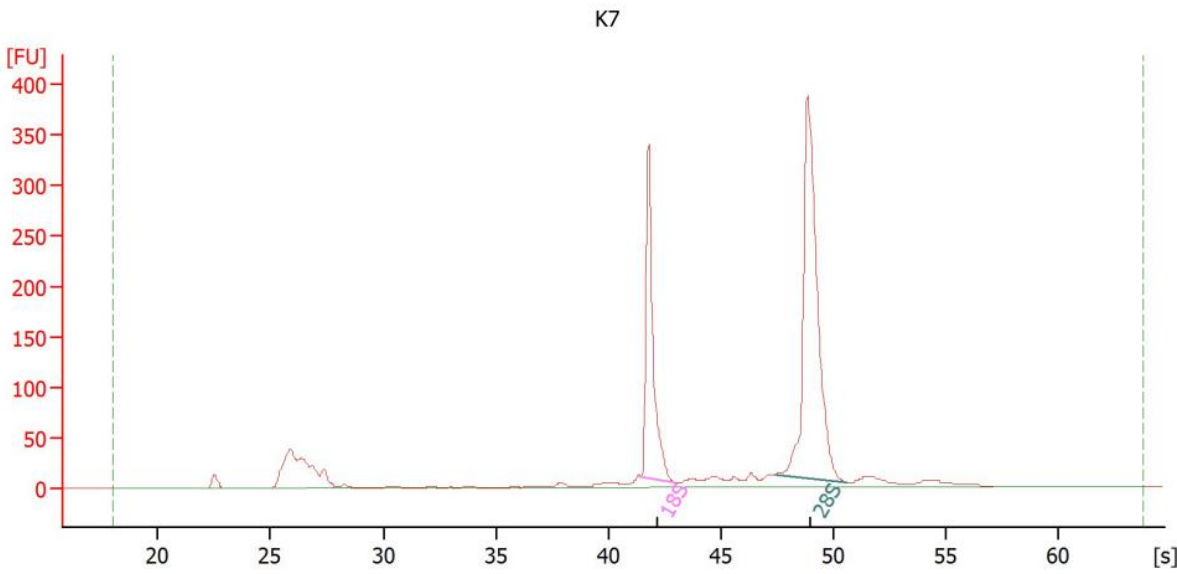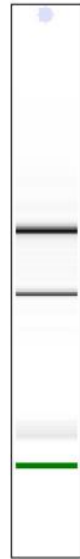

**Overall Results for sample 7 : K7**

|                         |           |                             |                                                                                                                             |
|-------------------------|-----------|-----------------------------|-----------------------------------------------------------------------------------------------------------------------------|
| RNA Area:               | 1.347,6   | RNA Integrity Number (RIN): | 10 (B.02.08)                                                                                                                |
| RNA Concentration:      | 471 ng/µl | Result Flagging Color:      | <span style="background-color: #ccccff; border: 1px solid black; display: inline-block; width: 20px; height: 10px;"></span> |
| rRNA Ratio [28s / 18s]: | 1,8       | Result Flagging Label:      | RIN:10                                                                                                                      |

**Fragment table for sample 7 : K7**

| Name | Start Time [s] | End Time [s] | Area  | % of total Area |
|------|----------------|--------------|-------|-----------------|
| 18S  | 41,44          | 42,97        | 298,3 | 22,1            |
| 28S  | 47,40          | 50,59        | 547,4 | 40,6            |

Assay Class: Eukaryote Total RNA Nano  
 Data Path: E:\...Eukaryote Total RNA Nano\_DE72901710\_2017-03-08\_10-01-40.xad

Created: 08.03.2017 10:01:40  
 Modified: 08.03.2017 10:25:31

**Electropherogram Summary Continued ...**

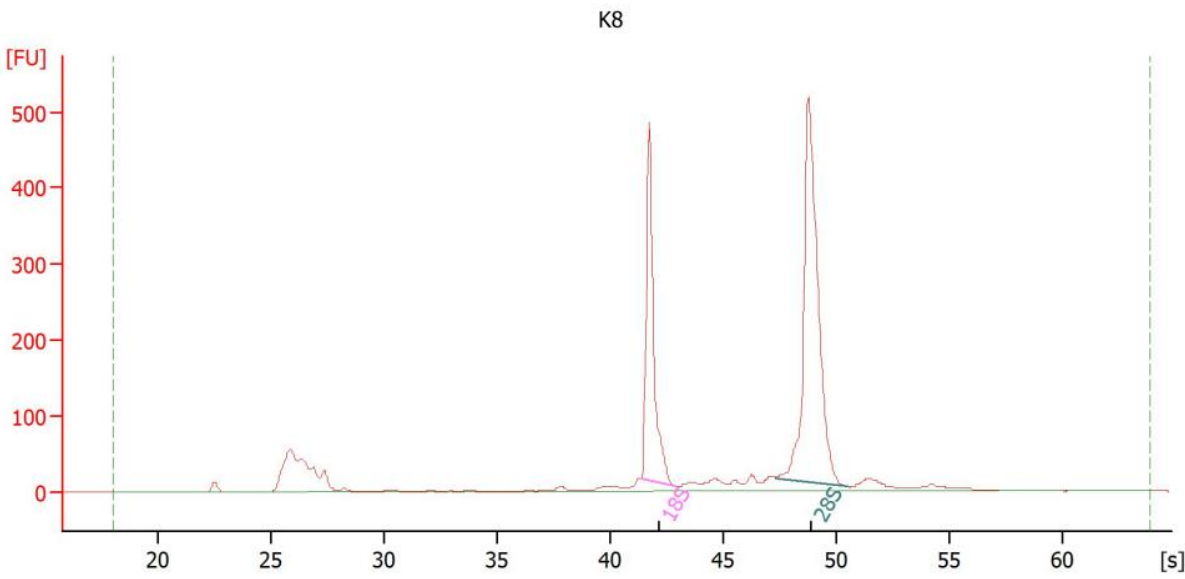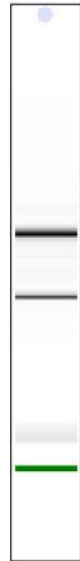

**Overall Results for sample 8 : K8**

|                         |           |                             |                                                                                                                             |
|-------------------------|-----------|-----------------------------|-----------------------------------------------------------------------------------------------------------------------------|
| RNA Area:               | 1.892,6   | RNA Integrity Number (RIN): | 9.9 (B.02.08)                                                                                                               |
| RNA Concentration:      | 661 ng/μl | Result Flagging Color:      | <span style="background-color: #ccccff; border: 1px solid black; display: inline-block; width: 20px; height: 10px;"></span> |
| rRNA Ratio [28s / 18s]: | 1,8       | Result Flagging Label:      | RIN: 9.90                                                                                                                   |

**Fragment table for sample 8 : K8**

| Name | Start Time [s] | End Time [s] | Area  | % of total Area |
|------|----------------|--------------|-------|-----------------|
| 18S  | 41,39          | 42,92        | 424,1 | 22,4            |
| 28S  | 47,31          | 50,51        | 757,6 | 40,0            |



Assay Class: Eukaryote Total RNA Nano  
 Data Path: E:\...Eukaryote Total RNA Nano\_DE72901710\_2017-03-08\_10-01-40.xad

Created: 08.03.2017 10:01:40  
 Modified: 08.03.2017 10:25:31

**Electropherogram Summary Continued ...**

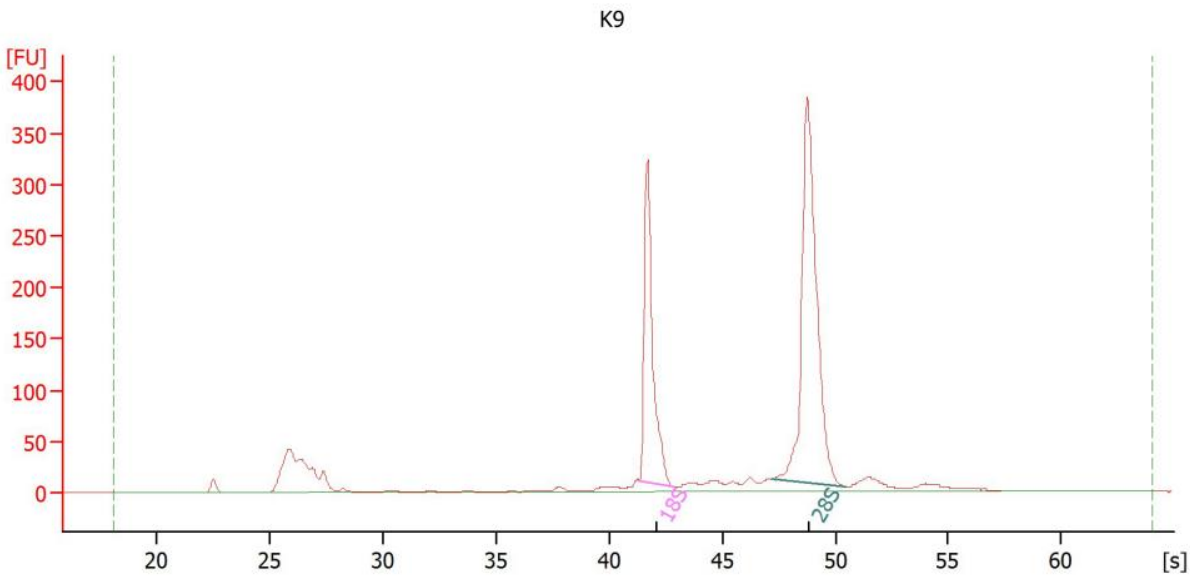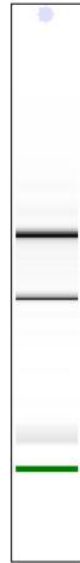

**Overall Results for sample 9 : K9**

|                         |           |                             |                                                                                                                             |
|-------------------------|-----------|-----------------------------|-----------------------------------------------------------------------------------------------------------------------------|
| RNA Area:               | 1.413,9   | RNA Integrity Number (RIN): | 10 (B.02.08)                                                                                                                |
| RNA Concentration:      | 494 ng/μl | Result Flagging Color:      | <span style="background-color: #ccccff; border: 1px solid black; display: inline-block; width: 20px; height: 10px;"></span> |
| rRNA Ratio [28s / 18s]: | 1,8       | Result Flagging Label:      | RIN:10                                                                                                                      |

**Fragment table for sample 9 : K9**

| Name | Start Time [s] | End Time [s] | Area  | % of total Area |
|------|----------------|--------------|-------|-----------------|
| 18S  | 41,34          | 42,87        | 312,2 | 22,1            |
| 28S  | 47,23          | 50,47        | 568,9 | 40,2            |

Assay Class: Eukaryote Total RNA Nano  
 Data Path: E:\...Eukaryote Total RNA Nano\_DE72901710\_2017-03-08\_10-01-40.xad

Created: 08.03.2017 10:01:40  
 Modified: 08.03.2017 10:25:31

**Electropherogram Summary Continued ...**

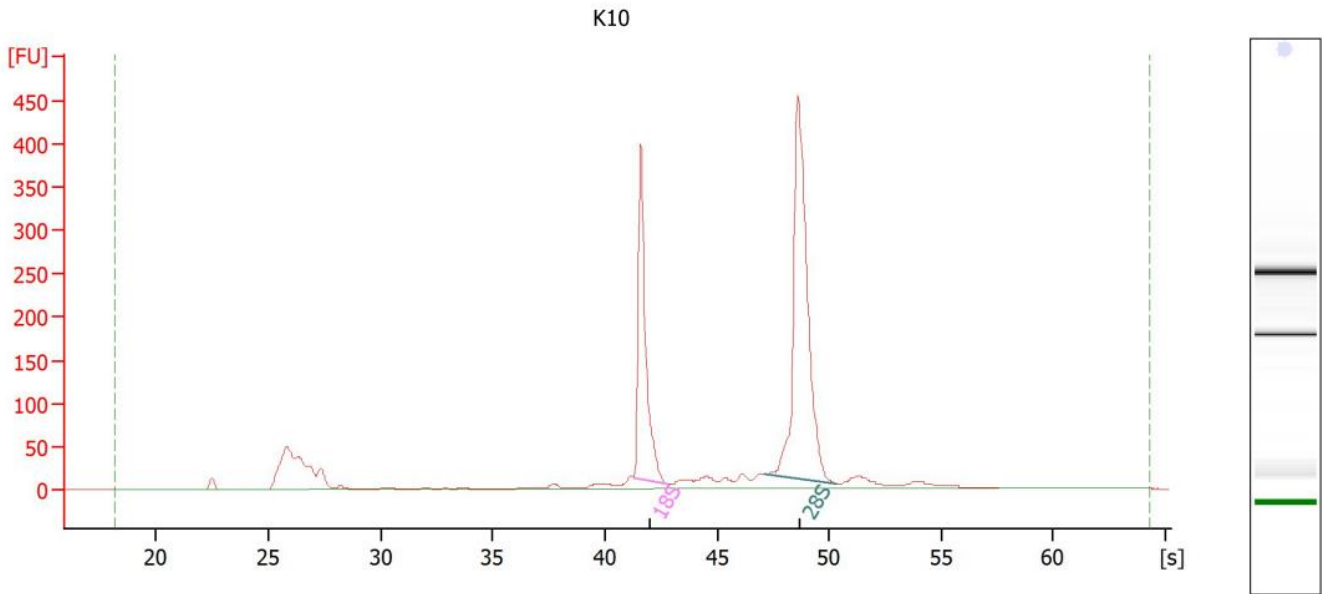

**Overall Results for sample 10 : K10**

|                         |           |                             |                                                                                                                             |
|-------------------------|-----------|-----------------------------|-----------------------------------------------------------------------------------------------------------------------------|
| RNA Area:               | 1.661,9   | RNA Integrity Number (RIN): | 10 (B.02.08)                                                                                                                |
| RNA Concentration:      | 581 ng/μl | Result Flagging Color:      | <span style="background-color: #ccccff; border: 1px solid black; display: inline-block; width: 20px; height: 10px;"></span> |
| rRNA Ratio [28s / 18s]: | 1,8       | Result Flagging Label:      | RIN:10                                                                                                                      |

**Fragment table for sample 10 : K10**

| Name | Start Time [s] | End Time [s] | Area  | % of total Area |
|------|----------------|--------------|-------|-----------------|
| 18S  | 41,27          | 42,76        | 358,9 | 21,6            |
| 28S  | 47,14          | 50,36        | 652,4 | 39,3            |

Assay Class: Eukaryote Total RNA Nano  
 Data Path: E:\...Eukaryote Total RNA Nano\_DE72901710\_2017-03-08\_10-01-40.xad

Created: 08.03.2017 10:01:40  
 Modified: 08.03.2017 10:25:31

**Electropherogram Summary Continued ...**

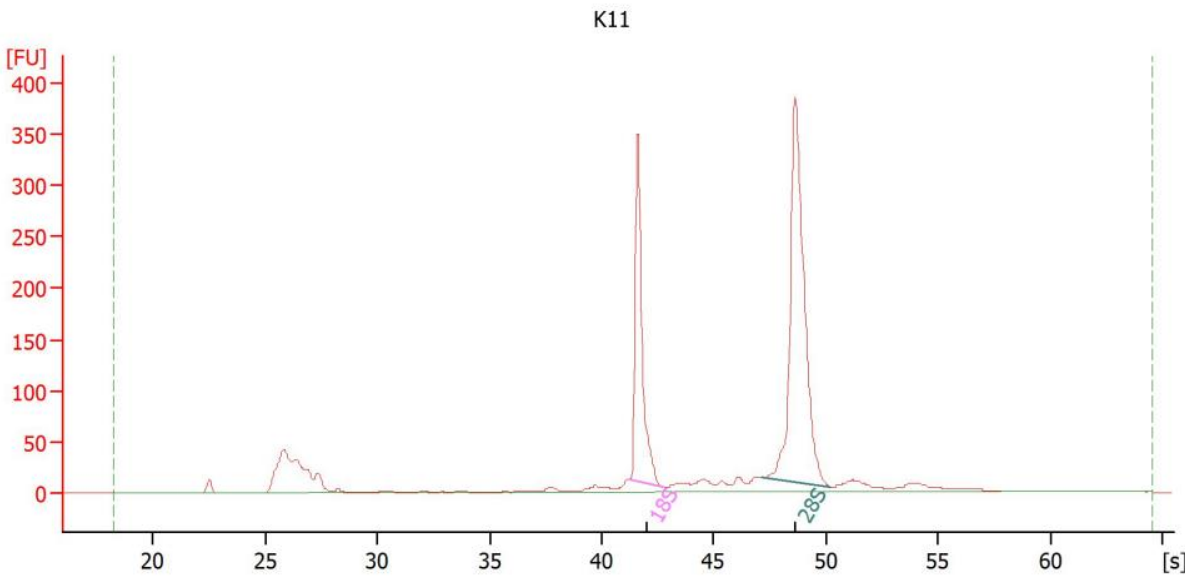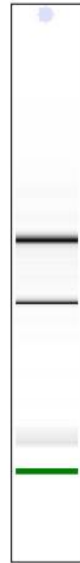

**Overall Results for sample 11 : K11**

|                         |           |                             |                                                                                                                             |
|-------------------------|-----------|-----------------------------|-----------------------------------------------------------------------------------------------------------------------------|
| RNA Area:               | 1.428,2   | RNA Integrity Number (RIN): | 9.9 (B.02.08)                                                                                                               |
| RNA Concentration:      | 499 ng/μl | Result Flagging Color:      | <span style="background-color: #ccccff; border: 1px solid black; display: inline-block; width: 20px; height: 10px;"></span> |
| rRNA Ratio [28s / 18s]: | 1,8       | Result Flagging Label:      | RIN: 9.90                                                                                                                   |

**Fragment table for sample 11 : K11**

| Name | Start Time [s] | End Time [s] | Area  | % of total Area |
|------|----------------|--------------|-------|-----------------|
| 18S  | 41,26          | 42,75        | 306,4 | 21,5            |
| 28S  | 47,15          | 50,19        | 555,1 | 38,9            |

Assay Class: Eukaryote Total RNA Nano  
 Data Path: E:\...Eukaryote Total RNA Nano\_DE72901710\_2017-03-08\_10-01-40.xad

Created: 08.03.2017 10:01:40  
 Modified: 08.03.2017 10:25:31

**Electropherogram Summary Continued ...**

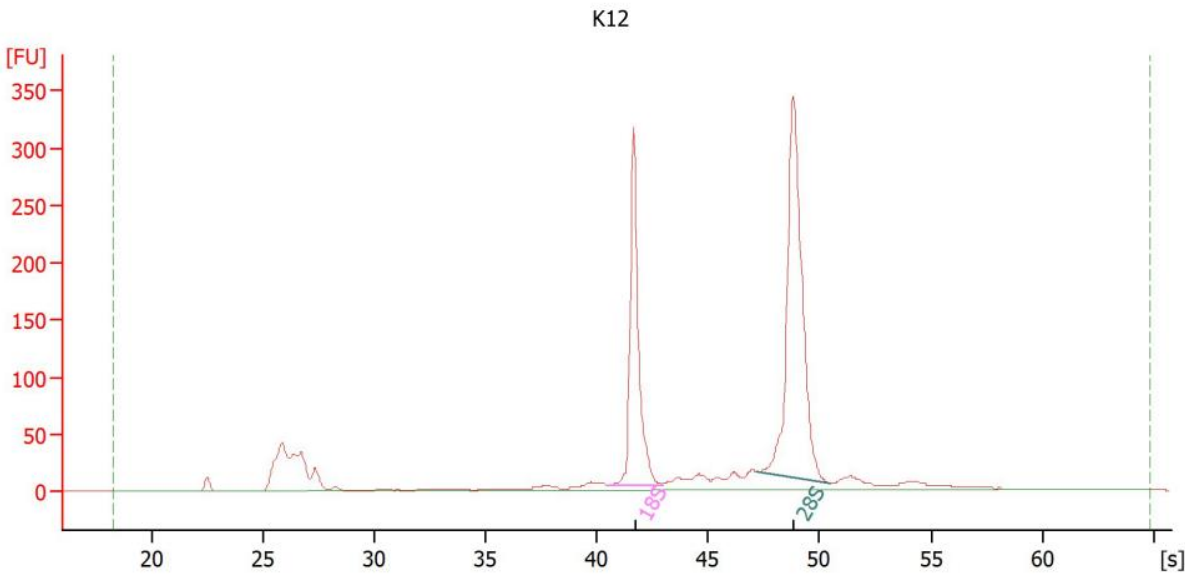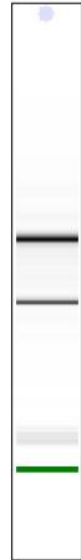

**Overall Results for sample 12 : K12**

|                         |           |                             |                                                                                                                             |
|-------------------------|-----------|-----------------------------|-----------------------------------------------------------------------------------------------------------------------------|
| RNA Area:               | 1.415,8   | RNA Integrity Number (RIN): | 9.9 (B.02.08)                                                                                                               |
| RNA Concentration:      | 495 ng/μl | Result Flagging Color:      | <span style="background-color: #ccccff; border: 1px solid black; display: inline-block; width: 20px; height: 10px;"></span> |
| rRNA Ratio [28s / 18s]: | 1,7       | Result Flagging Label:      | RIN: 9.90                                                                                                                   |

**Fragment table for sample 12 : K12**

| Name | Start Time [s] | End Time [s] | Area  | % of total Area |
|------|----------------|--------------|-------|-----------------|
| 18S  | 40,54          | 42,93        | 318,9 | 22,5            |
| 28S  | 47,21          | 50,50        | 528,1 | 37,3            |

Assay Class: Eukaryote Total RNA Nano  
 Data Path: E:\...Eukaryote Total RNA Nano\_DE72901710\_2017-03-08\_10-01-40.xad

Created: 08.03.2017 10:01:40  
 Modified: 08.03.2017 10:25:31

**Gel Image**

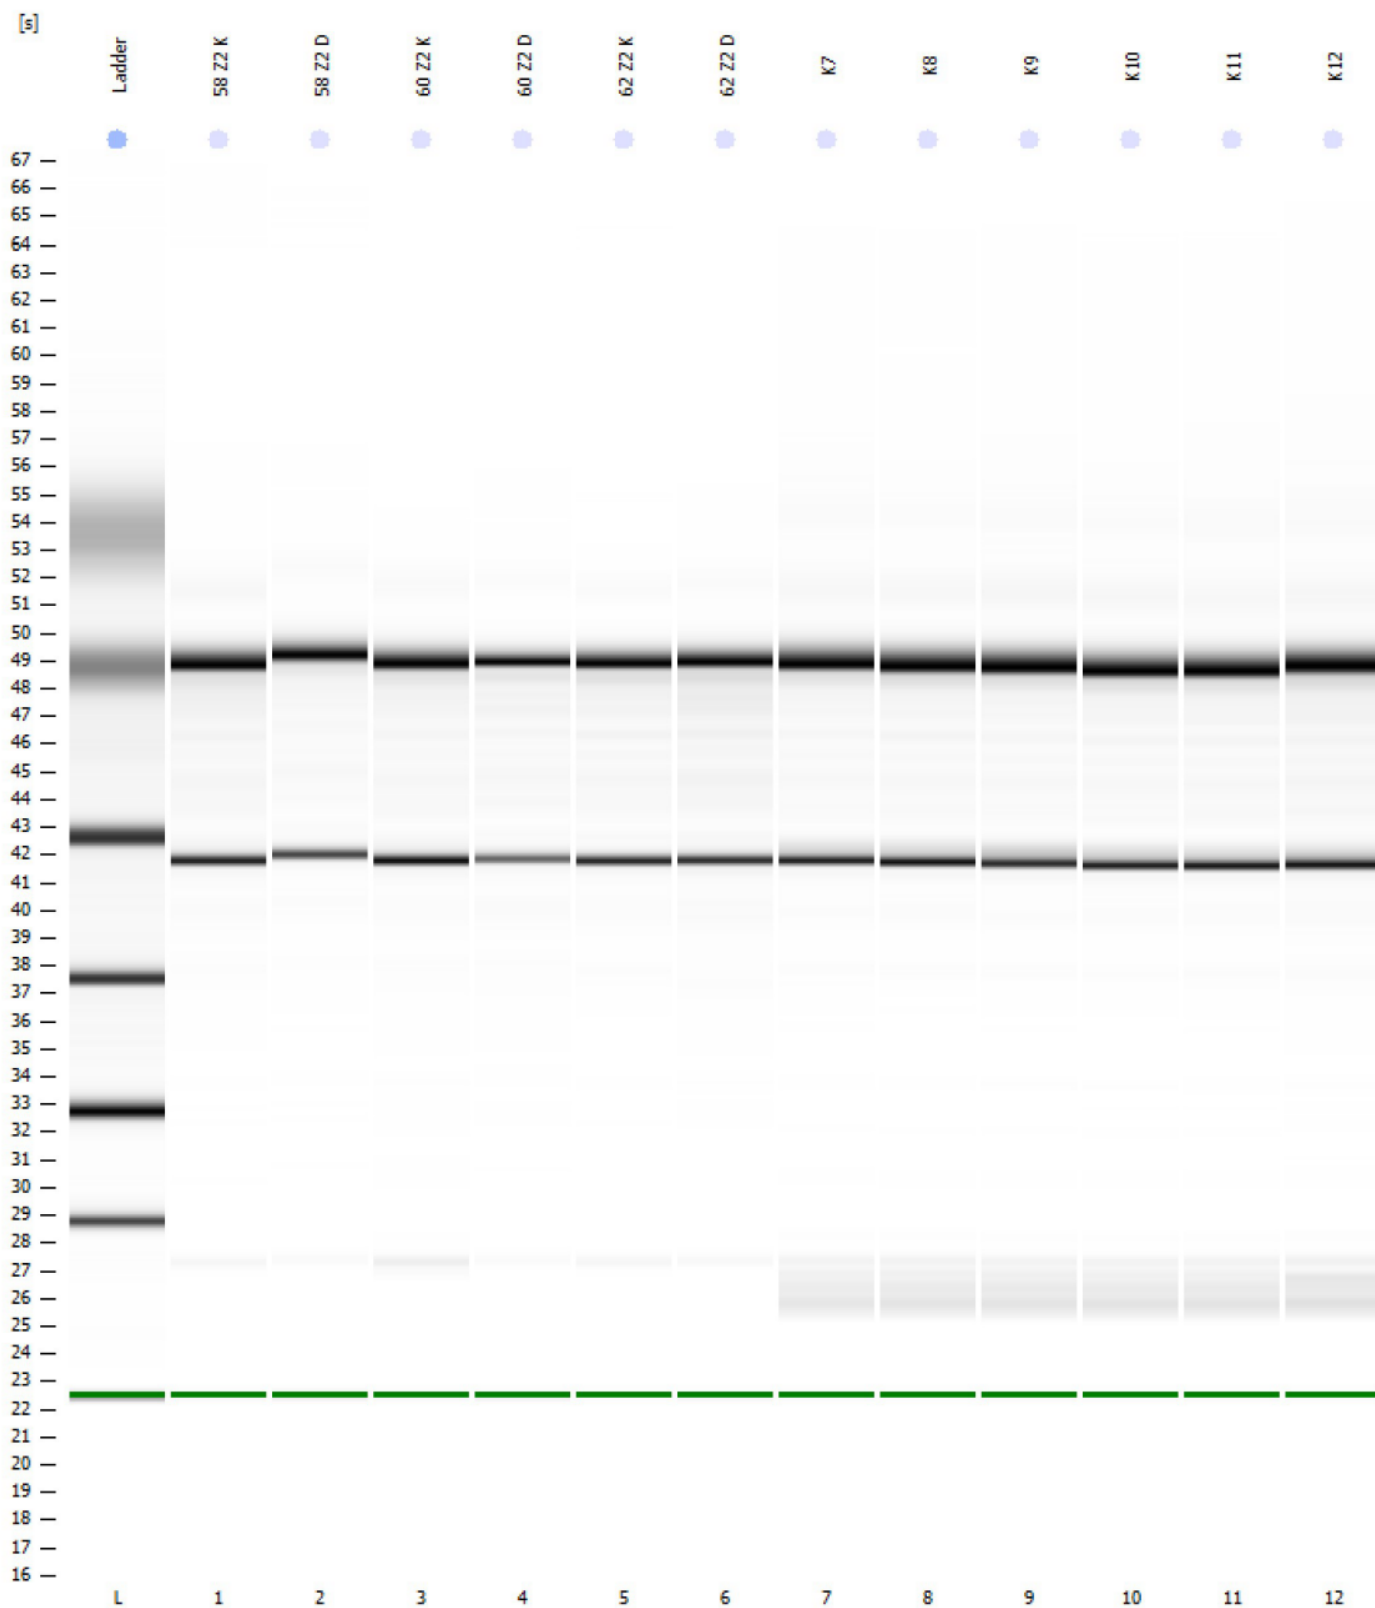

Assay Class: Eukaryote Total RNA Nano  
 Data Path: E:\...Eukaryote Total RNA Nano\_DE72901710\_2017-03-08\_10-30-01.xad

Created: 08.03.2017 10:30:01  
 Modified: 08.03.2017 10:53:07

**Electrophoresis File Run Summary**

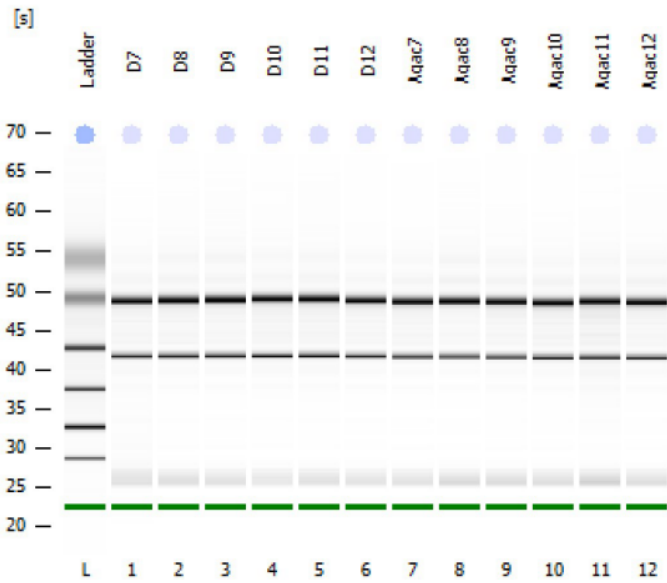

Instrument Information:

Instrument Name: DE72901710      Firmware: C.01.069  
 Serial#: DE72901710      Type: G2939A

Assay Information:

Assay Origin Path: C:\Programme\Agilent\2100 bioanalyzer\2100 expert\assays\RNA\Eukaryote Total RNA Nano Series II.xsy  
 Assay Class: Eukaryote Total RNA Nano  
 Version: 2.6  
 Assay Comments: Total RNA Analysis ng sensitivity (Eukaryote)  
 © Copyright 2003 - 2009 Agilent Technologies, Inc.

Chip Information:

Chip Lot #:  
 Reagent Kit Lot #:  
 Chip Comments:

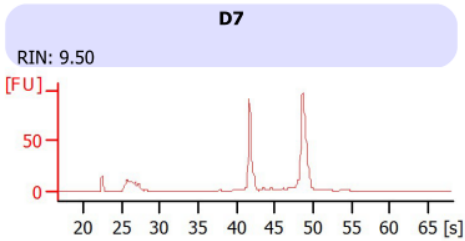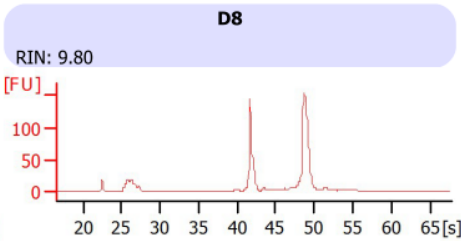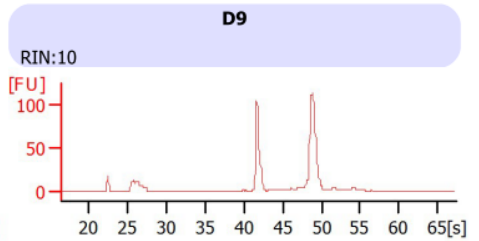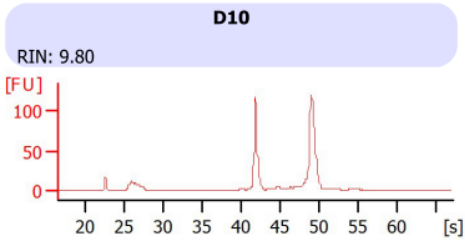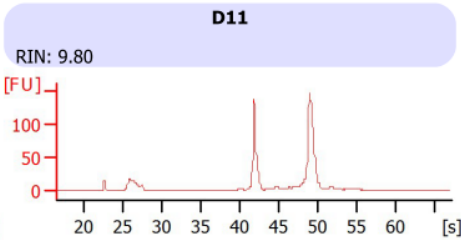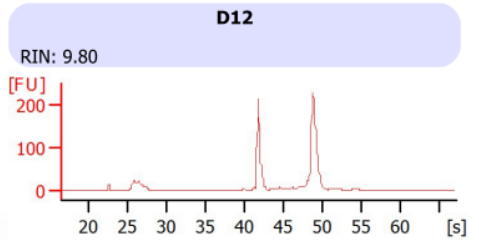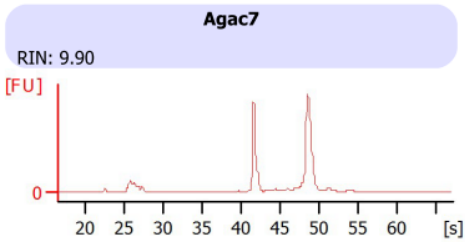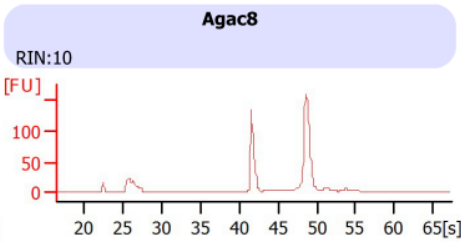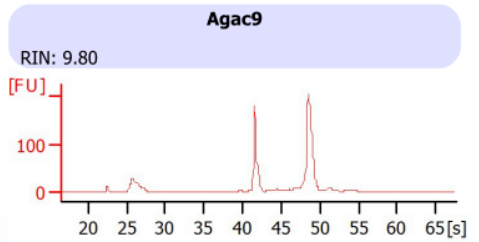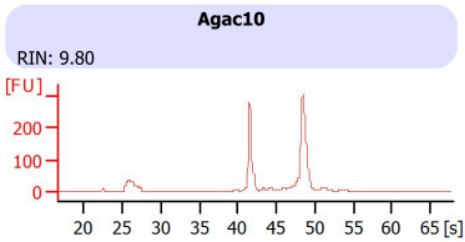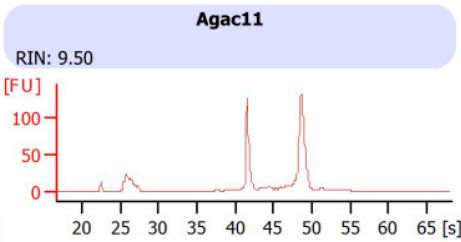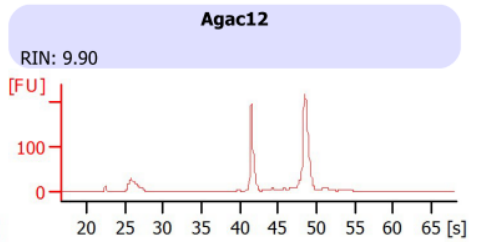

Assay Class: Eukaryote Total RNA Nano  
 Data Path: E:\...Eukaryote Total RNA Nano\_DE72901710\_2017-03-08\_10-30-01.xad

Created: 08.03.2017 10:30:01  
 Modified: 08.03.2017 10:53:07

**Electrophoresis File Run Summary (Chip Summary)**

| Sample Name | Sample Comment | Status | Result Label      | Result Color |
|-------------|----------------|--------|-------------------|--------------|
| D7          |                | ✓      | RIN: 9.50         |              |
| D8          |                | ✓      | RIN: 9.80         |              |
| D9          |                | ✓      | RIN:10            |              |
| D10         |                | ✓      | RIN: 9.80         |              |
| D11         |                | ✓      | RIN: 9.80         |              |
| D12         |                | ✓      | RIN: 9.80         |              |
| Agac7       |                | ✓      | RIN: 9.90         |              |
| Agac8       |                | ✓      | RIN:10            |              |
| Agac9       |                | ✓      | RIN: 9.80         |              |
| Agac10      |                | ✓      | RIN: 9.80         |              |
| Agac11      |                | ✓      | RIN: 9.50         |              |
| Agac12      |                | ✓      | RIN: 9.90         |              |
| Ladder      |                | ✓      | All Other Samples |              |

Chip Lot #

Reagent Kit Lot #

Chip Comments :

Assay Class: Eukaryote Total RNA Nano  
Data Path: E:\...Eukaryote Total RNA Nano\_DE72901710\_2017-03-08\_10-30-01.xad

Created: 08.03.2017 10:30:01  
Modified: 08.03.2017 10:53:07

### Electrophoresis Assay Details

#### General Analysis Settings

Number of Available Sample and Ladder Wells (Max.) : 13  
Minimum Visible Range [s] : 17  
Maximum Visible Range [s] : 70  
Start Analysis Time Range [s] : 19  
End Analysis Time Range [s] : 69  
Ladder Concentration [ng/μl] : 150  
Lower Marker Concentration [ng/μl] : 0  
Upper Marker Concentration [ng/μl] : 0  
Used Lower Marker for Quantitation  
Standard Curve Fit is Logarithmic  
Show Data Aligned to Lower Marker

#### Integrator Settings

Integration Start Time [s] : 19  
Integration End Time [s] : 69  
Slope Threshold : 0,6  
Height Threshold [FU] : 0,5  
Area Threshold : 0,2  
Width Threshold [s] : 0,5  
Baseline Plateau [s] : 6

#### Filter Settings

Filter Width [s] : 0,5  
Polynomial Order : 4

#### Ladder

| Ladder Peak | Size |
|-------------|------|
| 1           | 25   |
| 2           | 200  |
| 3           | 500  |
| 4           | 1000 |
| 5           | 2000 |
| 6           | 4000 |



Assay Class: Eukaryote Total RNA Nano  
 Data Path: E:\...Eukaryote Total RNA Nano\_DE72901710\_2017-03-08\_10-30-01.xad

Created: 08.03.2017 10:30:01  
 Modified: 08.03.2017 10:53:07

**Electropherogram Summary**

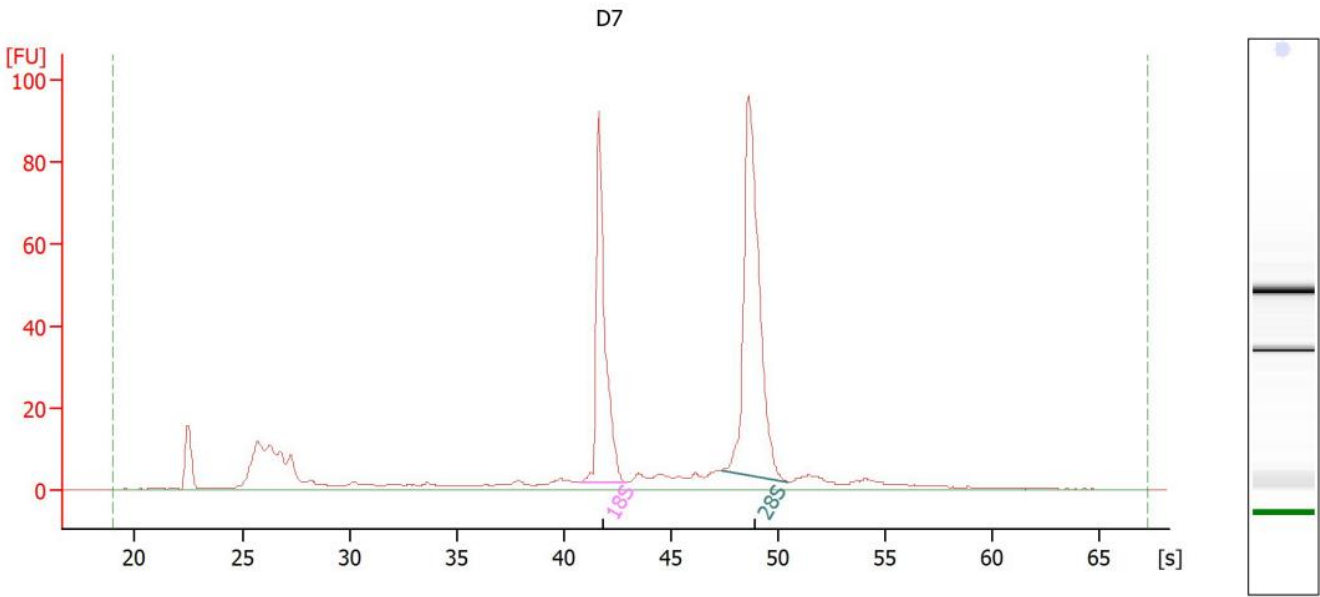

**Overall Results for sample 1 : D7**

|                         |           |                             |                                                                                                                             |
|-------------------------|-----------|-----------------------------|-----------------------------------------------------------------------------------------------------------------------------|
| RNA Area:               | 479,7     | RNA Integrity Number (RIN): | 9.5 (B.02.08)                                                                                                               |
| RNA Concentration:      | 201 ng/μl | Result Flagging Color:      | <span style="background-color: #ccccff; border: 1px solid black; display: inline-block; width: 20px; height: 10px;"></span> |
| rRNA Ratio [28s / 18s]: | 1,6       | Result Flagging Label:      | RIN: 9.50                                                                                                                   |

**Fragment table for sample 1 : D7**

| Name | Start Time [s] | End Time [s] | Area  | % of total Area |
|------|----------------|--------------|-------|-----------------|
| 18S  | 40,71          | 42,91        | 97,1  | 20,2            |
| 28S  | 47,39          | 50,41        | 156,1 | 32,5            |

Assay Class: Eukaryote Total RNA Nano  
 Data Path: E:\...Eukaryote Total RNA Nano\_DE72901710\_2017-03-08\_10-30-01.xad

Created: 08.03.2017 10:30:01  
 Modified: 08.03.2017 10:53:07

**Electropherogram Summary Continued ...**

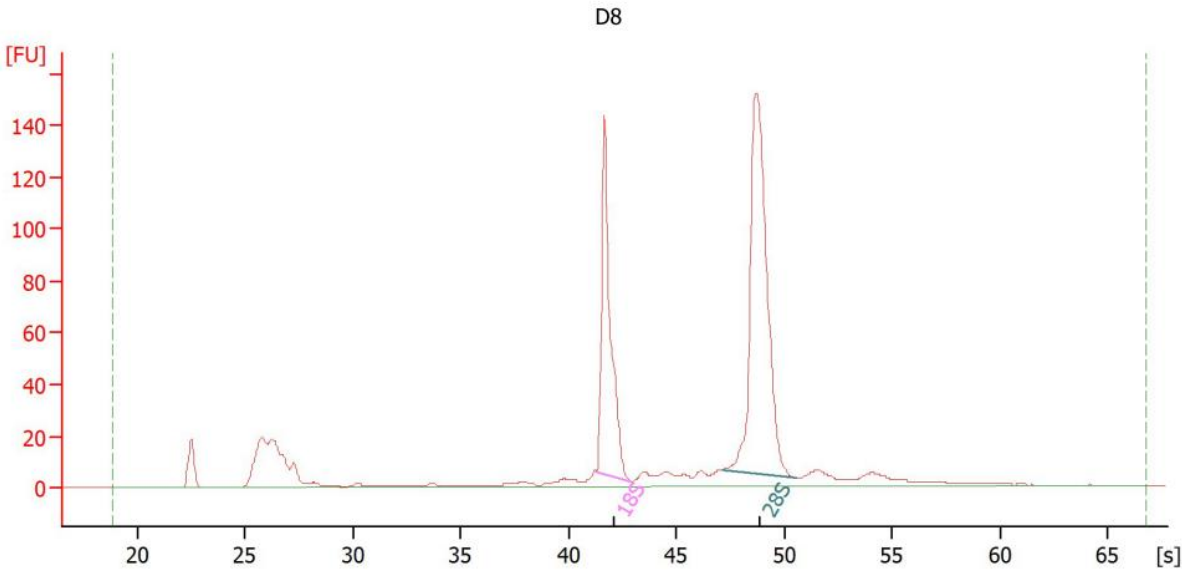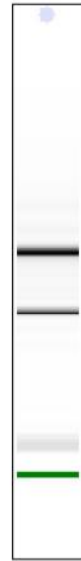

**Overall Results for sample 2 : D8**

|                         |           |                             |                                                                                                                             |
|-------------------------|-----------|-----------------------------|-----------------------------------------------------------------------------------------------------------------------------|
| RNA Area:               | 718,9     | RNA Integrity Number (RIN): | 9.8 (B.02.08)                                                                                                               |
| RNA Concentration:      | 302 ng/μl | Result Flagging Color:      | <span style="background-color: #ccccff; border: 1px solid black; display: inline-block; width: 20px; height: 10px;"></span> |
| rRNA Ratio [28s / 18s]: | 1,7       | Result Flagging Label:      | RIN: 9.80                                                                                                                   |

**Fragment table for sample 2 : D8**

| Name | Start Time [s] | End Time [s] | Area  | % of total Area |
|------|----------------|--------------|-------|-----------------|
| 18S  | 41,32          | 42,92        | 153,6 | 21,4            |
| 28S  | 47,13          | 50,61        | 267,8 | 37,2            |

Assay Class: Eukaryote Total RNA Nano  
 Data Path: E:\...Eukaryote Total RNA Nano\_DE72901710\_2017-03-08\_10-30-01.xad

Created: 08.03.2017 10:30:01  
 Modified: 08.03.2017 10:53:07

**Electropherogram Summary Continued ...**

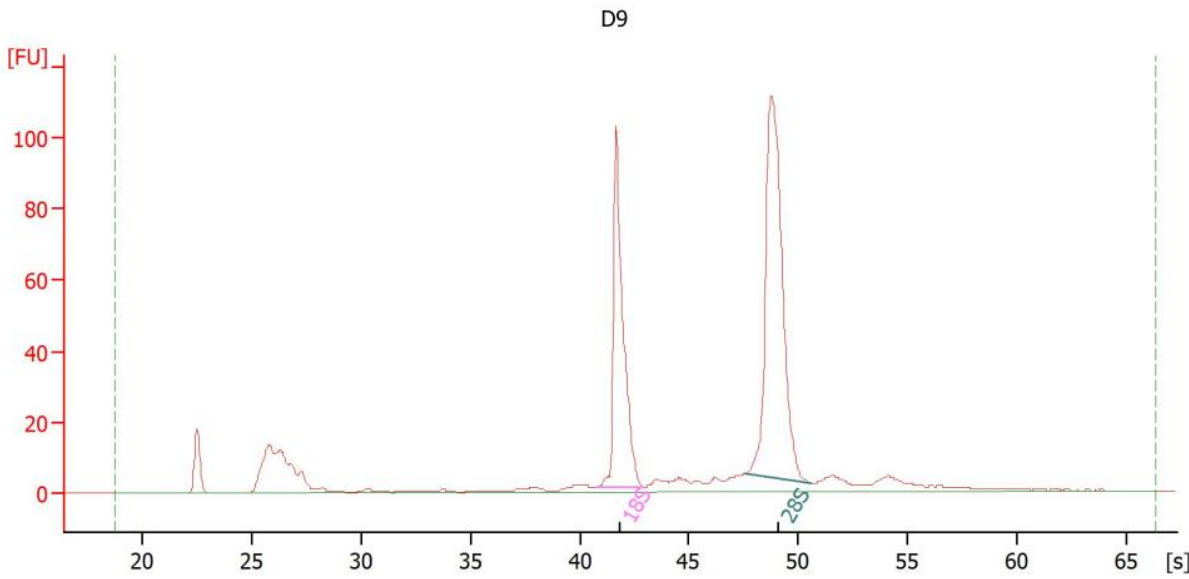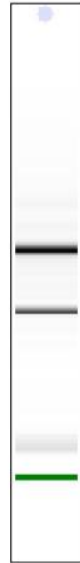

**Overall Results for sample 3 : D9**

|                         |           |                             |                                                                                                                             |
|-------------------------|-----------|-----------------------------|-----------------------------------------------------------------------------------------------------------------------------|
| RNA Area:               | 520,9     | RNA Integrity Number (RIN): | 10 (B.02.08)                                                                                                                |
| RNA Concentration:      | 219 ng/μl | Result Flagging Color:      | <span style="background-color: #ccccff; border: 1px solid black; display: inline-block; width: 20px; height: 10px;"></span> |
| rRNA Ratio [28s / 18s]: | 1,6       | Result Flagging Label:      | RIN:10                                                                                                                      |

**Fragment table for sample 3 : D9**

| Name | Start Time [s] | End Time [s] | Area  | % of total Area |
|------|----------------|--------------|-------|-----------------|
| 18S  | 40,72          | 42,93        | 120,5 | 23,1            |
| 28S  | 47,60          | 50,58        | 196,5 | 37,7            |

Assay Class: Eukaryote Total RNA Nano  
Data Path: E:\...Eukaryote Total RNA Nano\_DE72901710\_2017-03-08\_10-30-01.xad

Created: 08.03.2017 10:30:01  
Modified: 08.03.2017 10:53:07

**Electropherogram Summary Continued ...**

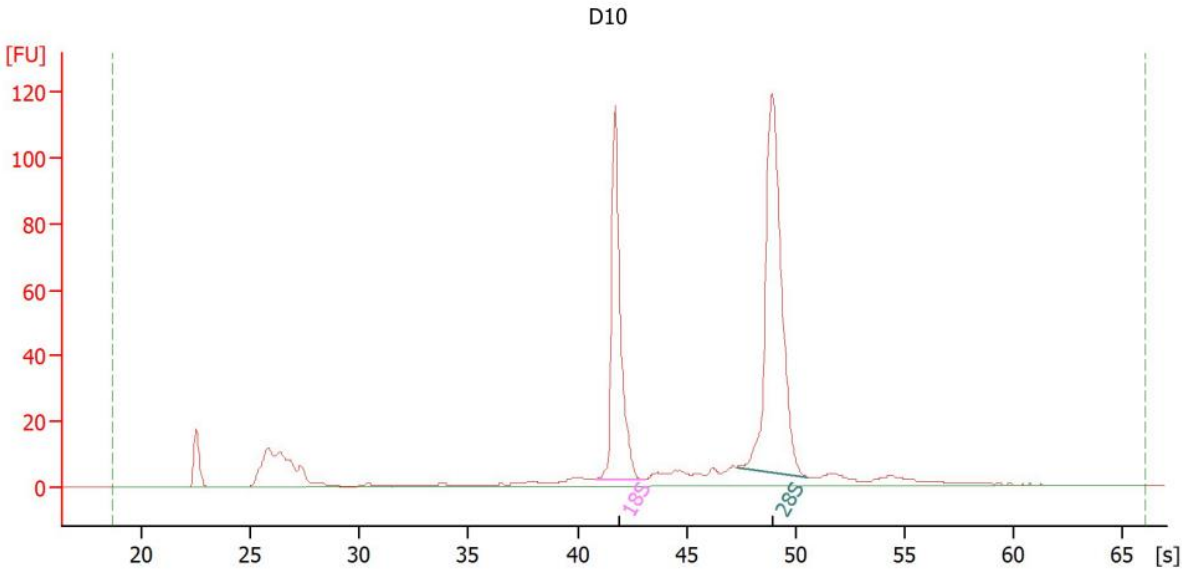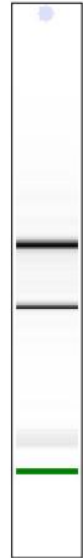

**Overall Results for sample 4 : D10**

|                         |           |                             |                                                                                                                             |
|-------------------------|-----------|-----------------------------|-----------------------------------------------------------------------------------------------------------------------------|
| RNA Area:               | 534,3     | RNA Integrity Number (RIN): | 9.8 (B.02.08)                                                                                                               |
| RNA Concentration:      | 224 ng/µl | Result Flagging Color:      | <span style="background-color: #ccccff; border: 1px solid black; display: inline-block; width: 20px; height: 10px;"></span> |
| rRNA Ratio [28s / 18s]: | 1,6       | Result Flagging Label:      | RIN: 9.80                                                                                                                   |

**Fragment table for sample 4 : D10**

| Name | Start Time [s] | End Time [s] | Area  | % of total Area |
|------|----------------|--------------|-------|-----------------|
| 18S  | 40,84          | 43,04        | 122,9 | 23,0            |
| 28S  | 47,35          | 50,60        | 197,5 | 37,0            |

Assay Class: Eukaryote Total RNA Nano  
 Data Path: E:\...Eukaryote Total RNA Nano\_DE72901710\_2017-03-08\_10-30-01.xad

Created: 08.03.2017 10:30:01  
 Modified: 08.03.2017 10:53:07

**Electropherogram Summary Continued ...**

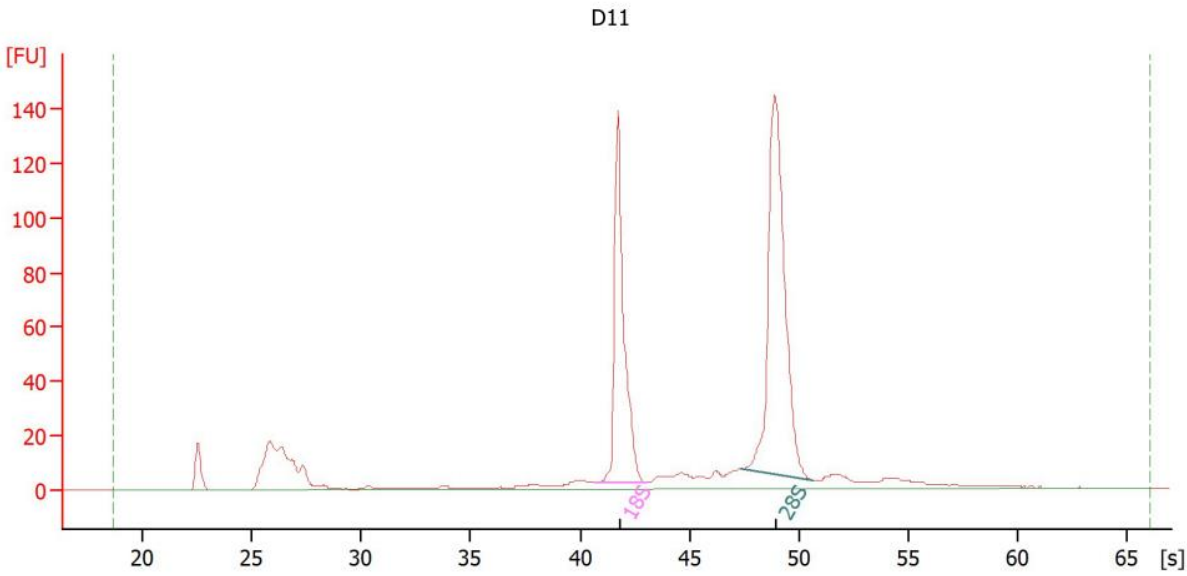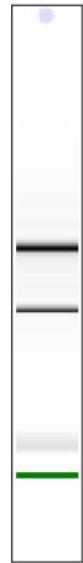

**Overall Results for sample 5 : D11**

|                         |           |                             |                                                                                                                             |
|-------------------------|-----------|-----------------------------|-----------------------------------------------------------------------------------------------------------------------------|
| RNA Area:               | 687,2     | RNA Integrity Number (RIN): | 9.8 (B.02.08)                                                                                                               |
| RNA Concentration:      | 289 ng/µl | Result Flagging Color:      | <span style="background-color: #ccccff; border: 1px solid black; display: inline-block; width: 20px; height: 10px;"></span> |
| rRNA Ratio [28s / 18s]: | 1,6       | Result Flagging Label:      | RIN: 9.80                                                                                                                   |

**Fragment table for sample 5 : D11**

| Name | Start Time [s] | End Time [s] | Area  | % of total Area |
|------|----------------|--------------|-------|-----------------|
| 18S  | 40,69          | 43,09        | 156,2 | 22,7            |
| 28S  | 47,39          | 50,65        | 247,1 | 36,0            |

Assay Class: Eukaryote Total RNA Nano  
 Data Path: E:\...Eukaryote Total RNA Nano\_DE72901710\_2017-03-08\_10-30-01.xad

Created: 08.03.2017 10:30:01  
 Modified: 08.03.2017 10:53:07

**Electropherogram Summary Continued ...**

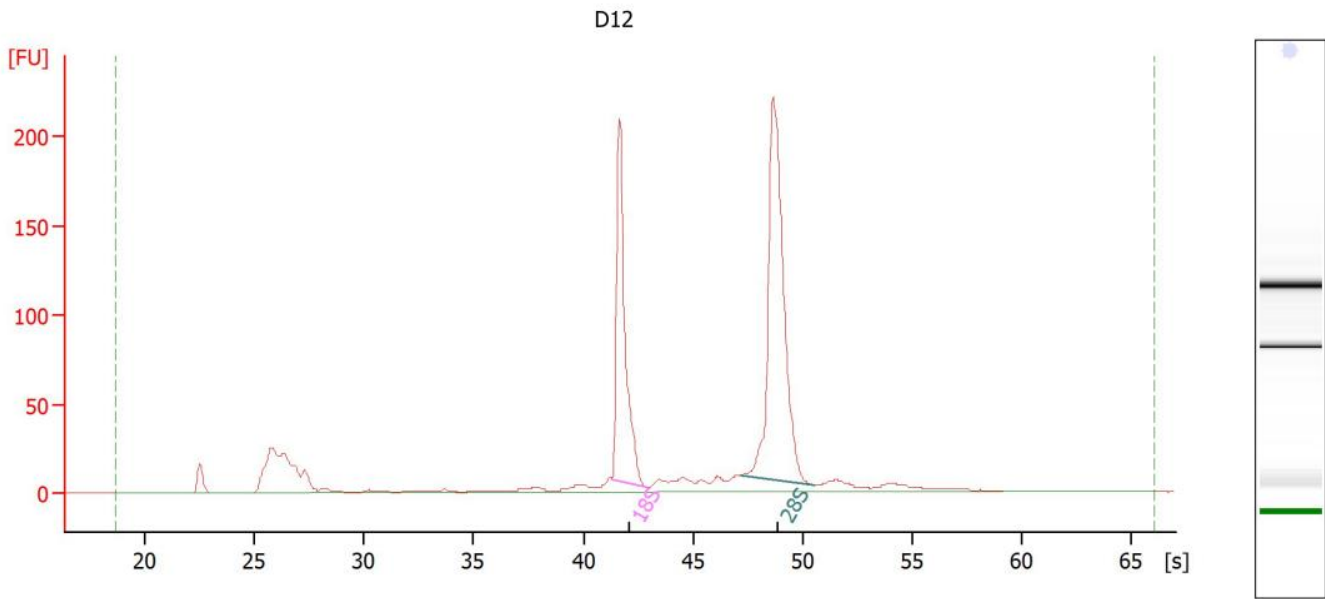

**Overall Results for sample 6 : D12**

|                         |           |                             |                                                                                                                             |
|-------------------------|-----------|-----------------------------|-----------------------------------------------------------------------------------------------------------------------------|
| RNA Area:               | 942,6     | RNA Integrity Number (RIN): | 9.8 (B.02.08)                                                                                                               |
| RNA Concentration:      | 396 ng/μl | Result Flagging Color:      | <span style="background-color: #ccccff; border: 1px solid black; display: inline-block; width: 20px; height: 10px;"></span> |
| rRNA Ratio [28s / 18s]: | 1,7       | Result Flagging Label:      | RIN: 9.80                                                                                                                   |

**Fragment table for sample 6 : D12**

| Name | Start Time [s] | End Time [s] | Area  | % of total Area |
|------|----------------|--------------|-------|-----------------|
| 18S  | 41,31          | 42,89        | 207,1 | 22,0            |
| 28S  | 47,15          | 50,55        | 357,4 | 37,9            |

Assay Class: Eukaryote Total RNA Nano  
 Data Path: E:\...Eukaryote Total RNA Nano\_DE72901710\_2017-03-08\_10-30-01.xad

Created: 08.03.2017 10:30:01  
 Modified: 08.03.2017 10:53:07

**Electropherogram Summary Continued ...**

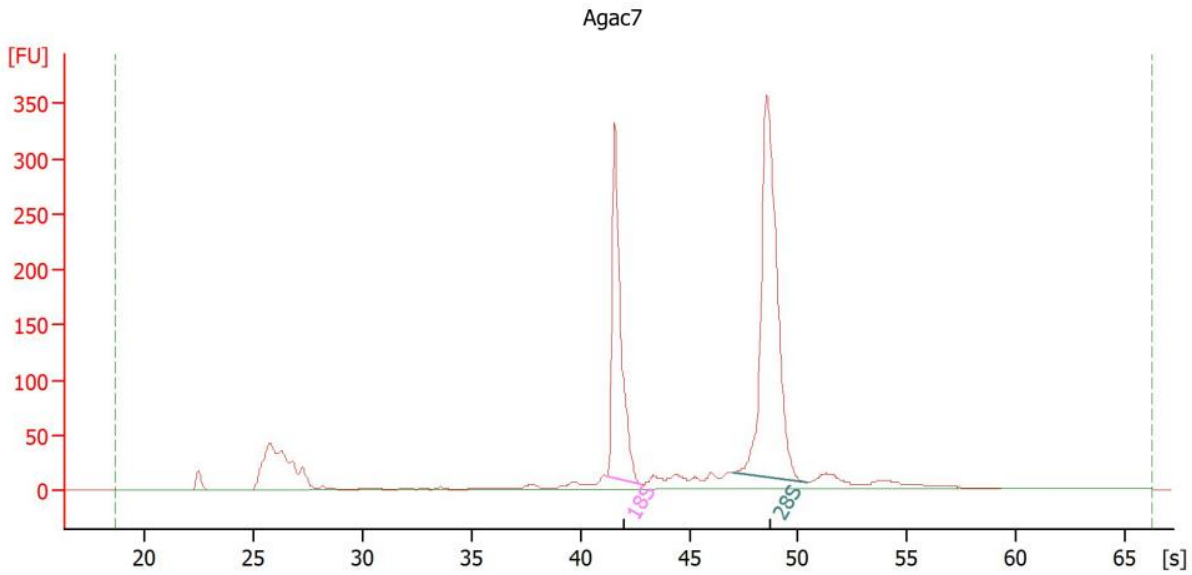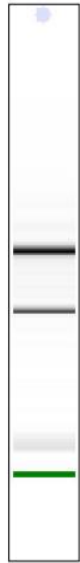

**Overall Results for sample 7 : Agac7**

|                         |           |                             |                                                                                                                             |
|-------------------------|-----------|-----------------------------|-----------------------------------------------------------------------------------------------------------------------------|
| RNA Area:               | 1.565,2   | RNA Integrity Number (RIN): | 9.9 (B.02.08)                                                                                                               |
| RNA Concentration:      | 657 ng/µl | Result Flagging Color:      | <span style="background-color: #ccccff; border: 1px solid black; display: inline-block; width: 20px; height: 10px;"></span> |
| rRNA Ratio [28s / 18s]: | 1,7       | Result Flagging Label:      | RIN: 9.90                                                                                                                   |

**Fragment table for sample 7 : Agac7**

| Name | Start Time [s] | End Time [s] | Area  | % of total Area |
|------|----------------|--------------|-------|-----------------|
| 18S  | 41,26          | 42,79        | 341,8 | 21,8            |
| 28S  | 47,01          | 50,37        | 595,8 | 38,1            |

Assay Class: Eukaryote Total RNA Nano  
 Data Path: E:\...Eukaryote Total RNA Nano\_DE72901710\_2017-03-08\_10-30-01.xad

Created: 08.03.2017 10:30:01  
 Modified: 08.03.2017 10:53:07

**Electropherogram Summary Continued ...**

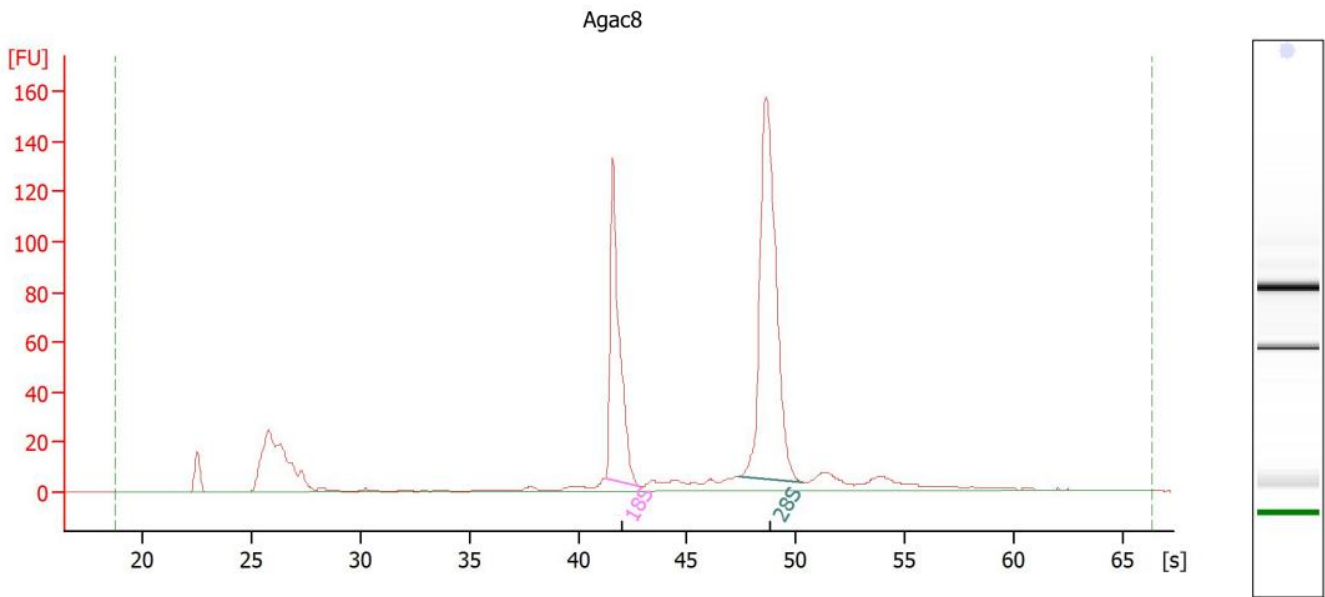

**Overall Results for sample 8 : Agac8**

|                         |           |                             |                                                                                                                             |
|-------------------------|-----------|-----------------------------|-----------------------------------------------------------------------------------------------------------------------------|
| RNA Area:               | 713,4     | RNA Integrity Number (RIN): | 10 (B.02.08)                                                                                                                |
| RNA Concentration:      | 300 ng/μl | Result Flagging Color:      | <span style="background-color: #ccccff; border: 1px solid black; display: inline-block; width: 20px; height: 10px;"></span> |
| rRNA Ratio [28s / 18s]: | 1,8       | Result Flagging Label:      | RIN:10                                                                                                                      |

**Fragment table for sample 8 : Agac8**

| Name | Start Time [s] | End Time [s] | Area  | % of total Area |
|------|----------------|--------------|-------|-----------------|
| 18S  | 41,25          | 42,84        | 147,8 | 20,7            |
| 28S  | 47,36          | 50,34        | 267,2 | 37,5            |



Assay Class: Eukaryote Total RNA Nano  
 Data Path: E:\...Eukaryote Total RNA Nano\_DE72901710\_2017-03-08\_10-30-01.xad

Created: 08.03.2017 10:30:01  
 Modified: 08.03.2017 10:53:07

**Electropherogram Summary Continued ...**

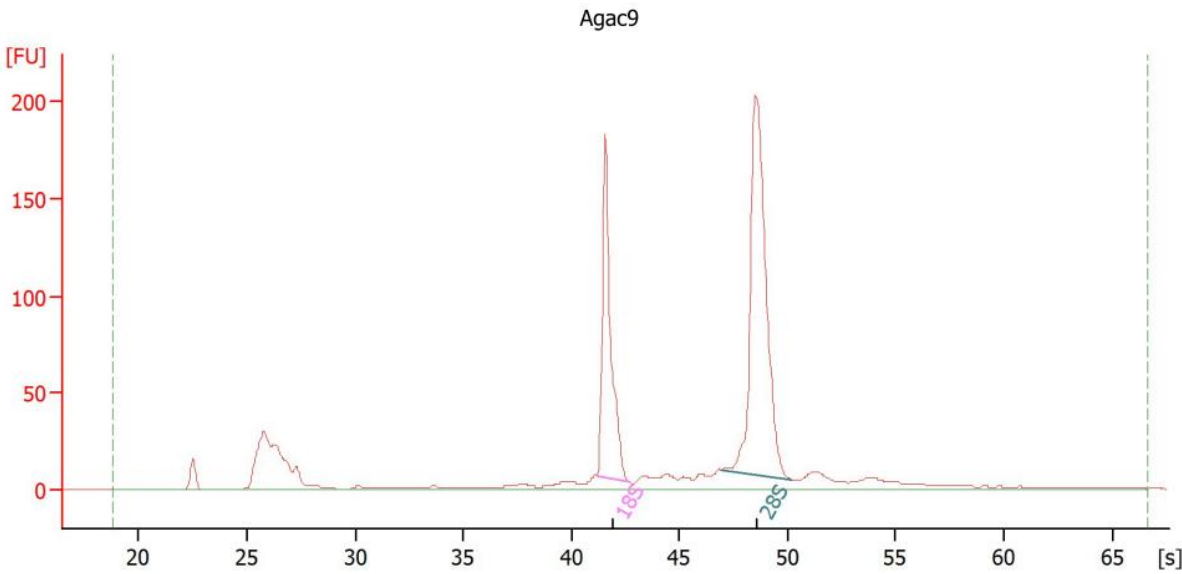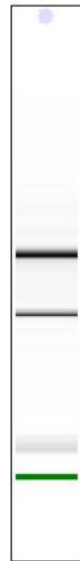

**Overall Results for sample 9 : Agac9**

|                         |           |                             |                                                                                                                             |
|-------------------------|-----------|-----------------------------|-----------------------------------------------------------------------------------------------------------------------------|
| RNA Area:               | 944,4     | RNA Integrity Number (RIN): | 9.8 (B.02.08)                                                                                                               |
| RNA Concentration:      | 397 ng/µl | Result Flagging Color:      | <span style="background-color: #ccccff; border: 1px solid black; display: inline-block; width: 20px; height: 10px;"></span> |
| rRNA Ratio [28s / 18s]: | 1,8       | Result Flagging Label:      | RIN: 9.80                                                                                                                   |

**Fragment table for sample 9 : Agac9**

| Name | Start Time [s] | End Time [s] | Area  | % of total Area |
|------|----------------|--------------|-------|-----------------|
| 18S  | 41,23          | 42,73        | 186,9 | 19,8            |
| 28S  | 46,98          | 50,21        | 333,0 | 35,3            |

Assay Class: Eukaryote Total RNA Nano  
 Data Path: E:\...Eukaryote Total RNA Nano\_DE72901710\_2017-03-08\_10-30-01.xad

Created: 08.03.2017 10:30:01  
 Modified: 08.03.2017 10:53:07

**Electropherogram Summary Continued ...**

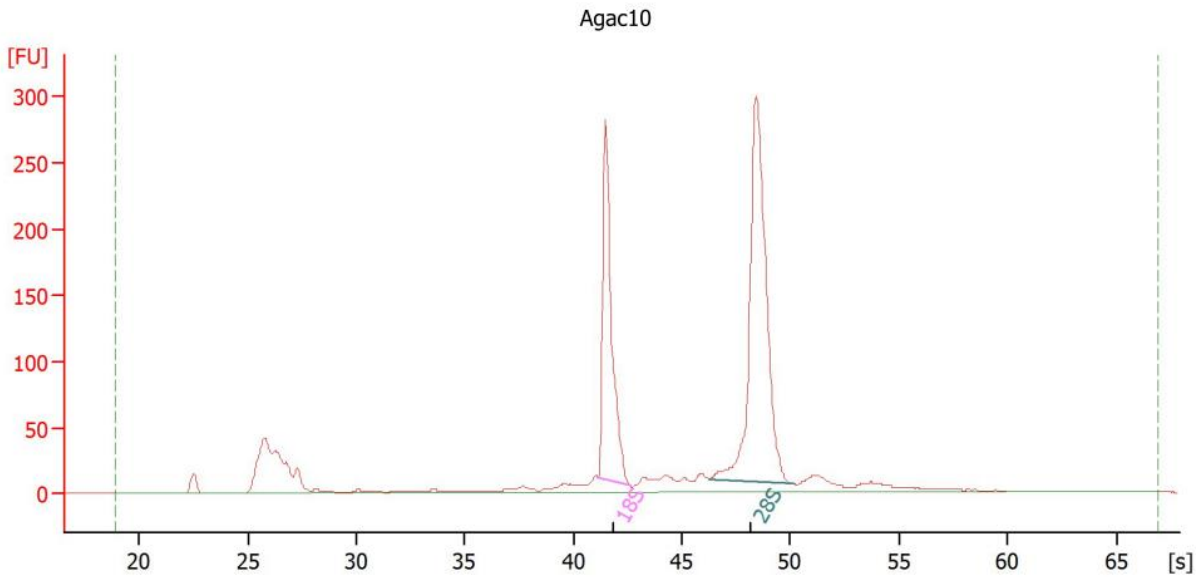

**Overall Results for sample 10 : Agac10**

|                         |           |                             |                                                                                                                             |
|-------------------------|-----------|-----------------------------|-----------------------------------------------------------------------------------------------------------------------------|
| RNA Area:               | 1.401,0   | RNA Integrity Number (RIN): | 9.8 (B.02.08)                                                                                                               |
| RNA Concentration:      | 588 ng/μl | Result Flagging Color:      | <span style="background-color: #ccccff; border: 1px solid black; display: inline-block; width: 20px; height: 10px;"></span> |
| rRNA Ratio [28s / 18s]: | 1,8       | Result Flagging Label:      | RIN: 9.80                                                                                                                   |

**Fragment table for sample 10 : Agac10**

| Name | Start Time [s] | End Time [s] | Area  | % of total Area |
|------|----------------|--------------|-------|-----------------|
| 18S  | 41,12          | 42,62        | 294,2 | 21,0            |
| 28S  | 46,21          | 50,14        | 527,0 | 37,6            |

Assay Class: Eukaryote Total RNA Nano  
 Data Path: E:\...Eukaryote Total RNA Nano\_DE72901710\_2017-03-08\_10-30-01.xad

Created: 08.03.2017 10:30:01  
 Modified: 08.03.2017 10:53:07

**Electropherogram Summary Continued ...**

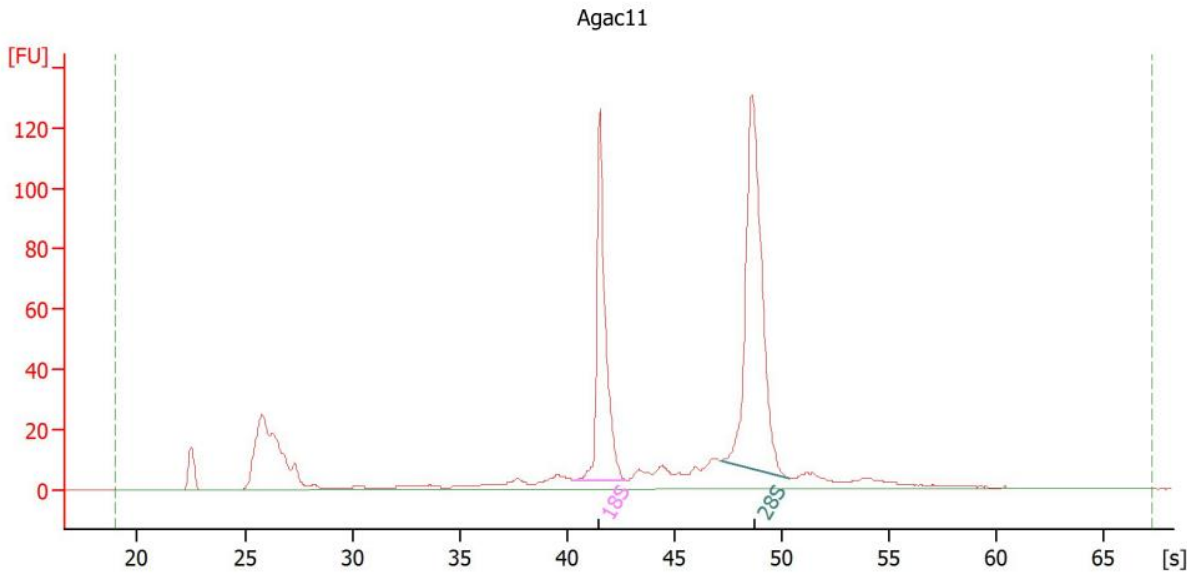

**Overall Results for sample 11 : Agac11**

|                         |           |                             |                                                                                                                             |
|-------------------------|-----------|-----------------------------|-----------------------------------------------------------------------------------------------------------------------------|
| RNA Area:               | 705,5     | RNA Integrity Number (RIN): | 9.5 (B.02.08)                                                                                                               |
| RNA Concentration:      | 296 ng/μl | Result Flagging Color:      | <span style="background-color: #ccccff; border: 1px solid black; display: inline-block; width: 20px; height: 10px;"></span> |
| rRNA Ratio [28s / 18s]: | 1,6       | Result Flagging Label:      | RIN: 9.50                                                                                                                   |

**Fragment table for sample 11 : Agac11**

| Name | Start Time [s] | End Time [s] | Area  | % of total Area |
|------|----------------|--------------|-------|-----------------|
| 18S  | 40,32          | 42,76        | 133,9 | 19,0            |
| 28S  | 47,14          | 50,36        | 218,9 | 31,0            |

Assay Class: Eukaryote Total RNA Nano  
 Data Path: E:\...Eukaryote Total RNA Nano\_DE72901710\_2017-03-08\_10-30-01.xad

Created: 08.03.2017 10:30:01  
 Modified: 08.03.2017 10:53:07

**Electropherogram Summary Continued ...**

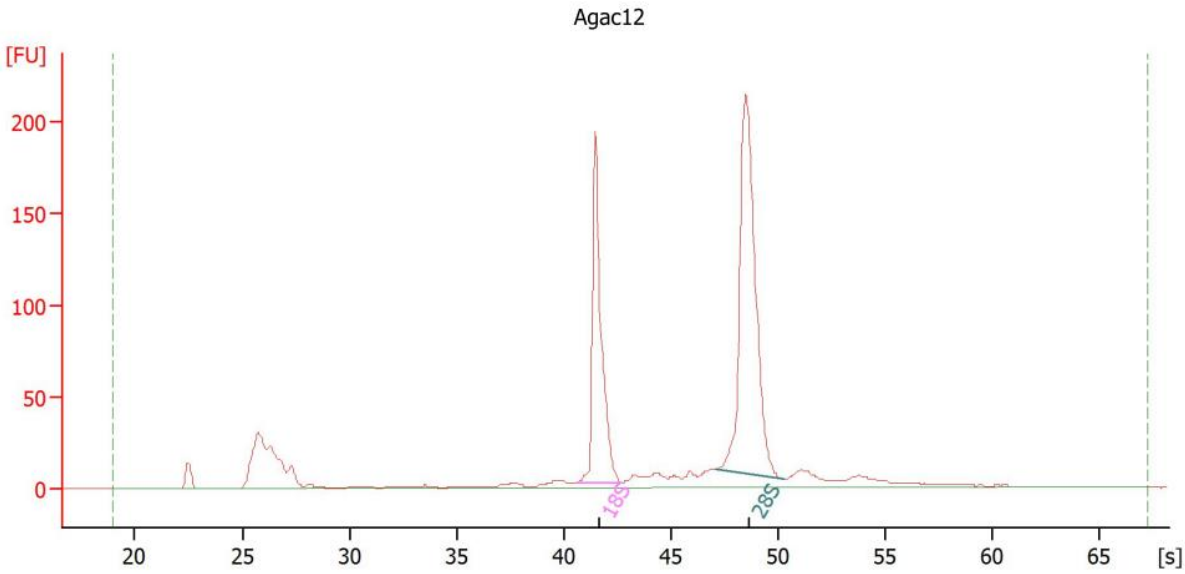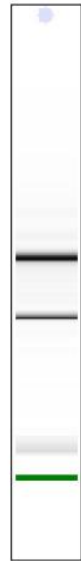

**Overall Results for sample 12 : Agac12**

|                         |           |                             |                                                                                                                             |
|-------------------------|-----------|-----------------------------|-----------------------------------------------------------------------------------------------------------------------------|
| RNA Area:               | 985,1     | RNA Integrity Number (RIN): | 9.9 (B.02.08)                                                                                                               |
| RNA Concentration:      | 414 ng/μl | Result Flagging Color:      | <span style="background-color: #ccccff; border: 1px solid black; display: inline-block; width: 20px; height: 10px;"></span> |
| rRNA Ratio [28s / 18s]: | 1,6       | Result Flagging Label:      | RIN: 9.90                                                                                                                   |

**Fragment table for sample 12 : Agac12**

| Name | Start Time [s] | End Time [s] | Area  | % of total Area |
|------|----------------|--------------|-------|-----------------|
| 18S  | 40,52          | 42,71        | 216,0 | 21,9            |
| 28S  | 47,09          | 50,26        | 354,0 | 35,9            |

Assay Class: Eukaryote Total RNA Nano  
Data Path: E:\...Eukaryote Total RNA Nano\_DE72901710\_2017-03-08\_10-30-01.xad

Created: 08.03.2017 10:30:01  
Modified: 08.03.2017 10:53:07

Gel Image

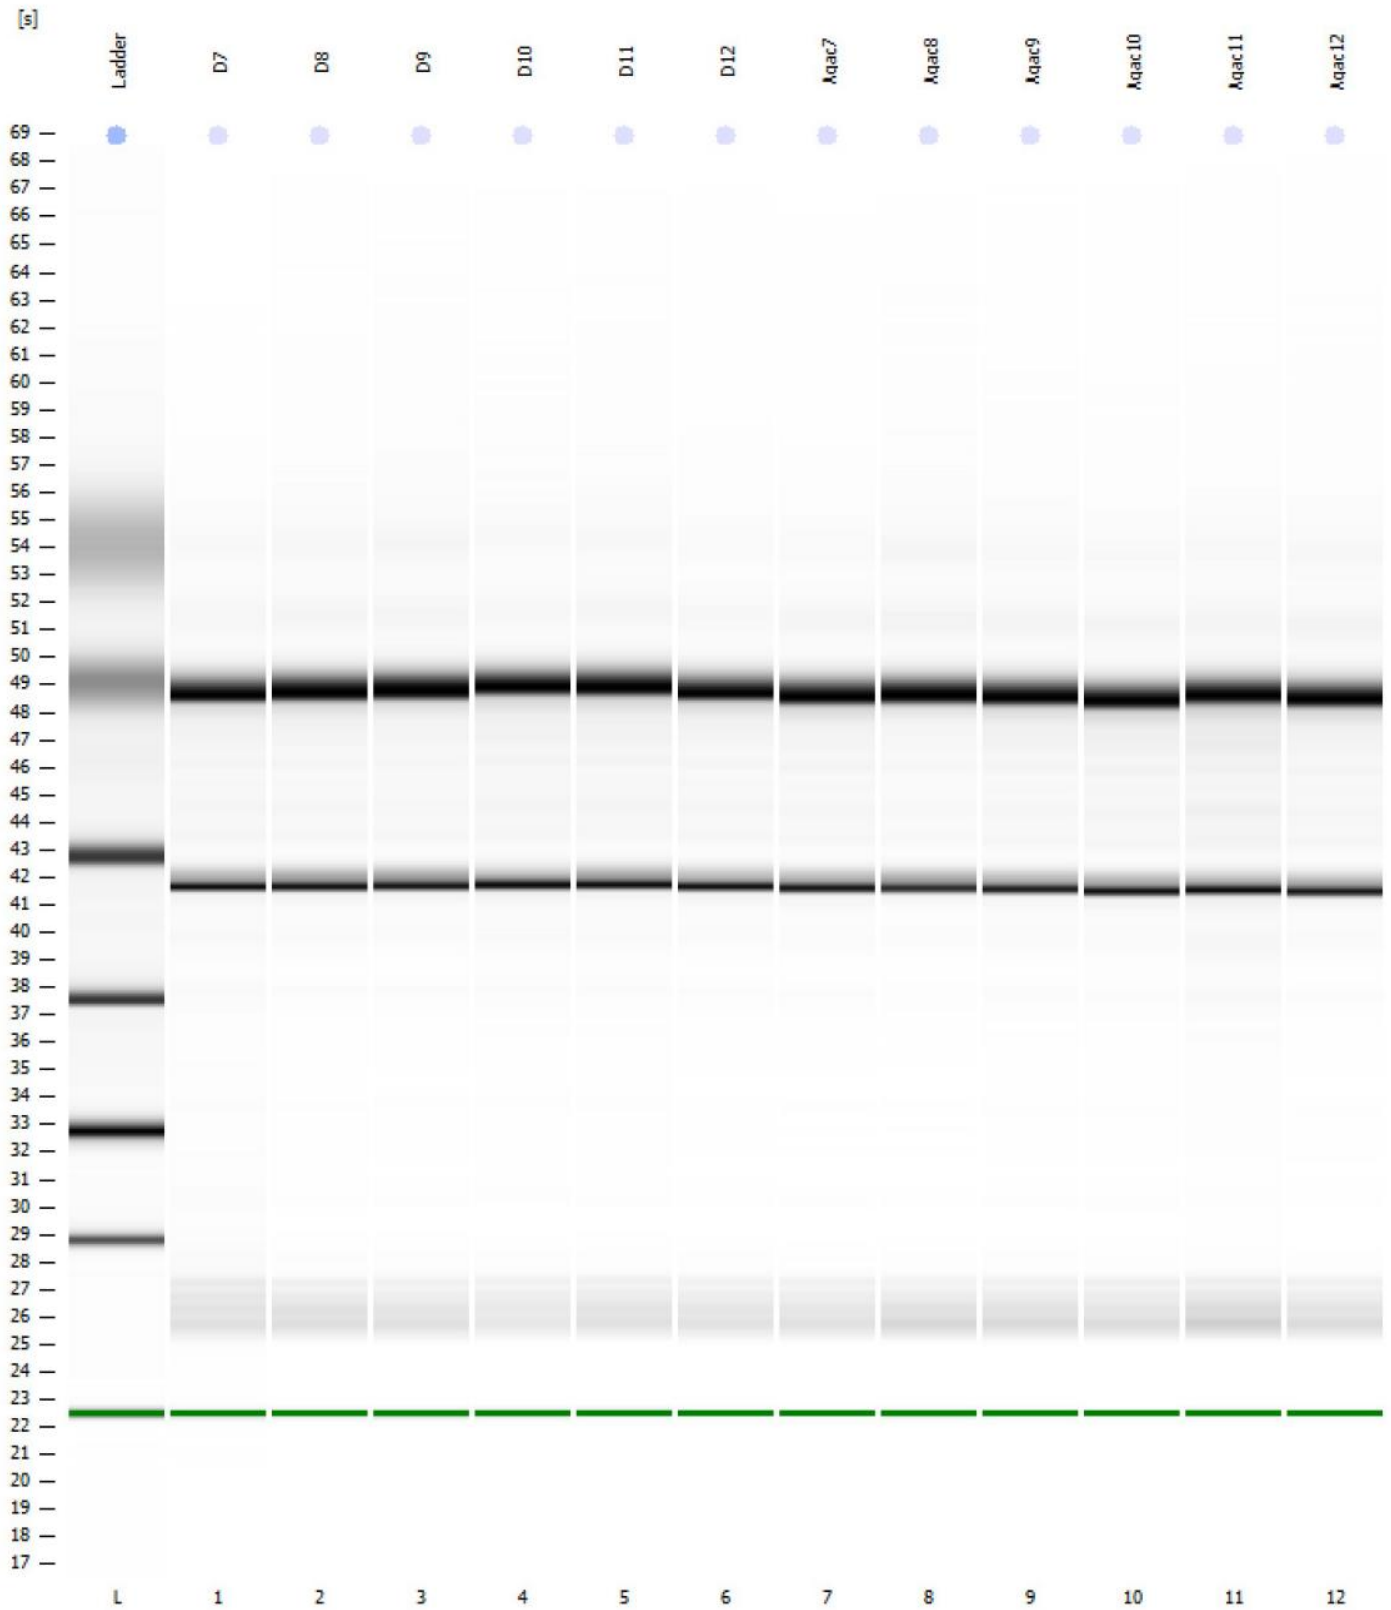

**Supplementary Data 3.** Amplification plot and Melting curve analysis (RT-qPCR).

**qPCR program (used in all qPCR runs)**

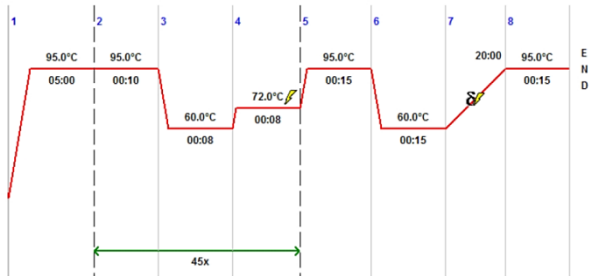

**GAPDH (main qPCR)**

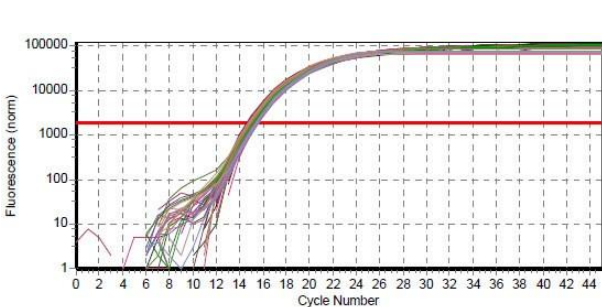

Threshold 1873 (Noiseband)

Amplification plot

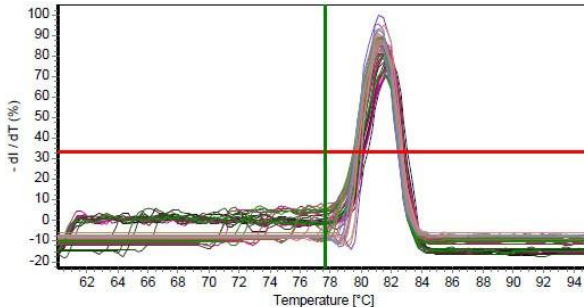

Threshold 33%

Melting curve

**PPIB (main qPCR)**

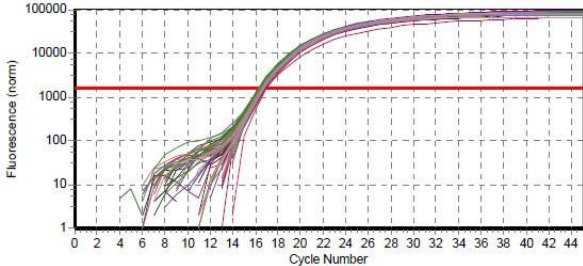

Threshold 1598 (Noiseband)

Amplification plot

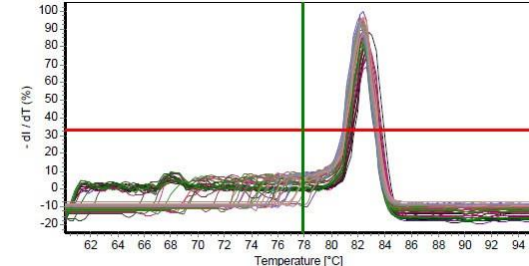

Threshold 33%

Melting curve

**YWHAZ (main qPCR)**

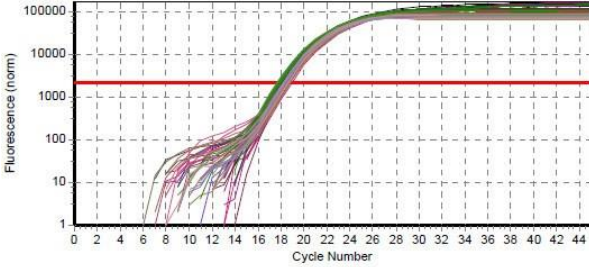

Threshold 2167 (Noiseband)

Amplification plot

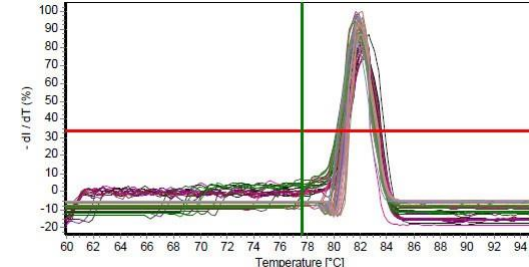

Threshold 33%

Melting curve

### POLR2A (main qPCR)

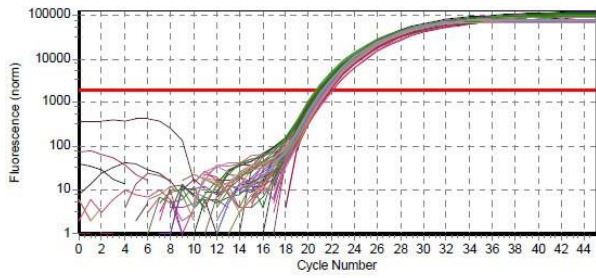

Threshold 1865 (Noiseband)

Amplification plot

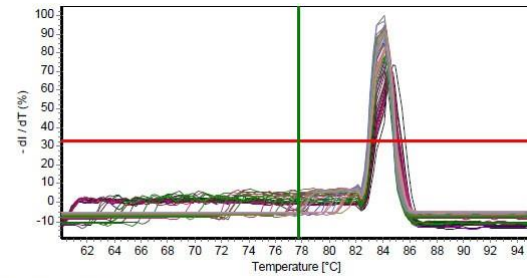

Threshold 33%

Melting curve

### TBP (main qPCR)

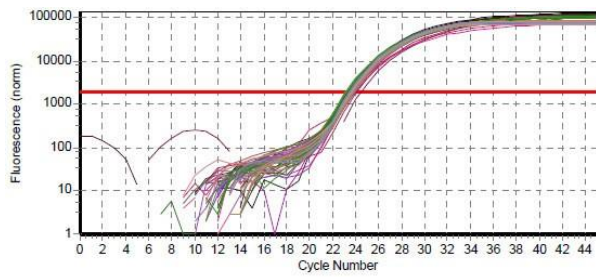

Threshold 1903 (Noiseband)

Amplification plot

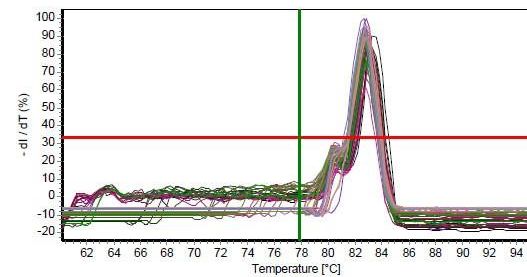

Threshold 33%

Melting curve

### RPL22 (main qPCR)

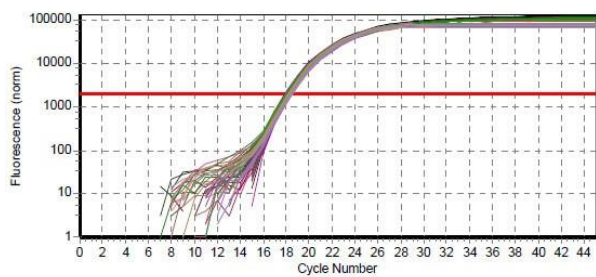

Threshold 1934 (Noiseband)

Amplification plot

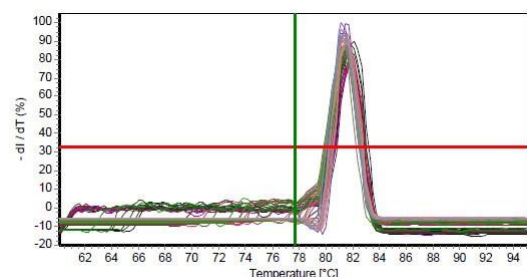

Threshold 33%

Melting curve

### EEF1A1 (main qPCR)

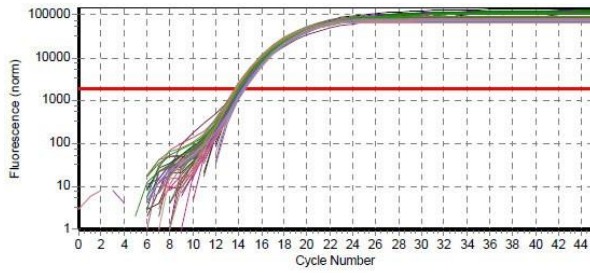

Threshold 1924 (Noiseband)

Amplification plot

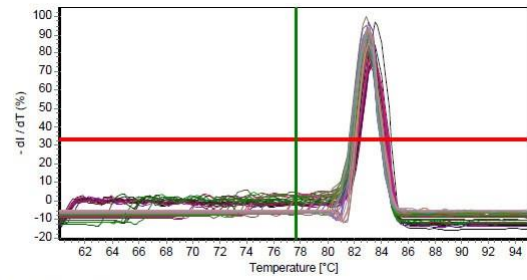

Threshold 33%

Melting curve

### RPLP0 (main qPCR)

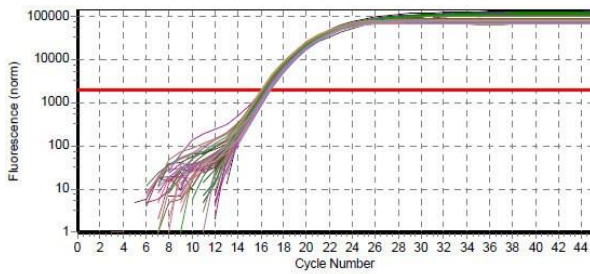

Threshold 2015 (Noiseband)

Amplification plot

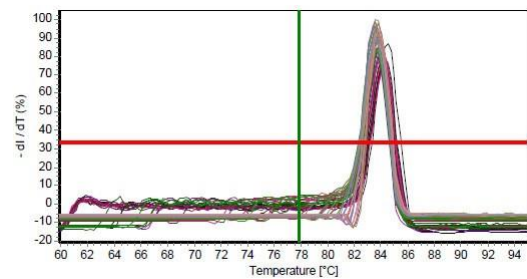

Threshold 33%

Melting curve

### RNA18S5 (main qPCR)

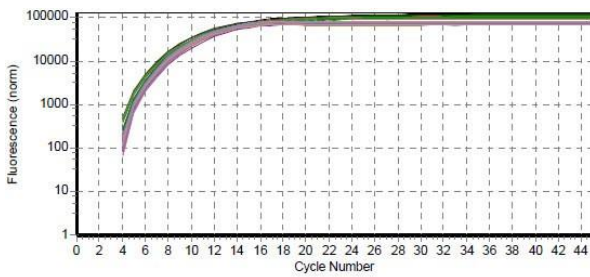

Threshold CalQplex

Amplification plot

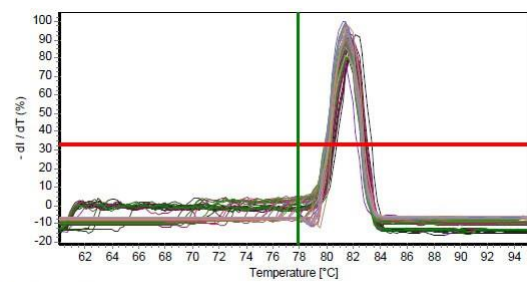

Threshold 33%

Melting curve



### GAPDH (efficiency qPCR – standard curve)

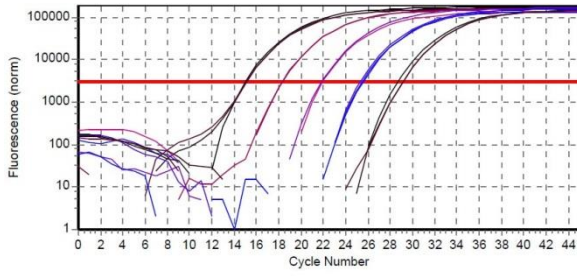

Threshold 3102 (Noiseband)

Amplification plot

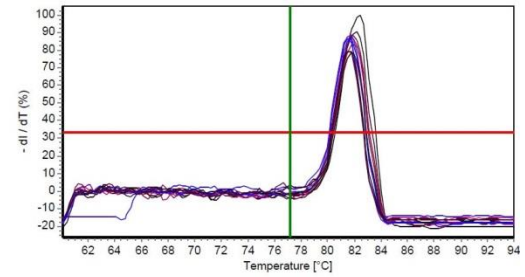

Threshold 33%

Melting curve

### PPIB (efficiency qPCR – standard curve)

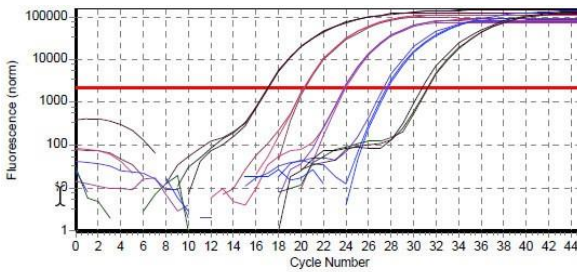

Threshold 2162 (Noiseband)

Amplification plot

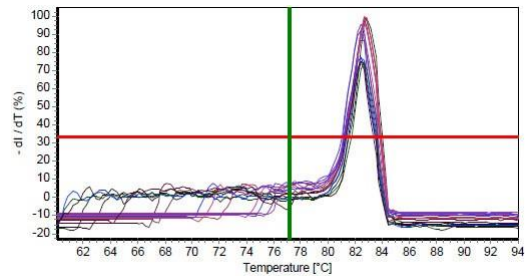

Threshold 33%

Melting curve

### YWHAZ (efficiency qPCR – standard curve)

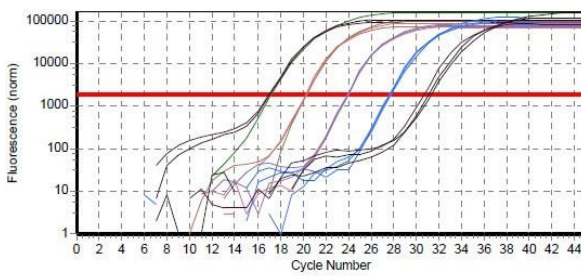

Threshold 1920 (Noiseband)

Amplification plot

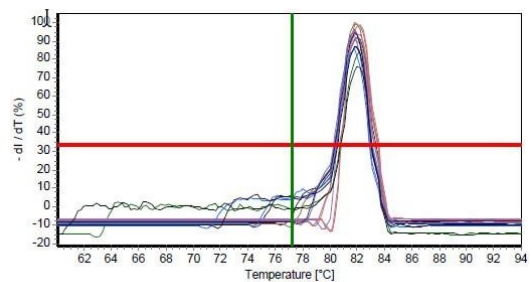

Threshold 33%

Melting curve

### POLR2A (efficiency qPCR – standard curve)

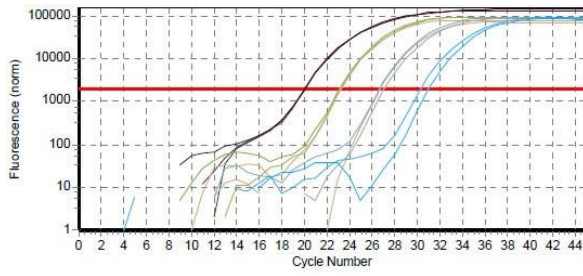

Threshold 1920 (Noiseband)

Amplification plot

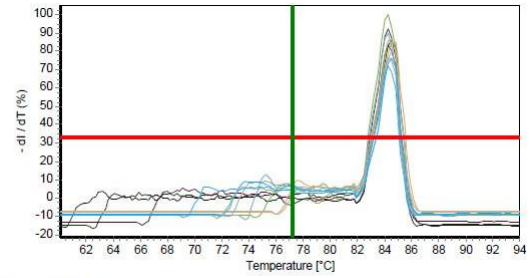

Threshold 33%

Melting curve

### TBP (efficiency qPCR – standard curve)

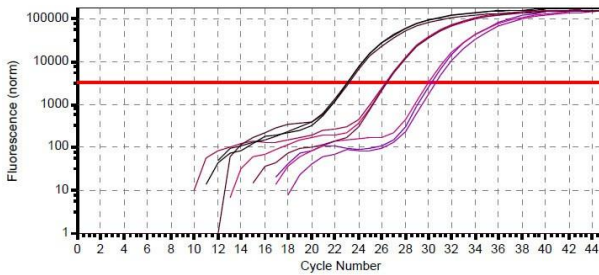

Threshold 3206 (Noiseband)

Amplification plot

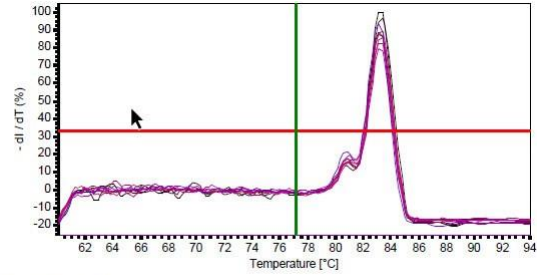

Threshold 33%

Melting curve

### RPL22 (efficiency qPCR – standard curve)

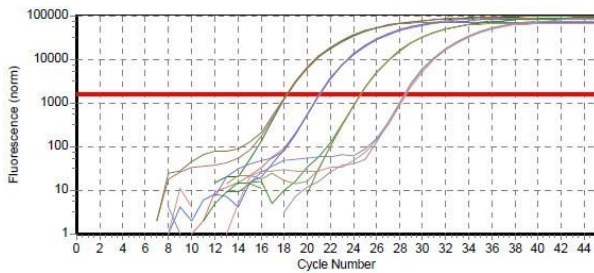

Threshold 1652 (Noiseband)

Amplification plot

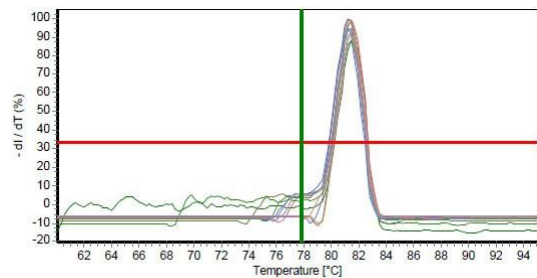

Threshold 33%

Melting curve

### EEF1A1 (efficiency qPCR – standard curve)

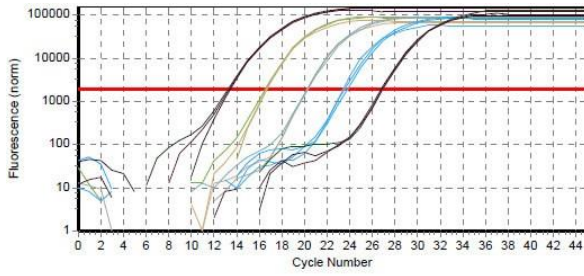

Threshold 1903 (Noiseband)

Amplification plot

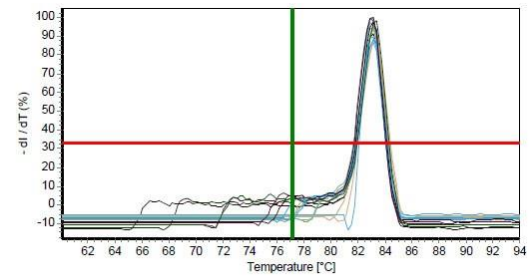

Threshold 33%

Melting curve

### RPLP0 (efficiency qPCR – standard curve)

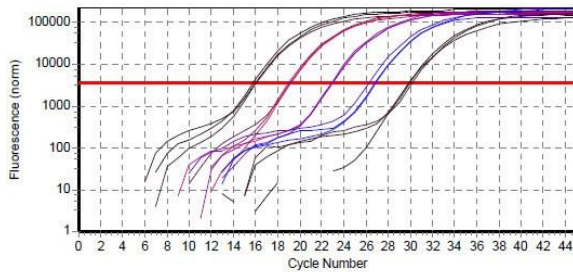

Threshold 3590 (Noiseband)

Amplification plot

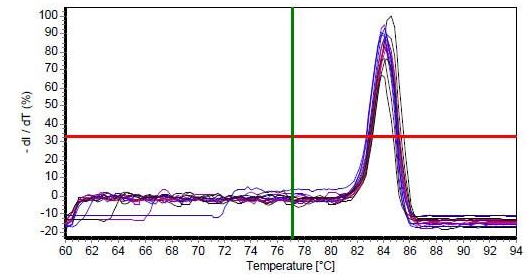

Threshold 33%

Melting curve

### RNA18S5 (efficiency qPCR – standard curve)

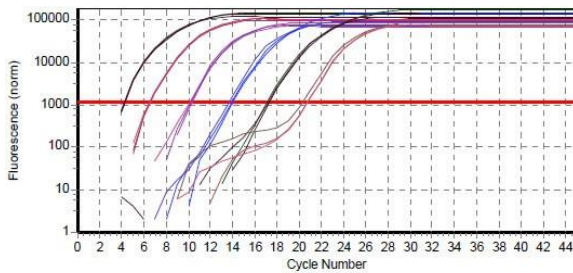

Threshold 1145 (Noiseband)

Amplification plot

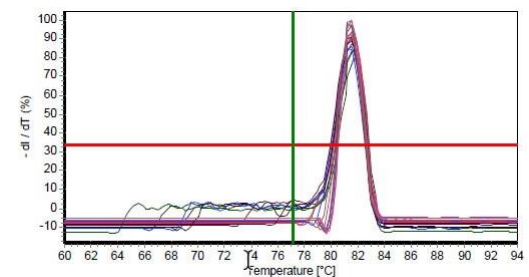

Threshold 33%

Melting curve

**Supplementary Data 4.** Evaluation of qPCR primer efficiency (factor-specific). Log<sub>10</sub> serial dilution of cDNA stock solution (1,000,000 pg RNA equivalent) was performed in triplets. From the resulting C<sub>q</sub> values a standard curve was created by linear regression.

GAPDH (factor-specific primer efficiency)

| Gene  | RNA equivalent [pg] | C <sub>q</sub> Triplet | C <sub>q</sub> 95%CI | C <sub>q</sub> Mean | C <sub>q</sub> SD | cDNA dilution     |
|-------|---------------------|------------------------|----------------------|---------------------|-------------------|-------------------|
| GAPDH | 100000              | 14.60                  |                      |                     |                   |                   |
| GAPDH | 100000              | 14.65                  | 14.56 /14.69         | 14.627              | 0.025             | 1:10              |
| GAPDH | 100000              | 14.63                  |                      |                     |                   |                   |
| GAPDH | 10000               | 17.91                  |                      |                     |                   |                   |
| GAPDH | 10000               | 17.89                  | 17.74 /18.15         | 17.947              | 0.081             | 1:10 <sup>2</sup> |
| GAPDH | 10000               | 18.04                  |                      |                     |                   |                   |
| GAPDH | 1000                | 21.56                  |                      |                     |                   |                   |
| GAPDH | 1000                | 21.30                  | 21.11 /21.76         | 21.433              | 0.130             | 1:10 <sup>3</sup> |
| GAPDH | 1000                | 21.44                  |                      |                     |                   |                   |
| GAPDH | 100                 | 24.90                  |                      |                     |                   |                   |
| GAPDH | 100                 | 25.03                  | 24.74 /25.29         | 25.017              | 0.111             | 1:10 <sup>4</sup> |
| GAPDH | 100                 | 25.12                  |                      |                     |                   |                   |
| GAPDH | 10                  | 28.27                  |                      |                     |                   |                   |
| GAPDH | 10                  | 28.69                  | 27.95 /29.14         | 28.547              | 0.240             | 1:10 <sup>5</sup> |
| GAPDH | 10                  | 28.68                  |                      |                     |                   |                   |
| GAPDH | 1                   | 33.26                  |                      |                     |                   |                   |
| GAPDH | 1                   | 31.55                  | 29.80 /34.53         | 32.163              | 0.952             | 1:10 <sup>6</sup> |
| GAPDH | 1                   | 31.68                  |                      |                     |                   |                   |
| GAPDH | NTC                 | 39.62                  |                      |                     |                   |                   |

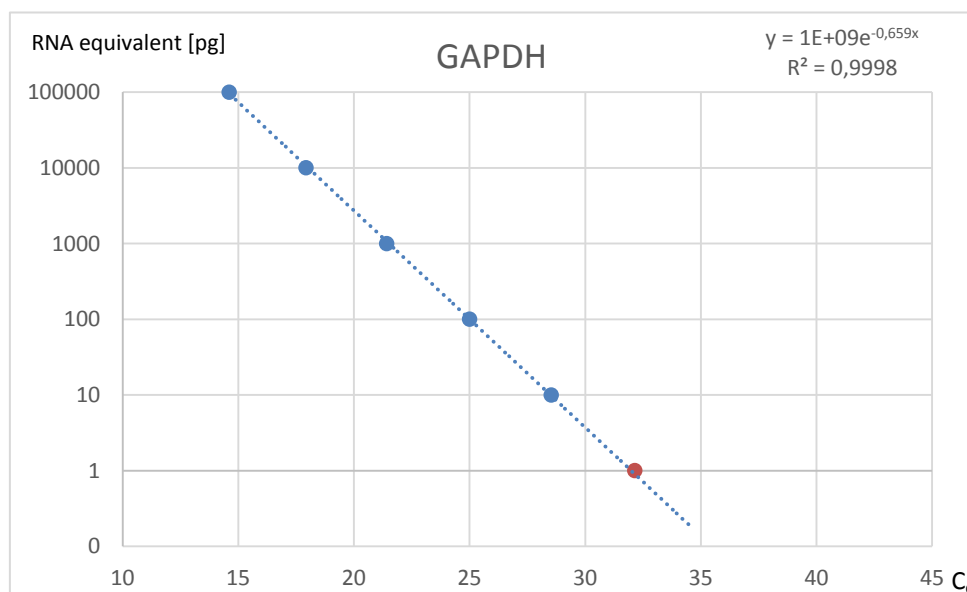

| Slope           | % Efficiency | LDR                      | LOD                |
|-----------------|--------------|--------------------------|--------------------|
| [95% CI]        | [95% CI]     | (dilution range)         | (dilution)         |
| -3.480          | 93.8         | 1:10 – 1:10 <sup>5</sup> | ≤1:10 <sup>6</sup> |
| [-3.661/-3.299] | [87.6/101.0] |                          |                    |

SD = standard deviation; NTC = no-template control; LDR = linear dynamic range; LOD = limit of detection; R<sup>2</sup> = coefficient of determination; CI = confidence interval

PPIB (factor-specific primer efficiency)

| Gene | RNA equivalent [pg] | C <sub>q</sub> Triplet | C <sub>q</sub> 95%CI | C <sub>q</sub> Mean | C <sub>q</sub> SD | cDNA dilution     |
|------|---------------------|------------------------|----------------------|---------------------|-------------------|-------------------|
| PPIB | 100000              | 16.91                  | 16.88 /16.92         | 16.900              | 0.010             | 1:10              |
| PPIB | 100000              | 16.90                  |                      |                     |                   |                   |
| PPIB | 100000              | 16.89                  |                      |                     |                   |                   |
| PPIB | 10000               | 20.21                  | 20.00 /20.29         | 20.143              | 0.058             | 1:10 <sup>2</sup> |
| PPIB | 10000               | 20.11                  |                      |                     |                   |                   |
| PPIB | 10000               | 20.11                  |                      |                     |                   |                   |
| PPIB | 1000                | 23.72                  | 23.60 /23.90         | 23.750              | 0.061             | 1:10 <sup>3</sup> |
| PPIB | 1000                | 23.82                  |                      |                     |                   |                   |
| PPIB | 1000                | 23.71                  |                      |                     |                   |                   |
| PPIB | 100                 | 27.19                  | 26.90 /27.94         | 27.420              | 0.210             | 1:10 <sup>4</sup> |
| PPIB | 100                 | 27.47                  |                      |                     |                   |                   |
| PPIB | 100                 | 27.60                  |                      |                     |                   |                   |
| PPIB | 10                  | 31.14                  | 30.21 /31.66         | 30.933              | 0.291             | 1:10 <sup>5</sup> |
| PPIB | 10                  | 30.60                  |                      |                     |                   |                   |
| PPIB | 10                  | 31.06                  |                      |                     |                   |                   |
| PPIB | 1                   | 33.62                  | 31.18 /39.97         | 35.573              | 1.770             | 1:10 <sup>6</sup> |
| PPIB | 1                   | 36.03                  |                      |                     |                   |                   |
| PPIB | 1                   | 37.07                  |                      |                     |                   |                   |
| PPIB | NTC                 | 35.92                  |                      |                     |                   |                   |

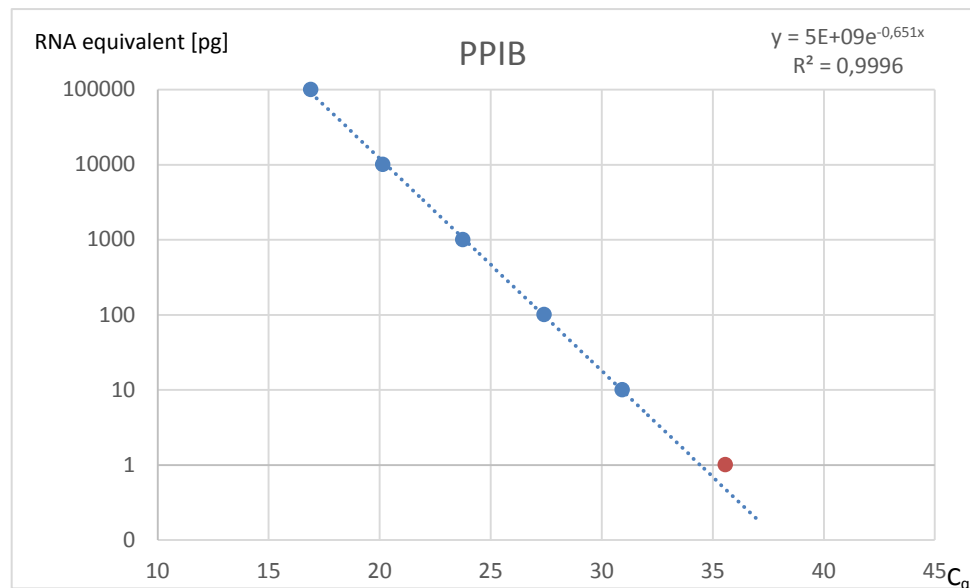

| Slope           | % Efficiency | LDR                      | LOD                |
|-----------------|--------------|--------------------------|--------------------|
| [95% CI]        | [95% CI]     | (dilution range)         | (dilution)         |
| -3.509          | 92.7         | 1:10 – 1:10 <sup>5</sup> | ≤1:10 <sup>6</sup> |
| [-3.808/-3.209] | [83.1/104.9] |                          |                    |

SD = standard deviation; NTC = no-template control; LDR = linear dynamic range; LOD = limit of detection; R<sup>2</sup> = coefficient of determination; CI = confidence interval

YWHAZ (factor-specific primer efficiency)

| Gene  | RNA equivalent [pg] | C <sub>q</sub> Triplet | C <sub>q</sub> 95%CI | C <sub>q</sub> Mean | C <sub>q</sub> SD | cDNA dilution     |
|-------|---------------------|------------------------|----------------------|---------------------|-------------------|-------------------|
| YWHAZ | 100000              | 17.20                  | 16.85 /17.35         | 17.100              | 0.100             | 1:10              |
| YWHAZ | 100000              | 17.10                  |                      |                     |                   |                   |
| YWHAZ | 100000              | 17.00                  |                      |                     |                   |                   |
| YWHAZ | 10000               | 20.33                  | 20.21 /20.39         | 20.300              | 0.036             | 1:10 <sup>2</sup> |
| YWHAZ | 10000               | 20.26                  |                      |                     |                   |                   |
| YWHAZ | 10000               | 20.31                  |                      |                     |                   |                   |
| YWHAZ | 1000                | 24.04                  | 23.94 /24.08         | 24.010              | 0.030             | 1:10 <sup>3</sup> |
| YWHAZ | 1000                | 23.98                  |                      |                     |                   |                   |
| YWHAZ | 1000                | 24.01                  |                      |                     |                   |                   |
| YWHAZ | 100                 | 27.72                  | 27.53 /27.93         | 27.733              | 0.081             | 1:10 <sup>4</sup> |
| YWHAZ | 100                 | 27.66                  |                      |                     |                   |                   |
| YWHAZ | 100                 | 27.82                  |                      |                     |                   |                   |
| YWHAZ | 10                  | 31.34                  | 30.26 /31.85         | 31.053              | 0.319             | 1:10 <sup>5</sup> |
| YWHAZ | 10                  | 31.11                  |                      |                     |                   |                   |
| YWHAZ | 10                  | 30.71                  |                      |                     |                   |                   |
| YWHAZ | 1                   | 36.90                  | 30.73 /39.16         | 34.943              | 1.696             | 1:10 <sup>6</sup> |
| YWHAZ | 1                   | 34.03                  |                      |                     |                   |                   |
| YWHAZ | 1                   | 33.90                  |                      |                     |                   |                   |
| YWHAZ | NTC                 | -                      |                      |                     |                   |                   |

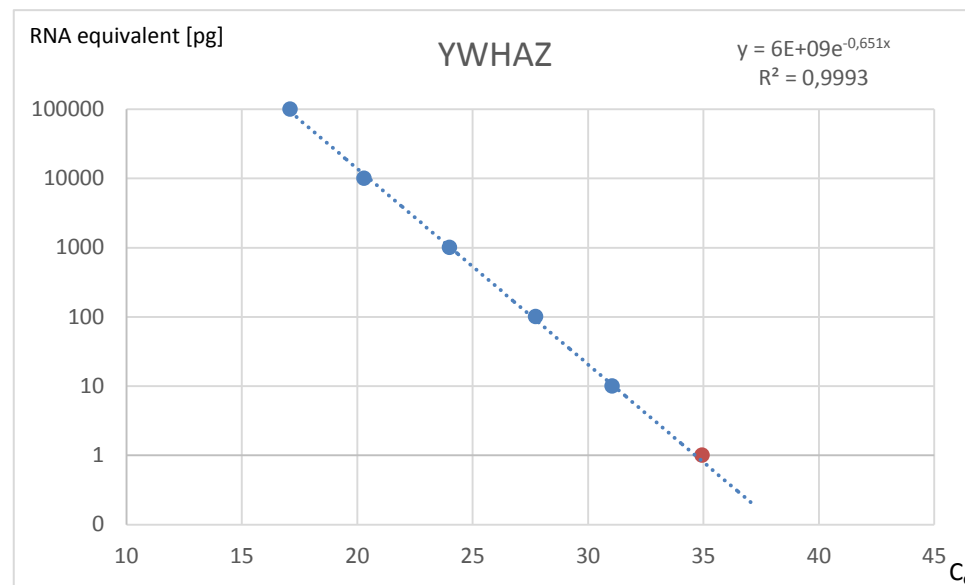

| Slope           | % Efficiency | LDR                      | LOD                |
|-----------------|--------------|--------------------------|--------------------|
| [95% CI]        | [95% CI]     | (dilution range)         | (dilution)         |
| -3.488          | 93.5         | 1:10 – 1:10 <sup>5</sup> | ≤1:10 <sup>6</sup> |
| [-3.915/-3.062] | [80.1/112.1] |                          |                    |

SD = standard deviation; NTC = no-template control; LDR = linear dynamic range; LOD = limit of detection; R<sup>2</sup> = coefficient of determination; CI = confidence interval

POLR2A (factor-specific primer efficiency)

| Gene   | RNA equivalent [pg] | C <sub>q</sub> Triplet | C <sub>q</sub> 95%CI | C <sub>q</sub> Mean | C <sub>q</sub> SD | cDNA dilution     |
|--------|---------------------|------------------------|----------------------|---------------------|-------------------|-------------------|
| POLR2A | 100000              | 20.01                  | 19.93 /20.13         | 20.033              | 0.040             | 1:10              |
| POLR2A | 100000              | 20.08                  |                      |                     |                   |                   |
| POLR2A | 100000              | 20.01                  |                      |                     |                   |                   |
| POLR2A | 10000               | 23.11                  | 23.01 /23.37         | 23.193              | 0.072             | 1:10 <sup>2</sup> |
| POLR2A | 10000               | 23.23                  |                      |                     |                   |                   |
| POLR2A | 10000               | 23.24                  |                      |                     |                   |                   |
| POLR2A | 1000                | 26.72                  | 26.31 /27.31         | 26.810              | 0.201             | 1:10 <sup>3</sup> |
| POLR2A | 1000                | 27.04                  |                      |                     |                   |                   |
| POLR2A | 1000                | 26.67                  |                      |                     |                   |                   |
| POLR2A | 100                 | 30.51                  | 29.72 /31.47         | 30.593              | 0.352             | 1:10 <sup>4</sup> |
| POLR2A | 100                 | 30.29                  |                      |                     |                   |                   |
| POLR2A | 100                 | 30.98                  |                      |                     |                   |                   |
| POLR2A | 10                  | 36.85                  | 30.14 /39.74         | 33.985              | 1.407             | 1:10 <sup>5</sup> |
| POLR2A | 10                  | 32.99                  |                      |                     |                   |                   |
| POLR2A | 10                  | 34.98                  |                      |                     |                   |                   |
| POLR2A | 1                   | 37.83                  | 34.50 /39.49         | 36.993              | 1.004             | 1:10 <sup>6</sup> |
| POLR2A | 1                   | 35.88                  |                      |                     |                   |                   |
| POLR2A | 1                   | 37.27                  |                      |                     |                   |                   |
| POLR2A | NTC                 | 37.11                  |                      |                     |                   |                   |

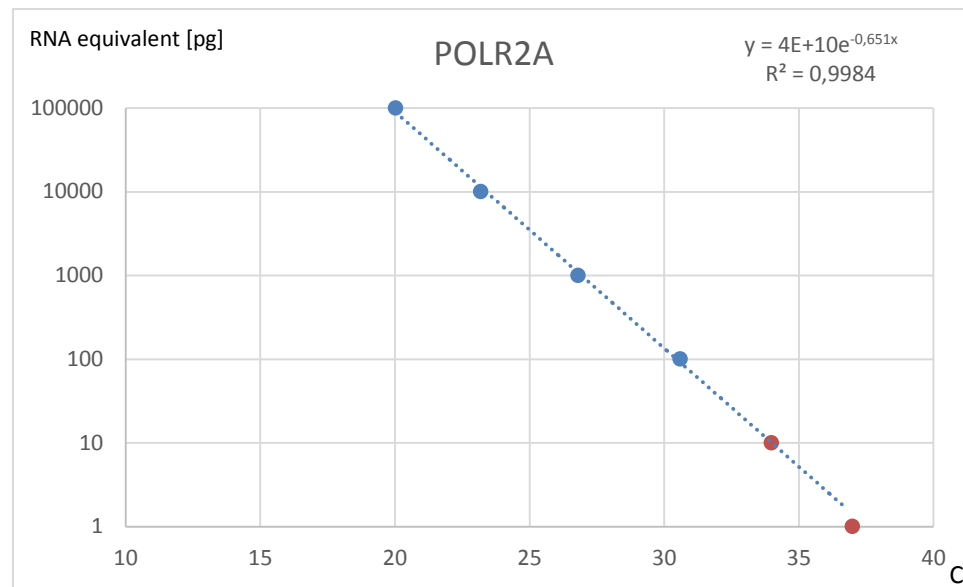

| Slope           | % Efficiency | LDR                      | LOD                |
|-----------------|--------------|--------------------------|--------------------|
| [95% CI]        | [95% CI]     | (dilution range)         | (dilution)         |
| -3.520          | 92.3         | 1:10 – 1:10 <sup>4</sup> | ≤1:10 <sup>6</sup> |
| [-4.321/-2.719] | [70.4/133.2] |                          |                    |

SD = standard deviation; NTC = no-template control; LDR = linear dynamic range; LOD = limit of detection; R<sup>2</sup> = coefficient of determination; CI = confidence interval

TBP (factor-specific primer efficiency)

| Gene | RNA equivalent [pg] | C <sub>q</sub> Triplet | C <sub>q</sub> 95%CI | C <sub>q</sub> Mean | C <sub>q</sub> SD | cDNA dilution     |
|------|---------------------|------------------------|----------------------|---------------------|-------------------|-------------------|
| TBP  | 100000              | 26.53                  | 26.46 /26.64         | 26.550              | 0.035             | 1:10              |
| TBP  | 10000               | 29.80                  | 29.72 /29.83         | 29.773              | 0.023             | 1:10 <sup>2</sup> |
| TBP  | 1000                | 33.35                  | 32.96 /34.30         | 33.627              | 0.270             | 1:10 <sup>3</sup> |
| TBP  | 100                 | 35.19                  | 34.28 /37.07         | 35.677              | 0.561             | 1:10 <sup>4</sup> |
| TBP  | 10                  | -                      | -                    | 41.110              | -                 | 1:10 <sup>5</sup> |
| TBP  | 1                   | -                      | -                    | 39.080              | -                 | 1:10 <sup>6</sup> |
| TBP  | NTC                 | -                      | -                    | -                   | -                 | -                 |

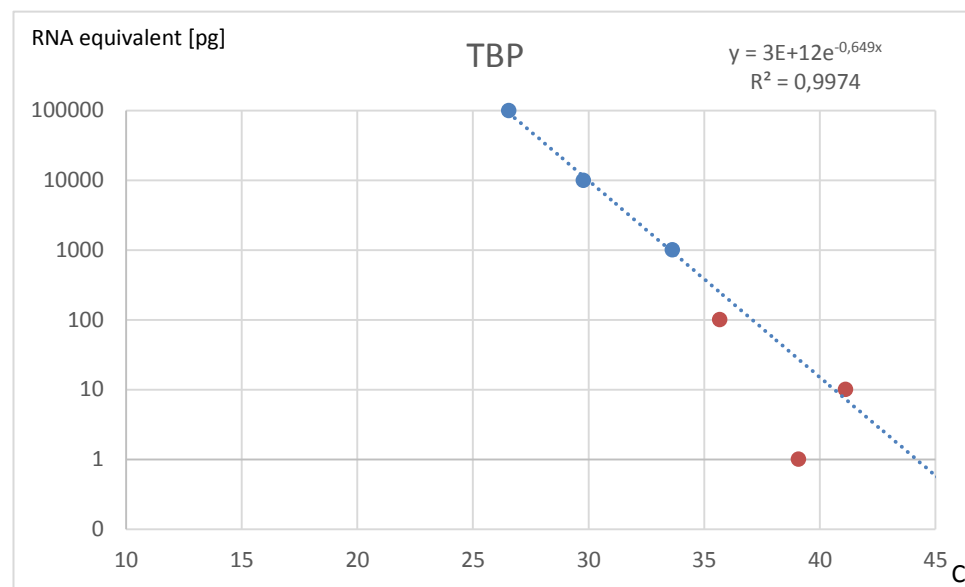

| Slope          | % Efficiency | LDR                      | LOD               |
|----------------|--------------|--------------------------|-------------------|
| [95% CI]       | [95% CI]     | (dilution range)         | (dilution)        |
| -3.538         | 91.7         | 1:10 – 1:10 <sup>3</sup> | 1:10 <sup>4</sup> |
| [-7.540/0.465] | -            | -                        | -                 |

SD = standard deviation; NTC = no-template control; LDR = linear dynamic range; LOD = limit of detection; R<sup>2</sup> = coefficient of determination; CI = confidence interval



RPL22 (factor-specific primer efficiency)

| Gene  | RNA equivalent [pg] | C <sub>q</sub> Triplet | C <sub>q</sub> 95%CI | C <sub>q</sub> Mean | C <sub>q</sub> SD | cDNA dilution     |
|-------|---------------------|------------------------|----------------------|---------------------|-------------------|-------------------|
| RPL22 | 100000              | 18.09                  | 17.88 /18.19         | 18.037              | 0.061             | 1:10              |
| RPL22 | 100000              | 17.97                  |                      |                     |                   |                   |
| RPL22 | 100000              | 18.05                  |                      |                     |                   |                   |
| RPL22 | 10000               | 20.86                  | 20.77 /20.91         | 20.840              | 0.026             | 1:10 <sup>2</sup> |
| RPL22 | 10000               | 20.81                  |                      |                     |                   |                   |
| RPL22 | 10000               | 20.85                  |                      |                     |                   |                   |
| RPL22 | 1000                | 24.37                  | 24.33 /24.40         | 24.367              | 0.015             | 1:10 <sup>3</sup> |
| RPL22 | 1000                | 24.38                  |                      |                     |                   |                   |
| RPL22 | 1000                | 24.35                  |                      |                     |                   |                   |
| RPL22 | 100                 | 28.18                  | 28.04 /28.45         | 28.247              | 0.083             | 1:10 <sup>4</sup> |
| RPL22 | 100                 | 28.22                  |                      |                     |                   |                   |
| RPL22 | 100                 | 28.34                  |                      |                     |                   |                   |
| RPL22 | 10                  | 32.68                  | 31.59 /33.24         | 32.413              | 0.333             | 1:10 <sup>5</sup> |
| RPL22 | 10                  | 32.04                  |                      |                     |                   |                   |
| RPL22 | 10                  | 32.52                  |                      |                     |                   |                   |
| RPL22 | 1                   | 34.16                  | -                    | 34.160              | 0.000             | 1:10 <sup>6</sup> |
| RPL22 | 1                   | 34.16                  |                      |                     |                   |                   |
| RPL22 | 1                   | 34.16                  |                      |                     |                   |                   |
| RPL22 | NTC                 | -                      |                      |                     |                   |                   |

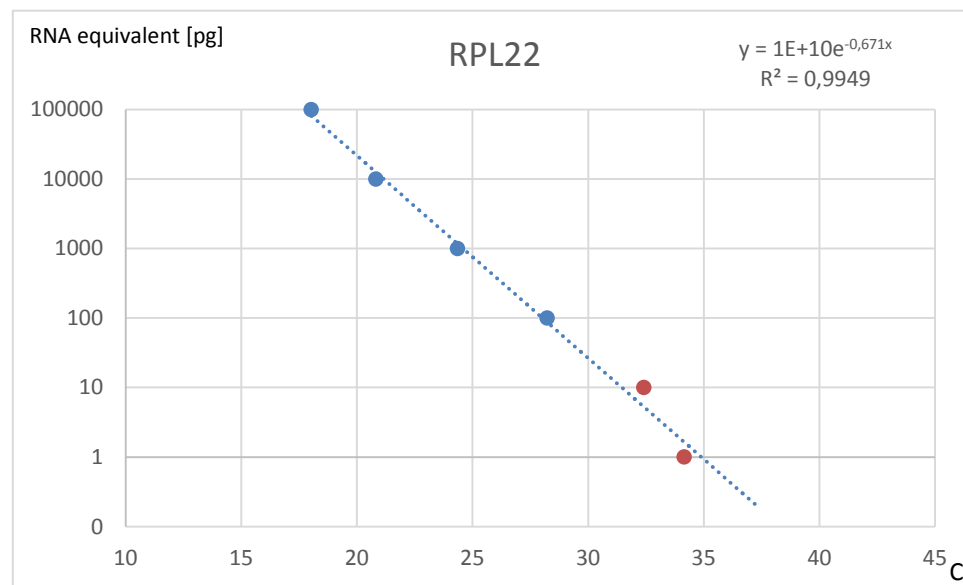

| Slope           | % Efficiency | LDR                      | LOD                |
|-----------------|--------------|--------------------------|--------------------|
| [95% CI]        | [95% CI]     | (dilution range)         | (dilution)         |
| -3.403          | 96.7         | 1:10 – 1:10 <sup>4</sup> | ≤1:10 <sup>6</sup> |
| [-4.767/-2.039] | [62.1/209.3] |                          |                    |

SD = standard deviation; NTC = no-template control; LDR = linear dynamic range; LOD = limit of detection; R<sup>2</sup> = coefficient of determination; CI = confidence interval

EEF1A1 (factor-specific primer efficiency)

| Gene   | RNA equivalent [pg] | C <sub>q</sub> Triplet | C <sub>q</sub> 95%CI | C <sub>q</sub> Mean | C <sub>q</sub> SD | cDNA dilution     |
|--------|---------------------|------------------------|----------------------|---------------------|-------------------|-------------------|
| EEF1A1 | 100000              | 16.72                  | 16.25 /17.20         | 16.727              | 0.190             | 1:10              |
| EEF1A1 | 100000              | 16.92                  |                      |                     |                   |                   |
| EEF1A1 | 100000              | 16.54                  |                      |                     |                   |                   |
| EEF1A1 | 10000               | 19.16                  | 18.76 /19.61         | 19.187              | 0.172             | 1:10 <sup>2</sup> |
| EEF1A1 | 10000               | 19.37                  |                      |                     |                   |                   |
| EEF1A1 | 10000               | 19.03                  |                      |                     |                   |                   |
| EEF1A1 | 1000                | 22.54                  | 22.21 /23.44         | 22.820              | 0.248             | 1:10 <sup>3</sup> |
| EEF1A1 | 1000                | 23.01                  |                      |                     |                   |                   |
| EEF1A1 | 1000                | 22.91                  |                      |                     |                   |                   |
| EEF1A1 | 100                 | 25.53                  | 24.81 /27.44         | 26.127              | 0.529             | 1:10 <sup>4</sup> |
| EEF1A1 | 100                 | 26.31                  |                      |                     |                   |                   |
| EEF1A1 | 100                 | 26.54                  |                      |                     |                   |                   |
| EEF1A1 | 10                  | 30.23                  | 29.38 /30.60         | 29.987              | 0.245             | 1:10 <sup>5</sup> |
| EEF1A1 | 10                  | 29.74                  |                      |                     |                   |                   |
| EEF1A1 | 10                  | 29.99                  |                      |                     |                   |                   |
| EEF1A1 | 1                   | 33.03                  | 31.70 /33.71         | 32.703              | 0.405             | 1:10 <sup>6</sup> |
| EEF1A1 | 1                   | 32.83                  |                      |                     |                   |                   |
| EEF1A1 | 1                   | 32.25                  |                      |                     |                   |                   |
| EEF1A1 | NTC                 | -                      |                      |                     |                   |                   |

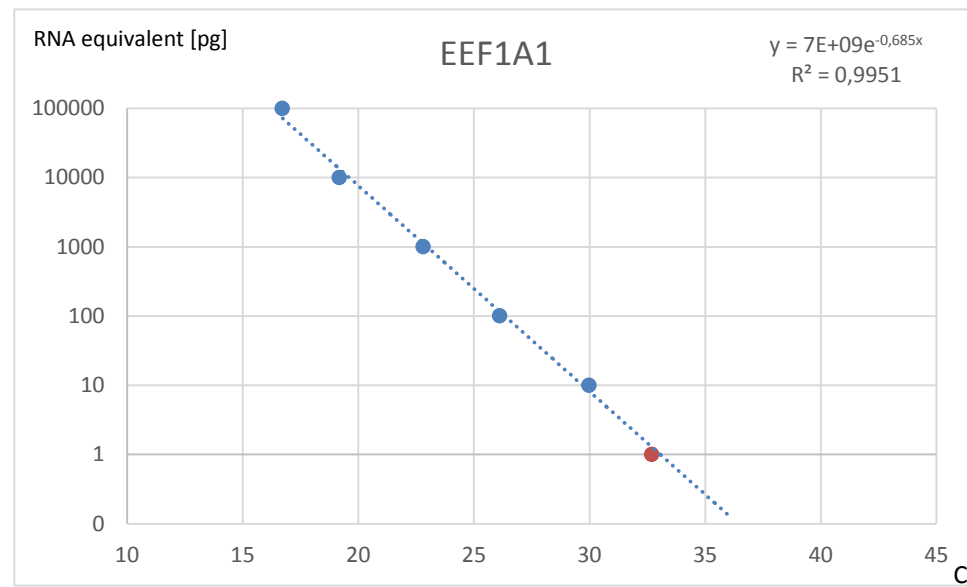

| Slope           | % Efficiency | LDR                      | LOD                |
|-----------------|--------------|--------------------------|--------------------|
| [95% CI]        | [95% CI]     | (dilution range)         | (dilution)         |
| -3.315          | 100.3        | 1:10 – 1:10 <sup>5</sup> | ≤1:10 <sup>6</sup> |
| [-4.291/-2.339] | [71.0/167.6] |                          |                    |

SD = standard deviation; NTC = no-template control; LDR = linear dynamic range; LOD = limit of detection; R<sup>2</sup> = coefficient of determination; CI = confidence interval

RPLP0 (factor-specific primer efficiency)

| Gene  | RNA equivalent [pg] | C <sub>q</sub> Triplet | C <sub>q</sub> 95%CI | C <sub>q</sub> Mean | C <sub>q</sub> SD | cDNA dilution     |
|-------|---------------------|------------------------|----------------------|---------------------|-------------------|-------------------|
| RPLP0 | 100000              | 15.15                  | 14.94 /15.70         | 15.317              | 0.153             | 1:10              |
| RPLP0 | 100000              | 15.35                  |                      |                     |                   |                   |
| RPLP0 | 100000              | 15.45                  |                      |                     |                   |                   |
| RPLP0 | 10000               | 18.52                  | 18.26 /18.76         | 18.507              | 0.101             | 1:10 <sup>2</sup> |
| RPLP0 | 10000               | 18.40                  |                      |                     |                   |                   |
| RPLP0 | 10000               | 18.60                  |                      |                     |                   |                   |
| RPLP0 | 1000                | 22.30                  | 22.18 /22.41         | 22.297              | 0.045             | 1:10 <sup>3</sup> |
| RPLP0 | 1000                | 22.34                  |                      |                     |                   |                   |
| RPLP0 | 1000                | 22.25                  |                      |                     |                   |                   |
| RPLP0 | 100                 | 25.61                  | 25.13 /26.93         | 26.027              | 0.363             | 1:10 <sup>4</sup> |
| RPLP0 | 100                 | 26.20                  |                      |                     |                   |                   |
| RPLP0 | 100                 | 26.27                  |                      |                     |                   |                   |
| RPLP0 | 10                  | 29.30                  | 28.94 /29.77         | 29.353              | 0.167             | 1:10 <sup>5</sup> |
| RPLP0 | 10                  | 29.22                  |                      |                     |                   |                   |
| RPLP0 | 10                  | 29.54                  |                      |                     |                   |                   |
| RPLP0 | 1                   | 32.49                  | 31.85 /32.73         | 32.290              | 0.176             | 1:10 <sup>6</sup> |
| RPLP0 | 1                   | 32.16                  |                      |                     |                   |                   |
| RPLP0 | 1                   | 32.22                  |                      |                     |                   |                   |
| RPLP0 | NTC                 | 39.62                  |                      |                     |                   |                   |

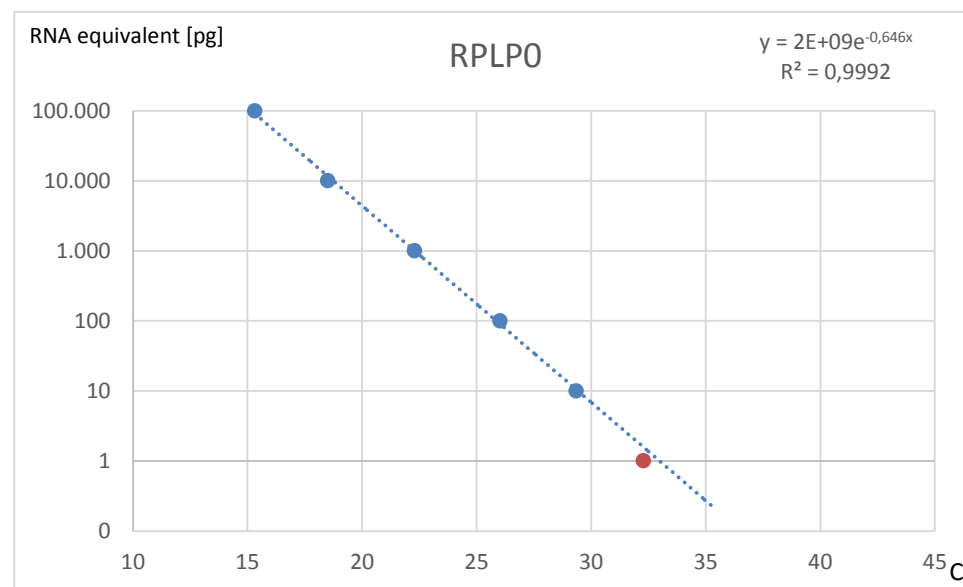

| Slope           | % Efficiency | LDR                      | LOD                |
|-----------------|--------------|--------------------------|--------------------|
| [95% CI]        | [95% CI]     | (dilution range)         | (dilution)         |
| -3.509          | 92.7         | 1:10 – 1:10 <sup>5</sup> | ≤1:10 <sup>6</sup> |
| [-3.980/-3.038] | [78.3/113.4] |                          |                    |

SD = standard deviation; NTC = no-template control; LDR = linear dynamic range; LOD = limit of detection; R<sup>2</sup> = coefficient of determination; CI = confidence interval

RNA18S5 (factor-specific primer efficiency)

| Gene   | RNA equivalent [pg] | C <sub>q</sub> Triplet | C <sub>q</sub> 95%CI | C <sub>q</sub> Mean | C <sub>q</sub> SD | cDNA dilution     |
|--------|---------------------|------------------------|----------------------|---------------------|-------------------|-------------------|
| RNA18S | 100000              | 4.65                   | 4.57 /4.71           | 4.640               | 0.026             | 1:10              |
| RNA18S | 100000              | 4.66                   |                      |                     |                   |                   |
| RNA18S | 100000              | 4.61                   |                      |                     |                   |                   |
| RNA18S | 10000               | 7.06                   | 7.00 /7.13           | 7.063               | 0.025             | 1:10 <sup>2</sup> |
| RNA18S | 10000               | 7.09                   |                      |                     |                   |                   |
| RNA18S | 10000               | 7.04                   |                      |                     |                   |                   |
| RNA18S | 1000                | 10.68                  | 10.54 /10.95         | 10.747              | 0.083             | 1:10 <sup>3</sup> |
| RNA18S | 1000                | 10.84                  |                      |                     |                   |                   |
| RNA18S | 1000                | 10.72                  |                      |                     |                   |                   |
| RNA18S | 100                 | 14.23                  | 13.98 /14.88         | 14.433              | 0.182             | 1:10 <sup>4</sup> |
| RNA18S | 100                 | 14.49                  |                      |                     |                   |                   |
| RNA18S | 100                 | 14.58                  |                      |                     |                   |                   |
| RNA18S | 10                  | 17.66                  | 17.50 /18.05         | 17.777              | 0.111             | 1:10 <sup>5</sup> |
| RNA18S | 10                  | 17.88                  |                      |                     |                   |                   |
| RNA18S | 10                  | 17.79                  |                      |                     |                   |                   |
| RNA18S | 1                   | 21.00                  | 20.73 /21.74         | 21.233              | 0.202             | 1:10 <sup>6</sup> |
| RNA18S | 1                   | 21.35                  |                      |                     |                   |                   |
| RNA18S | 1                   | 21.35                  |                      |                     |                   |                   |
| RNA18S | NTC                 | 35.26                  |                      |                     |                   |                   |

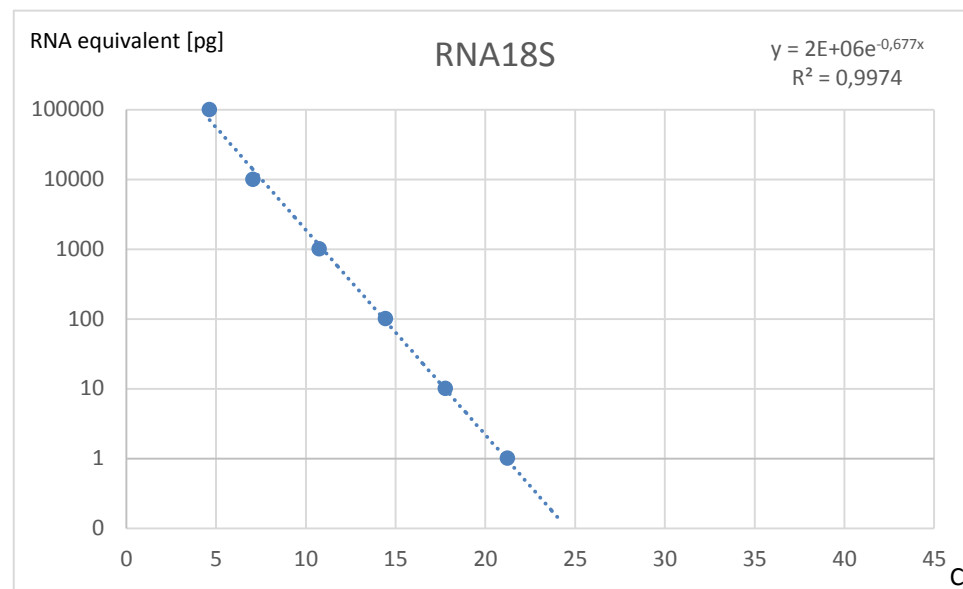

| Slope           | % Efficiency | LDR                      | LOD                |
|-----------------|--------------|--------------------------|--------------------|
| [95% CI]        | [95% CI]     | (dilution range)         | (dilution)         |
| -3.319          | 100.1        | 1:10 – 1:10 <sup>6</sup> | ≤1:10 <sup>6</sup> |
| [-3.967/-2.670] | [78.7/136.9] |                          |                    |

SD = standard deviation; NTC = no-template control; LDR = linear dynamic range; LOD = limit of detection; R<sup>2</sup> = coefficient of determination; CI = confidence interval

**Supplementary Data 5.** Evaluation of a commercially available primer pair for TUBB (Qiagen, PPH17836A). Primer specificity was evaluated and confirmed by melting curve analysis (**a,b**) and agarose gel electrophoresis (**c**). **d** To calculate primer efficiency  $E_P$ , which was within the pre-specified acceptable range, a serial  $\log_{10}$  dilution of cDNA stock solution (1,000,000 pg RNA equivalent) was performed in triplets. From the resulting  $C_q$  values a standard curve was created by linear regression. The 1:10 dilution used for qPCR for all genes/primers, however, was beyond the linear dynamic range LDR. **e** Amplification efficiency  $E_A$  was calculated with LinRegPCR and within the pre-specified acceptable range. **f** Raw qPCR  $C_q$  values for TUBB (triplet means). **g** Reference gene stability rankings including TUBB as 10<sup>th</sup> candidate reference gene indicate low intergroup expression stability in hPDL experiments on orthodontic tooth movement and periodontitis.

(a) Melting curve analysis and Amplification plot (main qPCR)

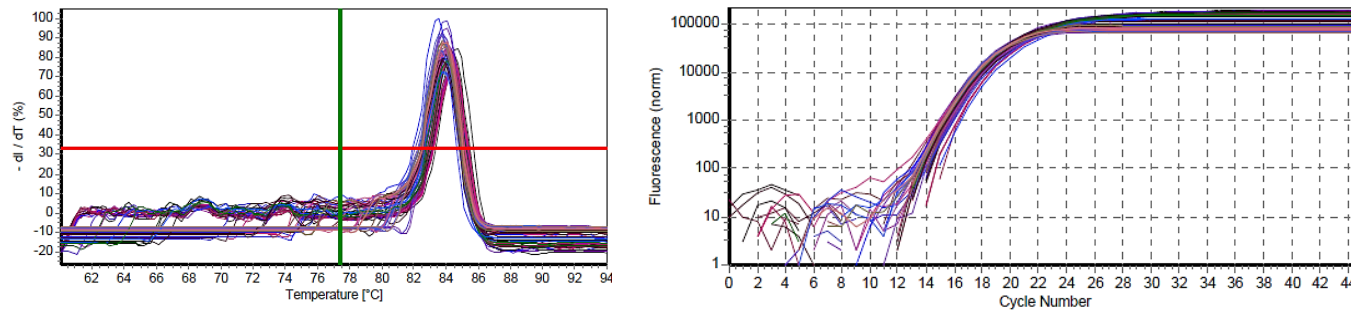

(c) Agarose gel electrophoresis (main qPCR)

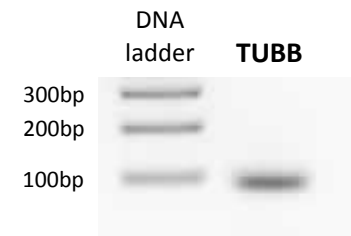

(b) Melting curve analysis and Amplification plot (efficiency qPCR – standard curve)

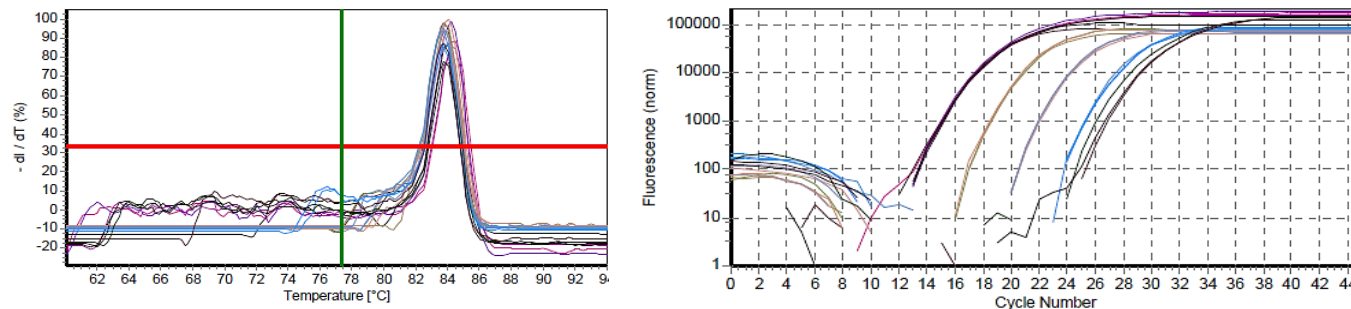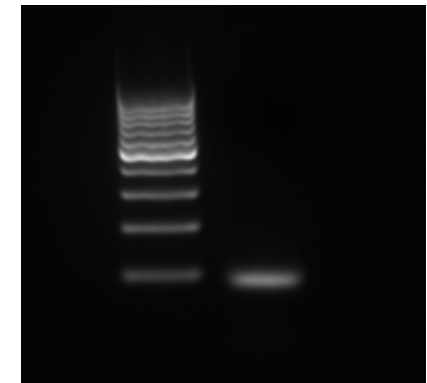

(d) TUBB Primer efficiency (factor-specific)

| Gene | RNA equivalent [pg] | C <sub>q</sub> Triplet | C <sub>q</sub> 95%CI | C <sub>q</sub> Mean | C <sub>q</sub> SD | cDNA dilution     |
|------|---------------------|------------------------|----------------------|---------------------|-------------------|-------------------|
| TUBB | 100000              | 19.65                  | 19.38 /19.79         | 19.583              | 0.083             | 1:10              |
| TUBB | 10000               | 19.45                  | 17.21 /20.34         | 18.777              | 0.631             | 1:10 <sup>2</sup> |
| TUBB | 1000                | 21.67                  | 21.07 /21.93         | 21.500              | 0.175             | 1:10 <sup>3</sup> |
| TUBB | 100                 | 24.87                  | 24.81 /25.03         | 24.920              | 0.046             | 1:10 <sup>4</sup> |
| TUBB | 10                  | 28.16                  | 27.80 /29.14         | 28.467              | 0.270             | 1:10 <sup>5</sup> |
| TUBB | 1                   | 30.40                  | 29.87 /31.75         | 30.807              | 0.379             | 1:10 <sup>6</sup> |
| TUBB | NTC                 | 42.23                  |                      |                     |                   |                   |
| TUBB | -RT                 | 32.31                  |                      |                     |                   |                   |

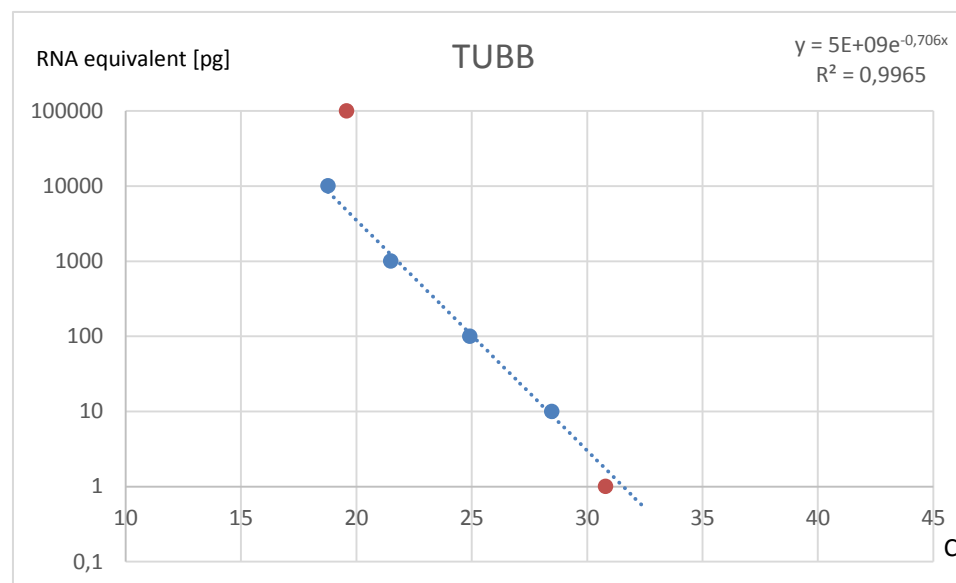

| Slope         | % Efficiency | LDR                                   | LOD                |
|---------------|--------------|---------------------------------------|--------------------|
| [95% CI]      | [95% CI]     | (dilution range)                      | (dilution)         |
| -3.230        | 104.0        | 1:10 <sup>2</sup> – 1:10 <sup>5</sup> | ≤1:10 <sup>6</sup> |
| [-4.33/-2.13] | [52.2/165.0] |                                       |                    |

SD = standard deviation; NTC = no-template control; -RT = control without reverse transcriptase; LDR = linear dynamic range; LOD = limit of detection; R<sup>2</sup> = coefficient of determination; CI = confidence interval

(e) Primer efficiency (factor-specific) and coefficients of determination derived from a standard curve for TUBB (6x log<sub>10</sub> dilution of cDNA stock solution, random untreated sample) as well as technical repeatability (intraassay reliability, n = 18) and amplification efficiency (sample-specific), calculated using LinRegPCR software (<http://LinRegPCR.HFRC.nl>; n = 18 in triplets).

| Gene symbol | Slope  | Primer efficiency<br>$E_P$ [%]<br>( $2^{E_P/100\%}$ ) | Coefficient of determination<br>$R^2$ | Intraassay reliability<br>SD of mean of $C_q$ *<br>(mean, min./max.) | Amplification Efficiency $E_A$<br>[%] ( $2^{E_A/100\%}$ ) |
|-------------|--------|-------------------------------------------------------|---------------------------------------|----------------------------------------------------------------------|-----------------------------------------------------------|
| <b>TUBB</b> | -3.230 | 104.0<br>(2.056)                                      | 0.9965                                | 0.26<br>0.05 / 0.63                                                  | 91.3<br>(1.883)                                           |

\* of three technical replicates (triplet) among all biological replicates (n = 18). CI = confidence interval

$C_q$  = quantification cycle; SD = standard deviation of group mean.  
Agac = Aggregatibacter actinomycetemcomitans (periodontitis)

(f) Raw  $C_q$  values (triplet means) of TUBB RT-qPCR for the three experimental groups.

| RAW $C_q$ values                       | Group | Gene<br>TUBB |
|----------------------------------------|-------|--------------|
| Control K7                             | 1     | 20.10        |
| Control K8                             | 1     | 20.71        |
| Control K9                             | 1     | 19.58        |
| Control K10                            | 1     | 19.53        |
| Control K11                            | 1     | 19.54        |
| Control K12                            | 1     | 19.30        |
| Compression D7                         | 2     | 18.84        |
| Compression D8                         | 2     | 19.06        |
| Compression D9                         | 2     | 19.88        |
| Compression D10                        | 2     | 19.10        |
| Compression D11                        | 2     | 18.55        |
| Compression D12                        | 2     | 19.50        |
| Agac7                                  | 3     | 19.30        |
| Agac8                                  | 3     | 18.49        |
| Agac9                                  | 3     | 18.29        |
| Agac10                                 | 3     | 18.53        |
| Agac11                                 | 3     | 19.19        |
| Agac12                                 | 3     | 18.38        |
| <b><math>C_q</math> SD Control</b>     | 1     | 0.52         |
| <b><math>C_q</math> SD Compression</b> | 2     | 0.47         |
| <b><math>C_q</math> SD Agac</b>        | 3     | 0.43         |

(g) Reference gene stability ranking including TUBB for hPDL experiments on orthodontic tooth movement (compressive orthodontic force vs. untreated control), experiments on periodontitis (Agac, toxins/bacterial lysate vs. untreated control) and pooled/overall experimental conditions as calculated by the algorithms geNorm, NormFinder, comparative  $\Delta C_q$  and BestKeeper. A higher rank denotes lower expression stability.

| Rank                                                                                                      | Total<br>(of 4 methods) |             | geNorm           |                           | NormFinder       |                                                |                   | comparative $\Delta C_q$ |                                                       | BestKeeper       |                           |                    |                  |
|-----------------------------------------------------------------------------------------------------------|-------------------------|-------------|------------------|---------------------------|------------------|------------------------------------------------|-------------------|--------------------------|-------------------------------------------------------|------------------|---------------------------|--------------------|------------------|
|                                                                                                           | Ranking<br>order        | Rank<br>sum | Ranking<br>order | Stability<br>value<br>(M) | Ranking<br>order | Stability<br>value<br>( $\rho_{ij}/\sigma_i$ ) | Standard<br>error | Ranking<br>order         | Stability value<br>(mean SD of<br>mean $\Delta C_q$ ) | Ranking<br>order | Stability<br>value<br>(r) | SD<br>(+/- $C_q$ ) | CV<br>(% $C_q$ ) |
| <b>hPDL untreated + compressive orthodontic force</b> (experiments on orthodontic tooth movement, n = 12) |                         |             |                  |                           |                  |                                                |                   |                          |                                                       |                  |                           |                    |                  |
| 1.)                                                                                                       | <b>RPL22</b>            | <b>6</b>    | <b>RPL22</b>     | <b>0.263</b>              | <b>RPL22</b>     | <b>0.043</b>                                   | <b>0.033</b>      | <b>RPL22</b>             | <b>0.271</b>                                          | <b>RNA18S5</b>   | <b>0.910</b>              | <b>0.259</b>       | <b>3.110</b>     |
| 2.)                                                                                                       | <b>PPIB</b>             | <b>13</b>   | <b>PPIB</b>      | <b>0.286</b>              | <b>EEF1A1</b>    | <b>0.092</b>                                   | <b>0.031</b>      | <b>PPIB</b>              | <b>0.296</b>                                          | <b>YWHAZ</b>     | <b>0.905</b>              | <b>0.373</b>       | <b>1.728</b>     |
| 3.)                                                                                                       | <b>RPLP0</b>            | <b>17</b>   | <b>RPLP0</b>     | <b>0.296</b>              | <b>RPLP0</b>     | <b>0.097</b>                                   | <b>0.031</b>      | <b>RPLP0</b>             | <b>0.307</b>                                          | <b>RPL22</b>     | <b>0.856</b>              | <b>0.121</b>       | <b>0.665</b>     |
| 4.)                                                                                                       | TBP                     | 18          | TBP              | 0.299                     | PPIB             | 0.099                                          | 0.031             | EEF1A1                   | 0.311                                                 | <b>TBP</b>       | <b>0.657</b>              | <b>0.202</b>       | <b>0.860</b>     |
| 5.)                                                                                                       | EEF1A1                  | 18          | EEF1A1           | 0.302                     | TBP              | 0.121                                          | 0.034             | TBP                      | 0.314                                                 | <b>PPIB</b>      | <b>0.627</b>              | <b>0.187</b>       | <b>1.128</b>     |
| 6.)                                                                                                       | RNA18S5                 | 19          | RNA18S5          | 0.347                     | RNA18S5          | 0.152                                          | 0.039             | RNA18S5                  | 0.350                                                 | POLR2A           | 0.533                     | 0.357              | 1.681            |
| 7.)                                                                                                       | YWHAZ                   | 29          | GAPDH            | 0.350                     | GAPDH            | 0.166                                          | 0.041             | GAPDH                    | 0.365                                                 | EEF1A1           | 0.505                     | 0.114              | 0.814            |
| 8.)                                                                                                       | POLR2A                  | 30          | POLR2A           | 0.399                     | POLR2A           | 0.230                                          | 0.053             | POLR2A                   | 0.423                                                 | RPLP0            | 0.364                     | 0.098              | 0.601            |
| 9.)                                                                                                       | GAPDH                   | 31          | YWHAZ            | 0.424                     | YWHAZ            | 0.234                                          | 0.054             | YWHAZ                    | 0.449                                                 | <b>TUBB</b>      | <b>0.187</b>              | <b>0.420</b>       | <b>2.157</b>     |
| 10.)                                                                                                      | <b>TUBB</b>             | <b>39</b>   | <b>TUBB</b>      | <b>0.678</b>              | <b>TUBB</b>      | <b>0.449</b>                                   | <b>0.097</b>      | <b>TUBB</b>              | <b>0.664</b>                                          | GAPDH            | -0.154                    | 0.117              | 0.776            |
| <b>hPDL untreated + Agac toxins/bacterial lysate</b> (experiments on periodontitis, n = 12)               |                         |             |                  |                           |                  |                                                |                   |                          |                                                       |                  |                           |                    |                  |
| 1.)                                                                                                       | <b>PPIB</b>             | <b>8</b>    | <b>PPIB</b>      | <b>0.250</b>              | <b>PPIB</b>      | <b>0.066</b>                                   | <b>0.031</b>      | <b>PPIB</b>              | <b>0.255</b>                                          | <b>RNA18S5</b>   | <b>0.815</b>              | <b>0.269</b>       | <b>3.261</b>     |
| 2.)                                                                                                       | <b>TBP</b>              | <b>10</b>   | <b>TBP</b>       | <b>0.259</b>              | <b>TBP</b>       | <b>0.077</b>                                   | <b>0.031</b>      | <b>TBP</b>               | <b>0.265</b>                                          | <b>POLR2A</b>    | <b>0.599</b>              | <b>0.176</b>       | <b>0.836</b>     |
| 3.)                                                                                                       | POLR2A                  | 18          | EEF1A1           | 0.269                     | GAPDH            | 0.116                                          | 0.034             | EEF1A1                   | 0.270                                                 | YWHAZ            | 0.567                     | 0.318              | 1.488            |
| 4.)                                                                                                       | <b>RPL22</b>            | <b>20</b>   | <b>RPL22</b>     | <b>0.284</b>              | POLR2A           | 0.121                                          | 0.035             | <b>RPL22</b>             | <b>0.290</b>                                          | TBP              | 0.514                     | 0.121              | 0.518            |
| 5.)                                                                                                       | EEF1A1                  | 21          | POLR2A           | 0.286                     | <b>RPL22</b>     | <b>0.122</b>                                   | <b>0.035</b>      | GAPDH                    | 0.295                                                 | PPIB             | 0.449                     | 0.099              | 0.602            |
| 6.)                                                                                                       | GAPDH                   | 21          | RPLP0            | 0.286                     | EEF1A1           | 0.128                                          | 0.036             | RPLP0                    | 0.296                                                 | GAPDH            | 0.420                     | 0.159              | 1.044            |
| 7.)                                                                                                       | RNA18S5                 | 25          | GAPDH            | 0.287                     | RPLP0            | 0.140                                          | 0.038             | POLR2A                   | 0.297                                                 | <b>RPL22</b>     | <b>0.343</b>              | <b>0.164</b>       | <b>0.902</b>     |
| 8.)                                                                                                       | RPLP0                   | 29          | RNA18S5          | 0.380                     | RNA18S5          | 0.166                                          | 0.042             | RNA18S5                  | 0.381                                                 | <b>TUBB</b>      | <b>0.324</b>              | <b>0.558</b>       | <b>2.897</b>     |
| 9.)                                                                                                       | YWHAZ                   | 30          | YWHAZ            | 0.420                     | YWHAZ            | 0.203                                          | 0.049             | YWHAZ                    | 0.439                                                 | EEF1A1           | 0.313                     | 0.167              | 1.170            |
| 10.)                                                                                                      | <b>TUBB</b>             | <b>38</b>   | <b>TUBB</b>      | <b>0.815</b>              | <b>TUBB</b>      | <b>0.554</b>                                   | <b>0.119</b>      | <b>TUBB</b>              | <b>0.792</b>                                          | RPLP0            | 0.291                     | 0.172              | 1.049            |
| <b>hPDL pooled/overall</b> (experiments on orthodontic tooth movement and periodontitis n = 18)           |                         |             |                  |                           |                  |                                                |                   |                          |                                                       |                  |                           |                    |                  |
| 1.)                                                                                                       | <b>PPIB</b>             | <b>7</b>    | <b>PPIB</b>      | <b>0.296</b>              | <b>PPIB</b>      | <b>0.076</b>                                   | <b>0.026</b>      | <b>PPIB</b>              | <b>0.306</b>                                          | <b>RNA18S5</b>   | <b>0.859</b>              | <b>0.266</b>       | <b>3.199</b>     |
| 2.)                                                                                                       | <b>TBP</b>              | <b>12</b>   | <b>TBP</b>       | <b>0.304</b>              | <b>RPL22</b>     | <b>0.093</b>                                   | <b>0.026</b>      | <b>RPL22</b>             | <b>0.313</b>                                          | <b>YWHAZ</b>     | <b>0.759</b>              | <b>0.381</b>       | <b>1.777</b>     |
| 3.)                                                                                                       | <b>RPL22</b>            | <b>12</b>   | <b>RPL22</b>     | <b>0.304</b>              | <b>TBP</b>       | <b>0.096</b>                                   | <b>0.026</b>      | <b>RPL22</b>             | <b>0.316</b>                                          | <b>TBP</b>       | <b>0.625</b>              | <b>0.173</b>       | <b>0.735</b>     |
| 4.)                                                                                                       | RPLP0                   | 19          | RPLP0            | 0.326                     | RPLP0            | 0.135                                          | 0.030             | RPLP0                    | 0.338                                                 | PPIB             | 0.587                     | 0.158              | 0.955            |
| 5.)                                                                                                       | RNA18S5                 | 19          | EEF1A1           | 0.357                     | RNA18S5          | 0.159                                          | 0.033             | EEF1A1                   | 0.362                                                 | POLR2A           | 0.525                     | 0.280              | 1.320            |
| 6.)                                                                                                       | EEF1A1                  | 24          | POLR2A           | 0.373                     | EEF1A1           | 0.171                                          | 0.035             | RNA18S5                  | 0.383                                                 | RPL22            | 0.485                     | 0.141              | 0.776            |
| 7.)                                                                                                       | POLR2A                  | 25          | RNA18S5          | 0.379                     | POLR2A           | 0.184                                          | 0.037             | POLR2A                   | 0.391                                                 | RPLP0            | 0.262                     | 0.149              | 0.913            |
| 8.)                                                                                                       | YWHAZ                   | 29          | GAPDH            | 0.384                     | GAPDH            | 0.195                                          | 0.038             | GAPDH                    | 0.400                                                 | EEF1A1           | 0.261                     | 0.181              | 1.277            |
| 9.)                                                                                                       | GAPDH                   | 34          | YWHAZ            | 0.465                     | YWHAZ            | 0.253                                          | 0.047             | YWHAZ                    | 0.491                                                 | <b>TUBB</b>      | <b>0.236</b>              | <b>0.501</b>       | <b>2.605</b>     |
| 10.)                                                                                                      | <b>TUBB</b>             | <b>39</b>   | <b>TUBB</b>      | <b>0.744</b>              | <b>TUBB</b>      | <b>0.491</b>                                   | <b>0.085</b>      | <b>TUBB</b>              | <b>0.726</b>                                          | GAPDH            | 0.057                     | 0.189              | 1.245            |

$C_q$  = quantification cycle; SD = standard deviation; CV = coefficient of variation; r = Pearson's correlation coefficient
